# Supplementary material for: Highly Diverse Aquatic Microbial Communities Separated by Permafrost in Greenland Show Distinct Features According to Environmental Niches
Source: Front Microbiol. 2019 Jul 11;10:1583. doi: 10.3389/fmicb.2019.01583 (PMC6637822; doi:10.3389/fmicb.2019.01583)
Supplement: Supplementary file 4 [file Table_3.xlsx]

## Sheet: TableS3
Supplementary Table S3. Metabolic assignments of the archaeal taxa predicted with FAPROTAX.
# acetoclastic_methanogenesis (48 records):
Archaea; Euryarchaeota; Methanomicrobia; Methanosarcinales; Methanosaetaceae; Methanosaeta
Archaea; Euryarchaeota; Methanomicrobia; Methanosarcinales; Methanosaetaceae; Methanosaeta
Archaea; Euryarchaeota; Methanomicrobia; Methanosarcinales; Methanosaetaceae; Methanosaeta
Archaea; Euryarchaeota; Methanomicrobia; Methanosarcinales; Methanosaetaceae; Methanosaeta
Archaea; Euryarchaeota; Methanomicrobia; Methanosarcinales; Methanosaetaceae; Methanosaeta
Archaea; Euryarchaeota; Methanomicrobia; Methanosarcinales; Methanosaetaceae; Methanosaeta
Archaea; Euryarchaeota; Methanomicrobia; Methanosarcinales; Methanosaetaceae; Methanosaeta
Archaea; Euryarchaeota; Methanomicrobia; Methanosarcinales; Methanosaetaceae; Methanosaeta
Archaea; Euryarchaeota; Methanomicrobia; Methanosarcinales; Methanosaetaceae; Methanosaeta
Archaea; Euryarchaeota; Methanomicrobia; Methanosarcinales; Methanosaetaceae; Methanosaeta
Archaea; Euryarchaeota; Methanomicrobia; Methanosarcinales; Methanosaetaceae; Methanosaeta
Archaea; Euryarchaeota; Methanomicrobia; Methanosarcinales; Methanosaetaceae; Methanosaeta
Archaea; Euryarchaeota; Methanomicrobia; Methanosarcinales; Methanosaetaceae; Methanosaeta
Archaea; Euryarchaeota; Methanomicrobia; Methanosarcinales; Methanosaetaceae; Methanosaeta
Archaea; Euryarchaeota; Methanomicrobia; Methanosarcinales; Methanosaetaceae; Methanosaeta
Archaea; Euryarchaeota; Methanomicrobia; Methanosarcinales; Methanosaetaceae; Methanosaeta
Archaea; Euryarchaeota; Methanomicrobia; Methanosarcinales; Methanosaetaceae; Methanosaeta
Archaea; Euryarchaeota; Methanomicrobia; Methanosarcinales; Methanosaetaceae; Methanosaeta
Archaea; Euryarchaeota; Methanomicrobia; Methanosarcinales; Methanosaetaceae; Methanosaeta
Archaea; Euryarchaeota; Methanomicrobia; Methanosarcinales; Methanosaetaceae; Methanosaeta
Archaea; Euryarchaeota; Methanomicrobia; Methanosarcinales; Methanosaetaceae; Methanosaeta
Archaea; Euryarchaeota; Methanomicrobia; Methanosarcinales; Methanosaetaceae; Methanosaeta
Archaea; Euryarchaeota; Methanomicrobia; Methanosarcinales; Methanosaetaceae; Methanosaeta
Archaea; Euryarchaeota; Methanomicrobia; Methanosarcinales; Methanosaetaceae; Methanosaeta
Archaea; Euryarchaeota; Methanomicrobia; Methanosarcinales; Methanosaetaceae; Methanosaeta
Archaea; Euryarchaeota; Methanomicrobia; Methanosarcinales; Methanosaetaceae; Methanosaeta
Archaea; Euryarchaeota; Methanomicrobia; Methanosarcinales; Methanosaetaceae; Methanosaeta
Archaea; Euryarchaeota; Methanomicrobia; Methanosarcinales; Methanosaetaceae; Methanosaeta
Archaea; Euryarchaeota; Methanomicrobia; Methanosarcinales; Methanosaetaceae; Methanosaeta
Archaea; Euryarchaeota; Methanomicrobia; Methanosarcinales; Methanosaetaceae; Methanosaeta
Archaea; Euryarchaeota; Methanomicrobia; Methanosarcinales; Methanosaetaceae; Methanosaeta
Archaea; Euryarchaeota; Methanomicrobia; Methanosarcinales; Methanosaetaceae; Methanosaeta
Archaea; Euryarchaeota; Methanomicrobia; Methanosarcinales; Methanosaetaceae; Methanosaeta
Archaea; Euryarchaeota; Methanomicrobia; Methanosarcinales; Methanosaetaceae; Methanosaeta
Archaea; Euryarchaeota; Methanomicrobia; Methanosarcinales; Methanosaetaceae; Methanosaeta
Archaea; Euryarchaeota; Methanomicrobia; Methanosarcinales; Methanosaetaceae; Methanosaeta
Archaea; Euryarchaeota; Methanomicrobia; Methanosarcinales; Methanosaetaceae; Methanosaeta
Archaea; Euryarchaeota; Methanomicrobia; Methanosarcinales; Methanosaetaceae; Methanosaeta
Archaea; Euryarchaeota; Methanomicrobia; Methanosarcinales; Methanosaetaceae; Methanosaeta
Archaea; Euryarchaeota; Methanomicrobia; Methanosarcinales; Methanosaetaceae; Methanosaeta
Archaea; Euryarchaeota; Methanomicrobia; Methanosarcinales; Methanosaetaceae; Methanosaeta
Archaea; Euryarchaeota; Methanomicrobia; Methanosarcinales; Methanosaetaceae; Methanosaeta
Archaea; Euryarchaeota; Methanomicrobia; Methanosarcinales; Methanosaetaceae; Methanosaeta
Archaea; Euryarchaeota; Methanomicrobia; Methanosarcinales; Methanosaetaceae; Methanosaeta
Archaea; Euryarchaeota; Methanomicrobia; Methanosarcinales; Methanosaetaceae; Methanosaeta
Archaea; Euryarchaeota; Methanomicrobia; Methanosarcinales; Methanosaetaceae; Methanosaeta
Archaea; Euryarchaeota; Methanomicrobia; Methanosarcinales; Methanosaetaceae; Methanosaeta
Archaea; Euryarchaeota; Methanomicrobia; Methanosarcinales; Methanosaetaceae; Methanosaeta
# methanogenesis_by_disproportionation_of_methyl_groups (5 records):
Archaea; Euryarchaeota; Methanomicrobia; Methanosarcinales; Methanosarcinaceae; Methanosarcina
Archaea; Euryarchaeota; Methanomicrobia; Methanosarcinales; Methanosarcinaceae; Methanosarcina
Archaea; Euryarchaeota; Methanomicrobia; Methanosarcinales; Methanosarcinaceae; Methanosarcina
Archaea; Euryarchaeota; Methanomicrobia; Methanosarcinales; Methanosarcinaceae; Methanosarcina
Archaea; Euryarchaeota; Methanomicrobia; Methanosarcinales; Methanosarcinaceae; Methanosarcina
# methanogenesis_using_formate (3 records):
Archaea; Euryarchaeota; Methanomicrobia; Methanomicrobiales; Methanospirillaceae; Methanospirillum
Archaea; Euryarchaeota; Methanomicrobia; Methanomicrobiales; Methanospirillaceae; Methanospirillum
Archaea; Euryarchaeota; Methanomicrobia; Methanomicrobiales; Methanospirillaceae; Methanospirillum
# methanogenesis_by_CO2_reduction_with_H2 (291 records):
Archaea; Euryarchaeota; Methanobacteria; Methanobacteriales; Methanobacteriaceae; Methanobacterium
Archaea; Euryarchaeota; Methanobacteria; Methanobacteriales; Methanobacteriaceae; Methanobacterium
Archaea; Euryarchaeota; Methanobacteria; Methanobacteriales; Methanobacteriaceae; Methanobacterium
Archaea; Euryarchaeota; Methanobacteria; Methanobacteriales; Methanobacteriaceae; Methanobacterium
Archaea; Euryarchaeota; Methanobacteria; Methanobacteriales; Methanobacteriaceae; Methanobacterium
Archaea; Euryarchaeota; Methanobacteria; Methanobacteriales; Methanobacteriaceae; Methanobacterium
Archaea; Euryarchaeota; Methanobacteria; Methanobacteriales; Methanobacteriaceae; Methanobacterium
Archaea; Euryarchaeota; Methanobacteria; Methanobacteriales; Methanobacteriaceae; Methanobacterium
Archaea; Euryarchaeota; Methanobacteria; Methanobacteriales; Methanobacteriaceae; Methanobacterium
Archaea; Euryarchaeota; Methanobacteria; Methanobacteriales; Methanobacteriaceae; Methanobacterium
Archaea; Euryarchaeota; Methanomicrobia; Methanomicrobiales; Methanomicrobiales_unclassified; Methanomicrobiales_unclassified
Archaea; Euryarchaeota; Methanomicrobia; Methanomicrobiales; Methanomicrobiales_unclassified; Methanomicrobiales_unclassified
Archaea; Euryarchaeota; Methanomicrobia; Methanomicrobiales; Methanomicrobiales_unclassified; Methanomicrobiales_unclassified
Archaea; Euryarchaeota; Methanomicrobia; Methanomicrobiales; Methanomicrobiales_unclassified; Methanomicrobiales_unclassified
Archaea; Euryarchaeota; Methanomicrobia; Methanomicrobiales; Methanomicrobiales_unclassified; Methanomicrobiales_unclassified
Archaea; Euryarchaeota; Methanomicrobia; Methanomicrobiales; Methanomicrobiales_unclassified; Methanomicrobiales_unclassified
Archaea; Euryarchaeota; Methanomicrobia; Methanomicrobiales; Methanoregulaceae; Methanolinea
Archaea; Euryarchaeota; Methanomicrobia; Methanomicrobiales; Methanoregulaceae; Methanolinea
Archaea; Euryarchaeota; Methanomicrobia; Methanomicrobiales; Methanoregulaceae; Methanoregula
Archaea; Euryarchaeota; Methanomicrobia; Methanomicrobiales; Methanoregulaceae; Methanoregula
Archaea; Euryarchaeota; Methanomicrobia; Methanomicrobiales; Methanoregulaceae; Methanoregula
Archaea; Euryarchaeota; Methanomicrobia; Methanomicrobiales; Methanoregulaceae; Methanoregula
Archaea; Euryarchaeota; Methanomicrobia; Methanomicrobiales; Methanoregulaceae; Methanoregula
Archaea; Euryarchaeota; Methanomicrobia; Methanomicrobiales; Methanoregulaceae; Methanoregula
Archaea; Euryarchaeota; Methanomicrobia; Methanomicrobiales; Methanoregulaceae; Methanoregula
Archaea; Euryarchaeota; Methanomicrobia; Methanomicrobiales; Methanoregulaceae; Methanoregula
Archaea; Euryarchaeota; Methanomicrobia; Methanomicrobiales; Methanoregulaceae; Methanoregula
Archaea; Euryarchaeota; Methanomicrobia; Methanomicrobiales; Methanoregulaceae; Methanoregula
Archaea; Euryarchaeota; Methanomicrobia; Methanomicrobiales; Methanoregulaceae; Methanoregula
Archaea; Euryarchaeota; Methanomicrobia; Methanomicrobiales; Methanoregulaceae; Methanoregula
Archaea; Euryarchaeota; Methanomicrobia; Methanomicrobiales; Methanoregulaceae; Methanoregula
Archaea; Euryarchaeota; Methanomicrobia; Methanomicrobiales; Methanoregulaceae; Methanoregula
Archaea; Euryarchaeota; Methanomicrobia; Methanomicrobiales; Methanoregulaceae; Methanoregula
Archaea; Euryarchaeota; Methanomicrobia; Methanomicrobiales; Methanoregulaceae; Methanoregula
Archaea; Euryarchaeota; Methanomicrobia; Methanomicrobiales; Methanoregulaceae; Methanoregula
Archaea; Euryarchaeota; Methanomicrobia; Methanomicrobiales; Methanoregulaceae; Methanoregula
Archaea; Euryarchaeota; Methanomicrobia; Methanomicrobiales; Methanoregulaceae; Methanoregula
Archaea; Euryarchaeota; Methanomicrobia; Methanomicrobiales; Methanoregulaceae; Methanoregula
Archaea; Euryarchaeota; Methanomicrobia; Methanomicrobiales; Methanoregulaceae; Methanoregula
Archaea; Euryarchaeota; Methanomicrobia; Methanomicrobiales; Methanoregulaceae; Methanoregula
Archaea; Euryarchaeota; Methanomicrobia; Methanomicrobiales; Methanoregulaceae; Methanoregula
Archaea; Euryarchaeota; Methanomicrobia; Methanomicrobiales; Methanoregulaceae; Methanoregula
Archaea; Euryarchaeota; Methanomicrobia; Methanomicrobiales; Methanoregulaceae; Methanoregula
Archaea; Euryarchaeota; Methanomicrobia; Methanomicrobiales; Methanoregulaceae; Methanoregula
Archaea; Euryarchaeota; Methanomicrobia; Methanomicrobiales; Methanoregulaceae; Methanoregula
Archaea; Euryarchaeota; Methanomicrobia; Methanomicrobiales; Methanoregulaceae; Methanoregula
Archaea; Euryarchaeota; Methanomicrobia; Methanomicrobiales; Methanoregulaceae; Methanoregula
Archaea; Euryarchaeota; Methanomicrobia; Methanomicrobiales; Methanoregulaceae; Methanoregula
Archaea; Euryarchaeota; Methanomicrobia; Methanomicrobiales; Methanoregulaceae; Methanoregula
Archaea; Euryarchaeota; Methanomicrobia; Methanomicrobiales; Methanoregulaceae; Methanoregula
Archaea; Euryarchaeota; Methanomicrobia; Methanomicrobiales; Methanoregulaceae; Methanoregula
Archaea; Euryarchaeota; Methanomicrobia; Methanomicrobiales; Methanoregulaceae; Methanoregula
Archaea; Euryarchaeota; Methanomicrobia; Methanomicrobiales; Methanoregulaceae; Methanoregula
Archaea; Euryarchaeota; Methanomicrobia; Methanomicrobiales; Methanoregulaceae; Methanoregula
Archaea; Euryarchaeota; Methanomicrobia; Methanomicrobiales; Methanoregulaceae; Methanoregula
Archaea; Euryarchaeota; Methanomicrobia; Methanomicrobiales; Methanoregulaceae; Methanoregula
Archaea; Euryarchaeota; Methanomicrobia; Methanomicrobiales; Methanoregulaceae; Methanoregula
Archaea; Euryarchaeota; Methanomicrobia; Methanomicrobiales; Methanoregulaceae; Methanoregula
Archaea; Euryarchaeota; Methanomicrobia; Methanomicrobiales; Methanoregulaceae; Methanoregula
Archaea; Euryarchaeota; Methanomicrobia; Methanomicrobiales; Methanoregulaceae; Methanoregula
Archaea; Euryarchaeota; Methanomicrobia; Methanomicrobiales; Methanoregulaceae; Methanoregula
Archaea; Euryarchaeota; Methanomicrobia; Methanomicrobiales; Methanoregulaceae; Methanoregula
Archaea; Euryarchaeota; Methanomicrobia; Methanomicrobiales; Methanoregulaceae; Methanoregula
Archaea; Euryarchaeota; Methanomicrobia; Methanomicrobiales; Methanoregulaceae; Methanoregula
Archaea; Euryarchaeota; Methanomicrobia; Methanomicrobiales; Methanoregulaceae; Methanoregula
Archaea; Euryarchaeota; Methanomicrobia; Methanomicrobiales; Methanoregulaceae; Methanoregula
Archaea; Euryarchaeota; Methanomicrobia; Methanomicrobiales; Methanoregulaceae; Methanoregula
Archaea; Euryarchaeota; Methanomicrobia; Methanomicrobiales; Methanoregulaceae; Methanoregula
Archaea; Euryarchaeota; Methanomicrobia; Methanomicrobiales; Methanoregulaceae; Methanoregula
Archaea; Euryarchaeota; Methanomicrobia; Methanomicrobiales; Methanoregulaceae; Methanoregula
Archaea; Euryarchaeota; Methanomicrobia; Methanomicrobiales; Methanoregulaceae; Methanoregula
Archaea; Euryarchaeota; Methanomicrobia; Methanomicrobiales; Methanoregulaceae; Methanoregula
Archaea; Euryarchaeota; Methanomicrobia; Methanomicrobiales; Methanoregulaceae; Methanoregula
Archaea; Euryarchaeota; Methanomicrobia; Methanomicrobiales; Methanoregulaceae; Methanoregula
Archaea; Euryarchaeota; Methanomicrobia; Methanomicrobiales; Methanoregulaceae; Methanoregula
Archaea; Euryarchaeota; Methanomicrobia; Methanomicrobiales; Methanoregulaceae; Methanoregula
Archaea; Euryarchaeota; Methanomicrobia; Methanomicrobiales; Methanoregulaceae; Methanoregula
Archaea; Euryarchaeota; Methanomicrobia; Methanomicrobiales; Methanoregulaceae; Methanoregula
Archaea; Euryarchaeota; Methanomicrobia; Methanomicrobiales; Methanoregulaceae; Methanoregula
Archaea; Euryarchaeota; Methanomicrobia; Methanomicrobiales; Methanoregulaceae; Methanoregula
Archaea; Euryarchaeota; Methanomicrobia; Methanomicrobiales; Methanoregulaceae; Methanoregula
Archaea; Euryarchaeota; Methanomicrobia; Methanomicrobiales; Methanoregulaceae; Methanoregula
Archaea; Euryarchaeota; Methanomicrobia; Methanomicrobiales; Methanoregulaceae; Methanoregula
Archaea; Euryarchaeota; Methanomicrobia; Methanomicrobiales; Methanoregulaceae; Methanoregula
Archaea; Euryarchaeota; Methanomicrobia; Methanomicrobiales; Methanoregulaceae; Methanoregula
Archaea; Euryarchaeota; Methanomicrobia; Methanomicrobiales; Methanoregulaceae; Methanoregula
Archaea; Euryarchaeota; Methanomicrobia; Methanomicrobiales; Methanoregulaceae; Methanoregula
Archaea; Euryarchaeota; Methanomicrobia; Methanomicrobiales; Methanoregulaceae; Methanoregula
Archaea; Euryarchaeota; Methanomicrobia; Methanomicrobiales; Methanoregulaceae; Methanoregula
Archaea; Euryarchaeota; Methanomicrobia; Methanomicrobiales; Methanoregulaceae; Methanoregula
Archaea; Euryarchaeota; Methanomicrobia; Methanomicrobiales; Methanoregulaceae; Methanoregula
Archaea; Euryarchaeota; Methanomicrobia; Methanomicrobiales; Methanoregulaceae; Methanoregula
Archaea; Euryarchaeota; Methanomicrobia; Methanomicrobiales; Methanoregulaceae; Methanoregula
Archaea; Euryarchaeota; Methanomicrobia; Methanomicrobiales; Methanoregulaceae; Methanoregula
Archaea; Euryarchaeota; Methanomicrobia; Methanomicrobiales; Methanoregulaceae; Methanoregula
Archaea; Euryarchaeota; Methanomicrobia; Methanomicrobiales; Methanoregulaceae; Methanoregula
Archaea; Euryarchaeota; Methanomicrobia; Methanomicrobiales; Methanoregulaceae; Methanoregula
Archaea; Euryarchaeota; Methanomicrobia; Methanomicrobiales; Methanoregulaceae; Methanoregula
Archaea; Euryarchaeota; Methanomicrobia; Methanomicrobiales; Methanoregulaceae; Methanoregula
Archaea; Euryarchaeota; Methanomicrobia; Methanomicrobiales; Methanoregulaceae; Methanoregula
Archaea; Euryarchaeota; Methanomicrobia; Methanomicrobiales; Methanoregulaceae; Methanoregula
Archaea; Euryarchaeota; Methanomicrobia; Methanomicrobiales; Methanoregulaceae; Methanoregula
Archaea; Euryarchaeota; Methanomicrobia; Methanomicrobiales; Methanoregulaceae; Methanoregula
Archaea; Euryarchaeota; Methanomicrobia; Methanomicrobiales; Methanoregulaceae; Methanoregula
Archaea; Euryarchaeota; Methanomicrobia; Methanomicrobiales; Methanoregulaceae; Methanoregula
Archaea; Euryarchaeota; Methanomicrobia; Methanomicrobiales; Methanoregulaceae; Methanoregula
Archaea; Euryarchaeota; Methanomicrobia; Methanomicrobiales; Methanoregulaceae; Methanoregula
Archaea; Euryarchaeota; Methanomicrobia; Methanomicrobiales; Methanoregulaceae; Methanoregula
Archaea; Euryarchaeota; Methanomicrobia; Methanomicrobiales; Methanoregulaceae; Methanoregula
Archaea; Euryarchaeota; Methanomicrobia; Methanomicrobiales; Methanoregulaceae; Methanoregula
Archaea; Euryarchaeota; Methanomicrobia; Methanomicrobiales; Methanoregulaceae; Methanoregula
Archaea; Euryarchaeota; Methanomicrobia; Methanomicrobiales; Methanoregulaceae; Methanoregula
Archaea; Euryarchaeota; Methanomicrobia; Methanomicrobiales; Methanoregulaceae; Methanoregula
Archaea; Euryarchaeota; Methanomicrobia; Methanomicrobiales; Methanoregulaceae; Methanoregula
Archaea; Euryarchaeota; Methanomicrobia; Methanomicrobiales; Methanoregulaceae; Methanoregula
Archaea; Euryarchaeota; Methanomicrobia; Methanomicrobiales; Methanoregulaceae; Methanoregula
Archaea; Euryarchaeota; Methanomicrobia; Methanomicrobiales; Methanoregulaceae; Methanoregula
Archaea; Euryarchaeota; Methanomicrobia; Methanomicrobiales; Methanoregulaceae; Methanoregula
Archaea; Euryarchaeota; Methanomicrobia; Methanomicrobiales; Methanoregulaceae; Methanoregula
Archaea; Euryarchaeota; Methanomicrobia; Methanomicrobiales; Methanoregulaceae; Methanoregula
Archaea; Euryarchaeota; Methanomicrobia; Methanomicrobiales; Methanoregulaceae; Methanoregula
Archaea; Euryarchaeota; Methanomicrobia; Methanomicrobiales; Methanoregulaceae; Methanoregula
Archaea; Euryarchaeota; Methanomicrobia; Methanomicrobiales; Methanoregulaceae; Methanoregula
Archaea; Euryarchaeota; Methanomicrobia; Methanomicrobiales; Methanoregulaceae; Methanoregula
Archaea; Euryarchaeota; Methanomicrobia; Methanomicrobiales; Methanoregulaceae; Methanoregula
Archaea; Euryarchaeota; Methanomicrobia; Methanomicrobiales; Methanoregulaceae; Methanoregula
Archaea; Euryarchaeota; Methanomicrobia; Methanomicrobiales; Methanoregulaceae; Methanoregula
Archaea; Euryarchaeota; Methanomicrobia; Methanomicrobiales; Methanoregulaceae; Methanoregula
Archaea; Euryarchaeota; Methanomicrobia; Methanomicrobiales; Methanoregulaceae; Methanoregula
Archaea; Euryarchaeota; Methanomicrobia; Methanomicrobiales; Methanoregulaceae; Methanoregula
Archaea; Euryarchaeota; Methanomicrobia; Methanomicrobiales; Methanoregulaceae; Methanoregula
Archaea; Euryarchaeota; Methanomicrobia; Methanomicrobiales; Methanoregulaceae; Methanoregula
Archaea; Euryarchaeota; Methanomicrobia; Methanomicrobiales; Methanoregulaceae; Methanoregula
Archaea; Euryarchaeota; Methanomicrobia; Methanomicrobiales; Methanoregulaceae; Methanoregula
Archaea; Euryarchaeota; Methanomicrobia; Methanomicrobiales; Methanoregulaceae; Methanoregula
Archaea; Euryarchaeota; Methanomicrobia; Methanomicrobiales; Methanoregulaceae; Methanoregula
Archaea; Euryarchaeota; Methanomicrobia; Methanomicrobiales; Methanoregulaceae; Methanoregula
Archaea; Euryarchaeota; Methanomicrobia; Methanomicrobiales; Methanoregulaceae; Methanoregula
Archaea; Euryarchaeota; Methanomicrobia; Methanomicrobiales; Methanoregulaceae; Methanoregula
Archaea; Euryarchaeota; Methanomicrobia; Methanomicrobiales; Methanoregulaceae; Methanoregula
Archaea; Euryarchaeota; Methanomicrobia; Methanomicrobiales; Methanoregulaceae; Methanoregula
Archaea; Euryarchaeota; Methanomicrobia; Methanomicrobiales; Methanoregulaceae; Methanoregula
Archaea; Euryarchaeota; Methanomicrobia; Methanomicrobiales; Methanoregulaceae; Methanoregula
Archaea; Euryarchaeota; Methanomicrobia; Methanomicrobiales; Methanoregulaceae; Methanoregula
Archaea; Euryarchaeota; Methanomicrobia; Methanomicrobiales; Methanoregulaceae; Methanoregula
Archaea; Euryarchaeota; Methanomicrobia; Methanomicrobiales; Methanoregulaceae; Methanoregula
Archaea; Euryarchaeota; Methanomicrobia; Methanomicrobiales; Methanoregulaceae; Methanoregula
Archaea; Euryarchaeota; Methanomicrobia; Methanomicrobiales; Methanoregulaceae; Methanoregula
Archaea; Euryarchaeota; Methanomicrobia; Methanomicrobiales; Methanoregulaceae; Methanoregula
Archaea; Euryarchaeota; Methanomicrobia; Methanomicrobiales; Methanoregulaceae; Methanoregula
Archaea; Euryarchaeota; Methanomicrobia; Methanomicrobiales; Methanoregulaceae; Methanoregula
Archaea; Euryarchaeota; Methanomicrobia; Methanomicrobiales; Methanoregulaceae; Methanoregula
Archaea; Euryarchaeota; Methanomicrobia; Methanomicrobiales; Methanoregulaceae; Methanoregula
Archaea; Euryarchaeota; Methanomicrobia; Methanomicrobiales; Methanoregulaceae; Methanoregula
Archaea; Euryarchaeota; Methanomicrobia; Methanomicrobiales; Methanoregulaceae; Methanoregula
Archaea; Euryarchaeota; Methanomicrobia; Methanomicrobiales; Methanoregulaceae; Methanoregula
Archaea; Euryarchaeota; Methanomicrobia; Methanomicrobiales; Methanoregulaceae; Methanoregula
Archaea; Euryarchaeota; Methanomicrobia; Methanomicrobiales; Methanoregulaceae; Methanoregula
Archaea; Euryarchaeota; Methanomicrobia; Methanomicrobiales; Methanoregulaceae; Methanoregula
Archaea; Euryarchaeota; Methanomicrobia; Methanomicrobiales; Methanoregulaceae; Methanoregula
Archaea; Euryarchaeota; Methanomicrobia; Methanomicrobiales; Methanoregulaceae; Methanoregula
Archaea; Euryarchaeota; Methanomicrobia; Methanomicrobiales; Methanoregulaceae; Methanoregula
Archaea; Euryarchaeota; Methanomicrobia; Methanomicrobiales; Methanoregulaceae; Methanoregula
Archaea; Euryarchaeota; Methanomicrobia; Methanomicrobiales; Methanoregulaceae; Methanoregula
Archaea; Euryarchaeota; Methanomicrobia; Methanomicrobiales; Methanoregulaceae; Methanoregula
Archaea; Euryarchaeota; Methanomicrobia; Methanomicrobiales; Methanoregulaceae; Methanoregula
Archaea; Euryarchaeota; Methanomicrobia; Methanomicrobiales; Methanoregulaceae; Methanoregula
Archaea; Euryarchaeota; Methanomicrobia; Methanomicrobiales; Methanoregulaceae; Methanoregula
Archaea; Euryarchaeota; Methanomicrobia; Methanomicrobiales; Methanoregulaceae; Methanoregula
Archaea; Euryarchaeota; Methanomicrobia; Methanomicrobiales; Methanoregulaceae; Methanoregula
Archaea; Euryarchaeota; Methanomicrobia; Methanomicrobiales; Methanoregulaceae; Methanoregula
Archaea; Euryarchaeota; Methanomicrobia; Methanomicrobiales; Methanoregulaceae; Methanoregula
Archaea; Euryarchaeota; Methanomicrobia; Methanomicrobiales; Methanoregulaceae; Methanoregula
Archaea; Euryarchaeota; Methanomicrobia; Methanomicrobiales; Methanoregulaceae; Methanoregula
Archaea; Euryarchaeota; Methanomicrobia; Methanomicrobiales; Methanoregulaceae; Methanoregula
Archaea; Euryarchaeota; Methanomicrobia; Methanomicrobiales; Methanoregulaceae; Methanoregula
Archaea; Euryarchaeota; Methanomicrobia; Methanomicrobiales; Methanoregulaceae; Methanoregula
Archaea; Euryarchaeota; Methanomicrobia; Methanomicrobiales; Methanoregulaceae; Methanoregula
Archaea; Euryarchaeota; Methanomicrobia; Methanomicrobiales; Methanoregulaceae; Methanoregula
Archaea; Euryarchaeota; Methanomicrobia; Methanomicrobiales; Methanoregulaceae; Methanoregula
Archaea; Euryarchaeota; Methanomicrobia; Methanomicrobiales; Methanoregulaceae; Methanoregula
Archaea; Euryarchaeota; Methanomicrobia; Methanomicrobiales; Methanoregulaceae; Methanoregula
Archaea; Euryarchaeota; Methanomicrobia; Methanomicrobiales; Methanoregulaceae; Methanoregula
Archaea; Euryarchaeota; Methanomicrobia; Methanomicrobiales; Methanoregulaceae; Methanoregula
Archaea; Euryarchaeota; Methanomicrobia; Methanomicrobiales; Methanoregulaceae; Methanoregula
Archaea; Euryarchaeota; Methanomicrobia; Methanomicrobiales; Methanoregulaceae; Methanoregula
Archaea; Euryarchaeota; Methanomicrobia; Methanomicrobiales; Methanoregulaceae; Methanoregula
Archaea; Euryarchaeota; Methanomicrobia; Methanomicrobiales; Methanoregulaceae; Methanoregula
Archaea; Euryarchaeota; Methanomicrobia; Methanomicrobiales; Methanoregulaceae; Methanoregula
Archaea; Euryarchaeota; Methanomicrobia; Methanomicrobiales; Methanoregulaceae; Methanoregula
Archaea; Euryarchaeota; Methanomicrobia; Methanomicrobiales; Methanoregulaceae; Methanoregula
Archaea; Euryarchaeota; Methanomicrobia; Methanomicrobiales; Methanoregulaceae; Methanoregula
Archaea; Euryarchaeota; Methanomicrobia; Methanomicrobiales; Methanoregulaceae; Methanoregulaceae_unclassified
Archaea; Euryarchaeota; Methanomicrobia; Methanomicrobiales; Methanoregulaceae; Methanosphaerula
Archaea; Euryarchaeota; Methanomicrobia; Methanomicrobiales; Methanoregulaceae; Methanosphaerula
Archaea; Euryarchaeota; Methanomicrobia; Methanomicrobiales; Methanoregulaceae; Methanosphaerula
Archaea; Euryarchaeota; Methanomicrobia; Methanomicrobiales; Methanoregulaceae; Methanosphaerula
Archaea; Euryarchaeota; Methanomicrobia; Methanomicrobiales; Methanoregulaceae; Methanosphaerula
Archaea; Euryarchaeota; Methanomicrobia; Methanomicrobiales; Methanoregulaceae; Methanosphaerula
Archaea; Euryarchaeota; Methanomicrobia; Methanomicrobiales; Methanoregulaceae; Methanosphaerula
Archaea; Euryarchaeota; Methanomicrobia; Methanomicrobiales; Methanoregulaceae; Methanosphaerula
Archaea; Euryarchaeota; Methanomicrobia; Methanomicrobiales; Methanoregulaceae; Methanosphaerula
Archaea; Euryarchaeota; Methanomicrobia; Methanomicrobiales; Methanoregulaceae; Methanosphaerula
Archaea; Euryarchaeota; Methanomicrobia; Methanomicrobiales; Methanoregulaceae; Methanosphaerula
Archaea; Euryarchaeota; Methanomicrobia; Methanomicrobiales; Methanoregulaceae; Methanosphaerula
Archaea; Euryarchaeota; Methanomicrobia; Methanomicrobiales; Methanoregulaceae; Methanosphaerula
Archaea; Euryarchaeota; Methanomicrobia; Methanomicrobiales; Methanoregulaceae; Methanosphaerula
Archaea; Euryarchaeota; Methanomicrobia; Methanomicrobiales; Methanoregulaceae; Methanosphaerula
Archaea; Euryarchaeota; Methanomicrobia; Methanomicrobiales; Methanoregulaceae; Methanosphaerula
Archaea; Euryarchaeota; Methanomicrobia; Methanomicrobiales; Methanoregulaceae; Methanosphaerula
Archaea; Euryarchaeota; Methanomicrobia; Methanomicrobiales; Methanoregulaceae; Methanosphaerula
Archaea; Euryarchaeota; Methanomicrobia; Methanomicrobiales; Methanoregulaceae; Methanosphaerula
Archaea; Euryarchaeota; Methanomicrobia; Methanomicrobiales; Methanoregulaceae; Methanosphaerula
Archaea; Euryarchaeota; Methanomicrobia; Methanomicrobiales; Methanoregulaceae; Methanosphaerula
Archaea; Euryarchaeota; Methanomicrobia; Methanomicrobiales; Methanoregulaceae; Methanosphaerula
Archaea; Euryarchaeota; Methanomicrobia; Methanomicrobiales; Methanoregulaceae; Methanosphaerula
Archaea; Euryarchaeota; Methanomicrobia; Methanomicrobiales; Methanoregulaceae; Methanosphaerula
Archaea; Euryarchaeota; Methanomicrobia; Methanomicrobiales; Methanoregulaceae; Methanosphaerula
Archaea; Euryarchaeota; Methanomicrobia; Methanomicrobiales; Methanoregulaceae; Methanosphaerula
Archaea; Euryarchaeota; Methanomicrobia; Methanomicrobiales; Methanoregulaceae; Methanosphaerula
Archaea; Euryarchaeota; Methanomicrobia; Methanomicrobiales; Methanoregulaceae; Methanosphaerula
Archaea; Euryarchaeota; Methanomicrobia; Methanomicrobiales; Methanoregulaceae; Methanosphaerula
Archaea; Euryarchaeota; Methanomicrobia; Methanomicrobiales; Methanoregulaceae; Methanosphaerula
Archaea; Euryarchaeota; Methanomicrobia; Methanomicrobiales; Methanoregulaceae; Methanosphaerula
Archaea; Euryarchaeota; Methanomicrobia; Methanomicrobiales; Methanoregulaceae; Methanosphaerula
Archaea; Euryarchaeota; Methanomicrobia; Methanomicrobiales; Methanoregulaceae; Methanosphaerula
Archaea; Euryarchaeota; Methanomicrobia; Methanomicrobiales; Methanoregulaceae; Methanosphaerula
Archaea; Euryarchaeota; Methanomicrobia; Methanomicrobiales; Methanoregulaceae; Methanosphaerula
Archaea; Euryarchaeota; Methanomicrobia; Methanomicrobiales; Methanoregulaceae; Methanosphaerula
Archaea; Euryarchaeota; Methanomicrobia; Methanomicrobiales; Methanoregulaceae; Methanosphaerula
Archaea; Euryarchaeota; Methanomicrobia; Methanomicrobiales; Methanoregulaceae; Methanosphaerula
Archaea; Euryarchaeota; Methanomicrobia; Methanomicrobiales; Methanoregulaceae; Methanosphaerula
Archaea; Euryarchaeota; Methanomicrobia; Methanomicrobiales; Methanoregulaceae; Methanosphaerula
Archaea; Euryarchaeota; Methanomicrobia; Methanomicrobiales; Methanoregulaceae; Methanosphaerula
Archaea; Euryarchaeota; Methanomicrobia; Methanomicrobiales; Methanoregulaceae; Methanosphaerula
Archaea; Euryarchaeota; Methanomicrobia; Methanomicrobiales; Methanoregulaceae; Methanosphaerula
Archaea; Euryarchaeota; Methanomicrobia; Methanomicrobiales; Methanoregulaceae; Methanosphaerula
Archaea; Euryarchaeota; Methanomicrobia; Methanomicrobiales; Methanoregulaceae; Methanosphaerula
Archaea; Euryarchaeota; Methanomicrobia; Methanomicrobiales; Methanoregulaceae; Methanosphaerula
Archaea; Euryarchaeota; Methanomicrobia; Methanomicrobiales; Methanoregulaceae; Methanosphaerula
Archaea; Euryarchaeota; Methanomicrobia; Methanomicrobiales; Methanoregulaceae; Methanosphaerula
Archaea; Euryarchaeota; Methanomicrobia; Methanomicrobiales; Methanoregulaceae; Methanosphaerula
Archaea; Euryarchaeota; Methanomicrobia; Methanomicrobiales; Methanoregulaceae; Methanosphaerula
Archaea; Euryarchaeota; Methanomicrobia; Methanomicrobiales; Methanoregulaceae; Methanosphaerula
Archaea; Euryarchaeota; Methanomicrobia; Methanomicrobiales; Methanoregulaceae; Methanosphaerula
Archaea; Euryarchaeota; Methanomicrobia; Methanomicrobiales; Methanoregulaceae; Methanosphaerula
Archaea; Euryarchaeota; Methanomicrobia; Methanomicrobiales; Methanoregulaceae; Methanosphaerula
Archaea; Euryarchaeota; Methanomicrobia; Methanomicrobiales; Methanoregulaceae; Methanosphaerula
Archaea; Euryarchaeota; Methanomicrobia; Methanomicrobiales; Methanoregulaceae; Methanosphaerula
Archaea; Euryarchaeota; Methanomicrobia; Methanomicrobiales; Methanoregulaceae; Methanosphaerula
Archaea; Euryarchaeota; Methanomicrobia; Methanomicrobiales; Methanoregulaceae; Methanosphaerula
Archaea; Euryarchaeota; Methanomicrobia; Methanomicrobiales; Methanoregulaceae; Methanosphaerula
Archaea; Euryarchaeota; Methanomicrobia; Methanomicrobiales; Methanoregulaceae; Methanosphaerula
Archaea; Euryarchaeota; Methanomicrobia; Methanomicrobiales; Methanoregulaceae; Methanosphaerula
Archaea; Euryarchaeota; Methanomicrobia; Methanomicrobiales; Methanoregulaceae; Methanosphaerula
Archaea; Euryarchaeota; Methanomicrobia; Methanomicrobiales; Methanoregulaceae; Methanosphaerula
Archaea; Euryarchaeota; Methanomicrobia; Methanomicrobiales; Methanoregulaceae; Methanosphaerula
Archaea; Euryarchaeota; Methanomicrobia; Methanomicrobiales; Methanoregulaceae; Methanosphaerula
Archaea; Euryarchaeota; Methanomicrobia; Methanomicrobiales; Methanoregulaceae; Methanosphaerula
Archaea; Euryarchaeota; Methanomicrobia; Methanomicrobiales; Methanospirillaceae; Methanospirillum
Archaea; Euryarchaeota; Methanomicrobia; Methanomicrobiales; Methanospirillaceae; Methanospirillum
Archaea; Euryarchaeota; Methanomicrobia; Methanomicrobiales; Methanospirillaceae; Methanospirillum
Archaea; Euryarchaeota; Methanomicrobia; Methanomicrobiales; Rice_Cluster_II; Rice_Cluster_II_ge
Archaea; Euryarchaeota; Methanomicrobia; Methanomicrobiales; Rice_Cluster_II; Rice_Cluster_II_ge
Archaea; Euryarchaeota; Methanomicrobia; Methanomicrobiales; Rice_Cluster_II; Rice_Cluster_II_ge
Archaea; Euryarchaeota; Methanomicrobia; Methanomicrobiales; Rice_Cluster_II; Rice_Cluster_II_ge
Archaea; Euryarchaeota; Methanomicrobia; Methanomicrobiales; Rice_Cluster_II; Rice_Cluster_II_ge
Archaea; Euryarchaeota; Methanomicrobia; Methanomicrobiales; Rice_Cluster_II; Rice_Cluster_II_ge
Archaea; Euryarchaeota; Methanomicrobia; Methanomicrobiales; Rice_Cluster_II; Rice_Cluster_II_ge
Archaea; Euryarchaeota; Methanomicrobia; Methanomicrobiales; Rice_Cluster_II; Rice_Cluster_II_ge
Archaea; Euryarchaeota; Methanomicrobia; Methanomicrobiales; Rice_Cluster_II; Rice_Cluster_II_ge
Archaea; Euryarchaeota; Methanomicrobia; Methanomicrobiales; Rice_Cluster_II; Rice_Cluster_II_ge
Archaea; Euryarchaeota; Methanomicrobia; Methanomicrobiales; Rice_Cluster_II; Rice_Cluster_II_ge
Archaea; Euryarchaeota; Methanomicrobia; Methanomicrobiales; Rice_Cluster_II; Rice_Cluster_II_ge
Archaea; Euryarchaeota; Methanomicrobia; Methanomicrobiales; Rice_Cluster_II; Rice_Cluster_II_ge
Archaea; Euryarchaeota; Methanomicrobia; Methanomicrobiales; Rice_Cluster_II; Rice_Cluster_II_ge
Archaea; Euryarchaeota; Methanomicrobia; Methanomicrobiales; Rice_Cluster_II; Rice_Cluster_II_ge
Archaea; Euryarchaeota; Methanomicrobia; Methanomicrobiales; Rice_Cluster_II; Rice_Cluster_II_ge
Archaea; Euryarchaeota; Methanomicrobia; Methanomicrobiales; Rice_Cluster_II; Rice_Cluster_II_ge
Archaea; Euryarchaeota; Methanomicrobia; Methanomicrobiales; Rice_Cluster_II; Rice_Cluster_II_ge
Archaea; Euryarchaeota; Methanomicrobia; Methanomicrobiales; Rice_Cluster_II; Rice_Cluster_II_ge
Archaea; Euryarchaeota; Methanomicrobia; Methanomicrobiales; Rice_Cluster_II; Rice_Cluster_II_ge
Archaea; Euryarchaeota; Methanomicrobia; Methanomicrobiales; Rice_Cluster_II; Rice_Cluster_II_ge
Archaea; Euryarchaeota; Methanomicrobia; Methanomicrobiales; Rice_Cluster_II; Rice_Cluster_II_ge
Archaea; Euryarchaeota; Methanomicrobia; Methanomicrobiales; Rice_Cluster_II; Rice_Cluster_II_ge
Archaea; Euryarchaeota; Methanomicrobia; Methanomicrobiales; Rice_Cluster_II; Rice_Cluster_II_ge
Archaea; Euryarchaeota; Methanomicrobia; Methanosarcinales; Methanosarcinaceae; Methanosarcina
Archaea; Euryarchaeota; Methanomicrobia; Methanosarcinales; Methanosarcinaceae; Methanosarcina
Archaea; Euryarchaeota; Methanomicrobia; Methanosarcinales; Methanosarcinaceae; Methanosarcina
Archaea; Euryarchaeota; Methanomicrobia; Methanosarcinales; Methanosarcinaceae; Methanosarcina
Archaea; Euryarchaeota; Methanomicrobia; Methanosarcinales; Methanosarcinaceae; Methanosarcina
# hydrogenotrophic_methanogenesis (291 records):
Archaea; Euryarchaeota; Methanobacteria; Methanobacteriales; Methanobacteriaceae; Methanobacterium
Archaea; Euryarchaeota; Methanobacteria; Methanobacteriales; Methanobacteriaceae; Methanobacterium
Archaea; Euryarchaeota; Methanobacteria; Methanobacteriales; Methanobacteriaceae; Methanobacterium
Archaea; Euryarchaeota; Methanobacteria; Methanobacteriales; Methanobacteriaceae; Methanobacterium
Archaea; Euryarchaeota; Methanobacteria; Methanobacteriales; Methanobacteriaceae; Methanobacterium
Archaea; Euryarchaeota; Methanobacteria; Methanobacteriales; Methanobacteriaceae; Methanobacterium
Archaea; Euryarchaeota; Methanobacteria; Methanobacteriales; Methanobacteriaceae; Methanobacterium
Archaea; Euryarchaeota; Methanobacteria; Methanobacteriales; Methanobacteriaceae; Methanobacterium
Archaea; Euryarchaeota; Methanobacteria; Methanobacteriales; Methanobacteriaceae; Methanobacterium
Archaea; Euryarchaeota; Methanobacteria; Methanobacteriales; Methanobacteriaceae; Methanobacterium
Archaea; Euryarchaeota; Methanomicrobia; Methanomicrobiales; Methanomicrobiales_unclassified; Methanomicrobiales_unclassified
Archaea; Euryarchaeota; Methanomicrobia; Methanomicrobiales; Methanomicrobiales_unclassified; Methanomicrobiales_unclassified
Archaea; Euryarchaeota; Methanomicrobia; Methanomicrobiales; Methanomicrobiales_unclassified; Methanomicrobiales_unclassified
Archaea; Euryarchaeota; Methanomicrobia; Methanomicrobiales; Methanomicrobiales_unclassified; Methanomicrobiales_unclassified
Archaea; Euryarchaeota; Methanomicrobia; Methanomicrobiales; Methanomicrobiales_unclassified; Methanomicrobiales_unclassified
Archaea; Euryarchaeota; Methanomicrobia; Methanomicrobiales; Methanomicrobiales_unclassified; Methanomicrobiales_unclassified
Archaea; Euryarchaeota; Methanomicrobia; Methanomicrobiales; Methanoregulaceae; Methanolinea
Archaea; Euryarchaeota; Methanomicrobia; Methanomicrobiales; Methanoregulaceae; Methanolinea
Archaea; Euryarchaeota; Methanomicrobia; Methanomicrobiales; Methanoregulaceae; Methanoregula
Archaea; Euryarchaeota; Methanomicrobia; Methanomicrobiales; Methanoregulaceae; Methanoregula
Archaea; Euryarchaeota; Methanomicrobia; Methanomicrobiales; Methanoregulaceae; Methanoregula
Archaea; Euryarchaeota; Methanomicrobia; Methanomicrobiales; Methanoregulaceae; Methanoregula
Archaea; Euryarchaeota; Methanomicrobia; Methanomicrobiales; Methanoregulaceae; Methanoregula
Archaea; Euryarchaeota; Methanomicrobia; Methanomicrobiales; Methanoregulaceae; Methanoregula
Archaea; Euryarchaeota; Methanomicrobia; Methanomicrobiales; Methanoregulaceae; Methanoregula
Archaea; Euryarchaeota; Methanomicrobia; Methanomicrobiales; Methanoregulaceae; Methanoregula
Archaea; Euryarchaeota; Methanomicrobia; Methanomicrobiales; Methanoregulaceae; Methanoregula
Archaea; Euryarchaeota; Methanomicrobia; Methanomicrobiales; Methanoregulaceae; Methanoregula
Archaea; Euryarchaeota; Methanomicrobia; Methanomicrobiales; Methanoregulaceae; Methanoregula
Archaea; Euryarchaeota; Methanomicrobia; Methanomicrobiales; Methanoregulaceae; Methanoregula
Archaea; Euryarchaeota; Methanomicrobia; Methanomicrobiales; Methanoregulaceae; Methanoregula
Archaea; Euryarchaeota; Methanomicrobia; Methanomicrobiales; Methanoregulaceae; Methanoregula
Archaea; Euryarchaeota; Methanomicrobia; Methanomicrobiales; Methanoregulaceae; Methanoregula
Archaea; Euryarchaeota; Methanomicrobia; Methanomicrobiales; Methanoregulaceae; Methanoregula
Archaea; Euryarchaeota; Methanomicrobia; Methanomicrobiales; Methanoregulaceae; Methanoregula
Archaea; Euryarchaeota; Methanomicrobia; Methanomicrobiales; Methanoregulaceae; Methanoregula
Archaea; Euryarchaeota; Methanomicrobia; Methanomicrobiales; Methanoregulaceae; Methanoregula
Archaea; Euryarchaeota; Methanomicrobia; Methanomicrobiales; Methanoregulaceae; Methanoregula
Archaea; Euryarchaeota; Methanomicrobia; Methanomicrobiales; Methanoregulaceae; Methanoregula
Archaea; Euryarchaeota; Methanomicrobia; Methanomicrobiales; Methanoregulaceae; Methanoregula
Archaea; Euryarchaeota; Methanomicrobia; Methanomicrobiales; Methanoregulaceae; Methanoregula
Archaea; Euryarchaeota; Methanomicrobia; Methanomicrobiales; Methanoregulaceae; Methanoregula
Archaea; Euryarchaeota; Methanomicrobia; Methanomicrobiales; Methanoregulaceae; Methanoregula
Archaea; Euryarchaeota; Methanomicrobia; Methanomicrobiales; Methanoregulaceae; Methanoregula
Archaea; Euryarchaeota; Methanomicrobia; Methanomicrobiales; Methanoregulaceae; Methanoregula
Archaea; Euryarchaeota; Methanomicrobia; Methanomicrobiales; Methanoregulaceae; Methanoregula
Archaea; Euryarchaeota; Methanomicrobia; Methanomicrobiales; Methanoregulaceae; Methanoregula
Archaea; Euryarchaeota; Methanomicrobia; Methanomicrobiales; Methanoregulaceae; Methanoregula
Archaea; Euryarchaeota; Methanomicrobia; Methanomicrobiales; Methanoregulaceae; Methanoregula
Archaea; Euryarchaeota; Methanomicrobia; Methanomicrobiales; Methanoregulaceae; Methanoregula
Archaea; Euryarchaeota; Methanomicrobia; Methanomicrobiales; Methanoregulaceae; Methanoregula
Archaea; Euryarchaeota; Methanomicrobia; Methanomicrobiales; Methanoregulaceae; Methanoregula
Archaea; Euryarchaeota; Methanomicrobia; Methanomicrobiales; Methanoregulaceae; Methanoregula
Archaea; Euryarchaeota; Methanomicrobia; Methanomicrobiales; Methanoregulaceae; Methanoregula
Archaea; Euryarchaeota; Methanomicrobia; Methanomicrobiales; Methanoregulaceae; Methanoregula
Archaea; Euryarchaeota; Methanomicrobia; Methanomicrobiales; Methanoregulaceae; Methanoregula
Archaea; Euryarchaeota; Methanomicrobia; Methanomicrobiales; Methanoregulaceae; Methanoregula
Archaea; Euryarchaeota; Methanomicrobia; Methanomicrobiales; Methanoregulaceae; Methanoregula
Archaea; Euryarchaeota; Methanomicrobia; Methanomicrobiales; Methanoregulaceae; Methanoregula
Archaea; Euryarchaeota; Methanomicrobia; Methanomicrobiales; Methanoregulaceae; Methanoregula
Archaea; Euryarchaeota; Methanomicrobia; Methanomicrobiales; Methanoregulaceae; Methanoregula
Archaea; Euryarchaeota; Methanomicrobia; Methanomicrobiales; Methanoregulaceae; Methanoregula
Archaea; Euryarchaeota; Methanomicrobia; Methanomicrobiales; Methanoregulaceae; Methanoregula
Archaea; Euryarchaeota; Methanomicrobia; Methanomicrobiales; Methanoregulaceae; Methanoregula
Archaea; Euryarchaeota; Methanomicrobia; Methanomicrobiales; Methanoregulaceae; Methanoregula
Archaea; Euryarchaeota; Methanomicrobia; Methanomicrobiales; Methanoregulaceae; Methanoregula
Archaea; Euryarchaeota; Methanomicrobia; Methanomicrobiales; Methanoregulaceae; Methanoregula
Archaea; Euryarchaeota; Methanomicrobia; Methanomicrobiales; Methanoregulaceae; Methanoregula
Archaea; Euryarchaeota; Methanomicrobia; Methanomicrobiales; Methanoregulaceae; Methanoregula
Archaea; Euryarchaeota; Methanomicrobia; Methanomicrobiales; Methanoregulaceae; Methanoregula
Archaea; Euryarchaeota; Methanomicrobia; Methanomicrobiales; Methanoregulaceae; Methanoregula
Archaea; Euryarchaeota; Methanomicrobia; Methanomicrobiales; Methanoregulaceae; Methanoregula
Archaea; Euryarchaeota; Methanomicrobia; Methanomicrobiales; Methanoregulaceae; Methanoregula
Archaea; Euryarchaeota; Methanomicrobia; Methanomicrobiales; Methanoregulaceae; Methanoregula
Archaea; Euryarchaeota; Methanomicrobia; Methanomicrobiales; Methanoregulaceae; Methanoregula
Archaea; Euryarchaeota; Methanomicrobia; Methanomicrobiales; Methanoregulaceae; Methanoregula
Archaea; Euryarchaeota; Methanomicrobia; Methanomicrobiales; Methanoregulaceae; Methanoregula
Archaea; Euryarchaeota; Methanomicrobia; Methanomicrobiales; Methanoregulaceae; Methanoregula
Archaea; Euryarchaeota; Methanomicrobia; Methanomicrobiales; Methanoregulaceae; Methanoregula
Archaea; Euryarchaeota; Methanomicrobia; Methanomicrobiales; Methanoregulaceae; Methanoregula
Archaea; Euryarchaeota; Methanomicrobia; Methanomicrobiales; Methanoregulaceae; Methanoregula
Archaea; Euryarchaeota; Methanomicrobia; Methanomicrobiales; Methanoregulaceae; Methanoregula
Archaea; Euryarchaeota; Methanomicrobia; Methanomicrobiales; Methanoregulaceae; Methanoregula
Archaea; Euryarchaeota; Methanomicrobia; Methanomicrobiales; Methanoregulaceae; Methanoregula
Archaea; Euryarchaeota; Methanomicrobia; Methanomicrobiales; Methanoregulaceae; Methanoregula
Archaea; Euryarchaeota; Methanomicrobia; Methanomicrobiales; Methanoregulaceae; Methanoregula
Archaea; Euryarchaeota; Methanomicrobia; Methanomicrobiales; Methanoregulaceae; Methanoregula
Archaea; Euryarchaeota; Methanomicrobia; Methanomicrobiales; Methanoregulaceae; Methanoregula
Archaea; Euryarchaeota; Methanomicrobia; Methanomicrobiales; Methanoregulaceae; Methanoregula
Archaea; Euryarchaeota; Methanomicrobia; Methanomicrobiales; Methanoregulaceae; Methanoregula
Archaea; Euryarchaeota; Methanomicrobia; Methanomicrobiales; Methanoregulaceae; Methanoregula
Archaea; Euryarchaeota; Methanomicrobia; Methanomicrobiales; Methanoregulaceae; Methanoregula
Archaea; Euryarchaeota; Methanomicrobia; Methanomicrobiales; Methanoregulaceae; Methanoregula
Archaea; Euryarchaeota; Methanomicrobia; Methanomicrobiales; Methanoregulaceae; Methanoregula
Archaea; Euryarchaeota; Methanomicrobia; Methanomicrobiales; Methanoregulaceae; Methanoregula
Archaea; Euryarchaeota; Methanomicrobia; Methanomicrobiales; Methanoregulaceae; Methanoregula
Archaea; Euryarchaeota; Methanomicrobia; Methanomicrobiales; Methanoregulaceae; Methanoregula
Archaea; Euryarchaeota; Methanomicrobia; Methanomicrobiales; Methanoregulaceae; Methanoregula
Archaea; Euryarchaeota; Methanomicrobia; Methanomicrobiales; Methanoregulaceae; Methanoregula
Archaea; Euryarchaeota; Methanomicrobia; Methanomicrobiales; Methanoregulaceae; Methanoregula
Archaea; Euryarchaeota; Methanomicrobia; Methanomicrobiales; Methanoregulaceae; Methanoregula
Archaea; Euryarchaeota; Methanomicrobia; Methanomicrobiales; Methanoregulaceae; Methanoregula
Archaea; Euryarchaeota; Methanomicrobia; Methanomicrobiales; Methanoregulaceae; Methanoregula
Archaea; Euryarchaeota; Methanomicrobia; Methanomicrobiales; Methanoregulaceae; Methanoregula
Archaea; Euryarchaeota; Methanomicrobia; Methanomicrobiales; Methanoregulaceae; Methanoregula
Archaea; Euryarchaeota; Methanomicrobia; Methanomicrobiales; Methanoregulaceae; Methanoregula
Archaea; Euryarchaeota; Methanomicrobia; Methanomicrobiales; Methanoregulaceae; Methanoregula
Archaea; Euryarchaeota; Methanomicrobia; Methanomicrobiales; Methanoregulaceae; Methanoregula
Archaea; Euryarchaeota; Methanomicrobia; Methanomicrobiales; Methanoregulaceae; Methanoregula
Archaea; Euryarchaeota; Methanomicrobia; Methanomicrobiales; Methanoregulaceae; Methanoregula
Archaea; Euryarchaeota; Methanomicrobia; Methanomicrobiales; Methanoregulaceae; Methanoregula
Archaea; Euryarchaeota; Methanomicrobia; Methanomicrobiales; Methanoregulaceae; Methanoregula
Archaea; Euryarchaeota; Methanomicrobia; Methanomicrobiales; Methanoregulaceae; Methanoregula
Archaea; Euryarchaeota; Methanomicrobia; Methanomicrobiales; Methanoregulaceae; Methanoregula
Archaea; Euryarchaeota; Methanomicrobia; Methanomicrobiales; Methanoregulaceae; Methanoregula
Archaea; Euryarchaeota; Methanomicrobia; Methanomicrobiales; Methanoregulaceae; Methanoregula
Archaea; Euryarchaeota; Methanomicrobia; Methanomicrobiales; Methanoregulaceae; Methanoregula
Archaea; Euryarchaeota; Methanomicrobia; Methanomicrobiales; Methanoregulaceae; Methanoregula
Archaea; Euryarchaeota; Methanomicrobia; Methanomicrobiales; Methanoregulaceae; Methanoregula
Archaea; Euryarchaeota; Methanomicrobia; Methanomicrobiales; Methanoregulaceae; Methanoregula
Archaea; Euryarchaeota; Methanomicrobia; Methanomicrobiales; Methanoregulaceae; Methanoregula
Archaea; Euryarchaeota; Methanomicrobia; Methanomicrobiales; Methanoregulaceae; Methanoregula
Archaea; Euryarchaeota; Methanomicrobia; Methanomicrobiales; Methanoregulaceae; Methanoregula
Archaea; Euryarchaeota; Methanomicrobia; Methanomicrobiales; Methanoregulaceae; Methanoregula
Archaea; Euryarchaeota; Methanomicrobia; Methanomicrobiales; Methanoregulaceae; Methanoregula
Archaea; Euryarchaeota; Methanomicrobia; Methanomicrobiales; Methanoregulaceae; Methanoregula
Archaea; Euryarchaeota; Methanomicrobia; Methanomicrobiales; Methanoregulaceae; Methanoregula
Archaea; Euryarchaeota; Methanomicrobia; Methanomicrobiales; Methanoregulaceae; Methanoregula
Archaea; Euryarchaeota; Methanomicrobia; Methanomicrobiales; Methanoregulaceae; Methanoregula
Archaea; Euryarchaeota; Methanomicrobia; Methanomicrobiales; Methanoregulaceae; Methanoregula
Archaea; Euryarchaeota; Methanomicrobia; Methanomicrobiales; Methanoregulaceae; Methanoregula
Archaea; Euryarchaeota; Methanomicrobia; Methanomicrobiales; Methanoregulaceae; Methanoregula
Archaea; Euryarchaeota; Methanomicrobia; Methanomicrobiales; Methanoregulaceae; Methanoregula
Archaea; Euryarchaeota; Methanomicrobia; Methanomicrobiales; Methanoregulaceae; Methanoregula
Archaea; Euryarchaeota; Methanomicrobia; Methanomicrobiales; Methanoregulaceae; Methanoregula
Archaea; Euryarchaeota; Methanomicrobia; Methanomicrobiales; Methanoregulaceae; Methanoregula
Archaea; Euryarchaeota; Methanomicrobia; Methanomicrobiales; Methanoregulaceae; Methanoregula
Archaea; Euryarchaeota; Methanomicrobia; Methanomicrobiales; Methanoregulaceae; Methanoregula
Archaea; Euryarchaeota; Methanomicrobia; Methanomicrobiales; Methanoregulaceae; Methanoregula
Archaea; Euryarchaeota; Methanomicrobia; Methanomicrobiales; Methanoregulaceae; Methanoregula
Archaea; Euryarchaeota; Methanomicrobia; Methanomicrobiales; Methanoregulaceae; Methanoregula
Archaea; Euryarchaeota; Methanomicrobia; Methanomicrobiales; Methanoregulaceae; Methanoregula
Archaea; Euryarchaeota; Methanomicrobia; Methanomicrobiales; Methanoregulaceae; Methanoregula
Archaea; Euryarchaeota; Methanomicrobia; Methanomicrobiales; Methanoregulaceae; Methanoregula
Archaea; Euryarchaeota; Methanomicrobia; Methanomicrobiales; Methanoregulaceae; Methanoregula
Archaea; Euryarchaeota; Methanomicrobia; Methanomicrobiales; Methanoregulaceae; Methanoregula
Archaea; Euryarchaeota; Methanomicrobia; Methanomicrobiales; Methanoregulaceae; Methanoregula
Archaea; Euryarchaeota; Methanomicrobia; Methanomicrobiales; Methanoregulaceae; Methanoregula
Archaea; Euryarchaeota; Methanomicrobia; Methanomicrobiales; Methanoregulaceae; Methanoregula
Archaea; Euryarchaeota; Methanomicrobia; Methanomicrobiales; Methanoregulaceae; Methanoregula
Archaea; Euryarchaeota; Methanomicrobia; Methanomicrobiales; Methanoregulaceae; Methanoregula
Archaea; Euryarchaeota; Methanomicrobia; Methanomicrobiales; Methanoregulaceae; Methanoregula
Archaea; Euryarchaeota; Methanomicrobia; Methanomicrobiales; Methanoregulaceae; Methanoregula
Archaea; Euryarchaeota; Methanomicrobia; Methanomicrobiales; Methanoregulaceae; Methanoregula
Archaea; Euryarchaeota; Methanomicrobia; Methanomicrobiales; Methanoregulaceae; Methanoregula
Archaea; Euryarchaeota; Methanomicrobia; Methanomicrobiales; Methanoregulaceae; Methanoregula
Archaea; Euryarchaeota; Methanomicrobia; Methanomicrobiales; Methanoregulaceae; Methanoregula
Archaea; Euryarchaeota; Methanomicrobia; Methanomicrobiales; Methanoregulaceae; Methanoregula
Archaea; Euryarchaeota; Methanomicrobia; Methanomicrobiales; Methanoregulaceae; Methanoregula
Archaea; Euryarchaeota; Methanomicrobia; Methanomicrobiales; Methanoregulaceae; Methanoregula
Archaea; Euryarchaeota; Methanomicrobia; Methanomicrobiales; Methanoregulaceae; Methanoregula
Archaea; Euryarchaeota; Methanomicrobia; Methanomicrobiales; Methanoregulaceae; Methanoregula
Archaea; Euryarchaeota; Methanomicrobia; Methanomicrobiales; Methanoregulaceae; Methanoregula
Archaea; Euryarchaeota; Methanomicrobia; Methanomicrobiales; Methanoregulaceae; Methanoregula
Archaea; Euryarchaeota; Methanomicrobia; Methanomicrobiales; Methanoregulaceae; Methanoregula
Archaea; Euryarchaeota; Methanomicrobia; Methanomicrobiales; Methanoregulaceae; Methanoregula
Archaea; Euryarchaeota; Methanomicrobia; Methanomicrobiales; Methanoregulaceae; Methanoregula
Archaea; Euryarchaeota; Methanomicrobia; Methanomicrobiales; Methanoregulaceae; Methanoregula
Archaea; Euryarchaeota; Methanomicrobia; Methanomicrobiales; Methanoregulaceae; Methanoregula
Archaea; Euryarchaeota; Methanomicrobia; Methanomicrobiales; Methanoregulaceae; Methanoregula
Archaea; Euryarchaeota; Methanomicrobia; Methanomicrobiales; Methanoregulaceae; Methanoregula
Archaea; Euryarchaeota; Methanomicrobia; Methanomicrobiales; Methanoregulaceae; Methanoregula
Archaea; Euryarchaeota; Methanomicrobia; Methanomicrobiales; Methanoregulaceae; Methanoregula
Archaea; Euryarchaeota; Methanomicrobia; Methanomicrobiales; Methanoregulaceae; Methanoregula
Archaea; Euryarchaeota; Methanomicrobia; Methanomicrobiales; Methanoregulaceae; Methanoregula
Archaea; Euryarchaeota; Methanomicrobia; Methanomicrobiales; Methanoregulaceae; Methanoregula
Archaea; Euryarchaeota; Methanomicrobia; Methanomicrobiales; Methanoregulaceae; Methanoregula
Archaea; Euryarchaeota; Methanomicrobia; Methanomicrobiales; Methanoregulaceae; Methanoregula
Archaea; Euryarchaeota; Methanomicrobia; Methanomicrobiales; Methanoregulaceae; Methanoregula
Archaea; Euryarchaeota; Methanomicrobia; Methanomicrobiales; Methanoregulaceae; Methanoregula
Archaea; Euryarchaeota; Methanomicrobia; Methanomicrobiales; Methanoregulaceae; Methanoregula
Archaea; Euryarchaeota; Methanomicrobia; Methanomicrobiales; Methanoregulaceae; Methanoregula
Archaea; Euryarchaeota; Methanomicrobia; Methanomicrobiales; Methanoregulaceae; Methanoregula
Archaea; Euryarchaeota; Methanomicrobia; Methanomicrobiales; Methanoregulaceae; Methanoregula
Archaea; Euryarchaeota; Methanomicrobia; Methanomicrobiales; Methanoregulaceae; Methanoregula
Archaea; Euryarchaeota; Methanomicrobia; Methanomicrobiales; Methanoregulaceae; Methanoregula
Archaea; Euryarchaeota; Methanomicrobia; Methanomicrobiales; Methanoregulaceae; Methanoregula
Archaea; Euryarchaeota; Methanomicrobia; Methanomicrobiales; Methanoregulaceae; Methanoregula
Archaea; Euryarchaeota; Methanomicrobia; Methanomicrobiales; Methanoregulaceae; Methanoregula
Archaea; Euryarchaeota; Methanomicrobia; Methanomicrobiales; Methanoregulaceae; Methanoregula
Archaea; Euryarchaeota; Methanomicrobia; Methanomicrobiales; Methanoregulaceae; Methanoregula
Archaea; Euryarchaeota; Methanomicrobia; Methanomicrobiales; Methanoregulaceae; Methanoregula
Archaea; Euryarchaeota; Methanomicrobia; Methanomicrobiales; Methanoregulaceae; Methanoregulaceae_unclassified
Archaea; Euryarchaeota; Methanomicrobia; Methanomicrobiales; Methanoregulaceae; Methanosphaerula
Archaea; Euryarchaeota; Methanomicrobia; Methanomicrobiales; Methanoregulaceae; Methanosphaerula
Archaea; Euryarchaeota; Methanomicrobia; Methanomicrobiales; Methanoregulaceae; Methanosphaerula
Archaea; Euryarchaeota; Methanomicrobia; Methanomicrobiales; Methanoregulaceae; Methanosphaerula
Archaea; Euryarchaeota; Methanomicrobia; Methanomicrobiales; Methanoregulaceae; Methanosphaerula
Archaea; Euryarchaeota; Methanomicrobia; Methanomicrobiales; Methanoregulaceae; Methanosphaerula
Archaea; Euryarchaeota; Methanomicrobia; Methanomicrobiales; Methanoregulaceae; Methanosphaerula
Archaea; Euryarchaeota; Methanomicrobia; Methanomicrobiales; Methanoregulaceae; Methanosphaerula
Archaea; Euryarchaeota; Methanomicrobia; Methanomicrobiales; Methanoregulaceae; Methanosphaerula
Archaea; Euryarchaeota; Methanomicrobia; Methanomicrobiales; Methanoregulaceae; Methanosphaerula
Archaea; Euryarchaeota; Methanomicrobia; Methanomicrobiales; Methanoregulaceae; Methanosphaerula
Archaea; Euryarchaeota; Methanomicrobia; Methanomicrobiales; Methanoregulaceae; Methanosphaerula
Archaea; Euryarchaeota; Methanomicrobia; Methanomicrobiales; Methanoregulaceae; Methanosphaerula
Archaea; Euryarchaeota; Methanomicrobia; Methanomicrobiales; Methanoregulaceae; Methanosphaerula
Archaea; Euryarchaeota; Methanomicrobia; Methanomicrobiales; Methanoregulaceae; Methanosphaerula
Archaea; Euryarchaeota; Methanomicrobia; Methanomicrobiales; Methanoregulaceae; Methanosphaerula
Archaea; Euryarchaeota; Methanomicrobia; Methanomicrobiales; Methanoregulaceae; Methanosphaerula
Archaea; Euryarchaeota; Methanomicrobia; Methanomicrobiales; Methanoregulaceae; Methanosphaerula
Archaea; Euryarchaeota; Methanomicrobia; Methanomicrobiales; Methanoregulaceae; Methanosphaerula
Archaea; Euryarchaeota; Methanomicrobia; Methanomicrobiales; Methanoregulaceae; Methanosphaerula
Archaea; Euryarchaeota; Methanomicrobia; Methanomicrobiales; Methanoregulaceae; Methanosphaerula
Archaea; Euryarchaeota; Methanomicrobia; Methanomicrobiales; Methanoregulaceae; Methanosphaerula
Archaea; Euryarchaeota; Methanomicrobia; Methanomicrobiales; Methanoregulaceae; Methanosphaerula
Archaea; Euryarchaeota; Methanomicrobia; Methanomicrobiales; Methanoregulaceae; Methanosphaerula
Archaea; Euryarchaeota; Methanomicrobia; Methanomicrobiales; Methanoregulaceae; Methanosphaerula
Archaea; Euryarchaeota; Methanomicrobia; Methanomicrobiales; Methanoregulaceae; Methanosphaerula
Archaea; Euryarchaeota; Methanomicrobia; Methanomicrobiales; Methanoregulaceae; Methanosphaerula
Archaea; Euryarchaeota; Methanomicrobia; Methanomicrobiales; Methanoregulaceae; Methanosphaerula
Archaea; Euryarchaeota; Methanomicrobia; Methanomicrobiales; Methanoregulaceae; Methanosphaerula
Archaea; Euryarchaeota; Methanomicrobia; Methanomicrobiales; Methanoregulaceae; Methanosphaerula
Archaea; Euryarchaeota; Methanomicrobia; Methanomicrobiales; Methanoregulaceae; Methanosphaerula
Archaea; Euryarchaeota; Methanomicrobia; Methanomicrobiales; Methanoregulaceae; Methanosphaerula
Archaea; Euryarchaeota; Methanomicrobia; Methanomicrobiales; Methanoregulaceae; Methanosphaerula
Archaea; Euryarchaeota; Methanomicrobia; Methanomicrobiales; Methanoregulaceae; Methanosphaerula
Archaea; Euryarchaeota; Methanomicrobia; Methanomicrobiales; Methanoregulaceae; Methanosphaerula
Archaea; Euryarchaeota; Methanomicrobia; Methanomicrobiales; Methanoregulaceae; Methanosphaerula
Archaea; Euryarchaeota; Methanomicrobia; Methanomicrobiales; Methanoregulaceae; Methanosphaerula
Archaea; Euryarchaeota; Methanomicrobia; Methanomicrobiales; Methanoregulaceae; Methanosphaerula
Archaea; Euryarchaeota; Methanomicrobia; Methanomicrobiales; Methanoregulaceae; Methanosphaerula
Archaea; Euryarchaeota; Methanomicrobia; Methanomicrobiales; Methanoregulaceae; Methanosphaerula
Archaea; Euryarchaeota; Methanomicrobia; Methanomicrobiales; Methanoregulaceae; Methanosphaerula
Archaea; Euryarchaeota; Methanomicrobia; Methanomicrobiales; Methanoregulaceae; Methanosphaerula
Archaea; Euryarchaeota; Methanomicrobia; Methanomicrobiales; Methanoregulaceae; Methanosphaerula
Archaea; Euryarchaeota; Methanomicrobia; Methanomicrobiales; Methanoregulaceae; Methanosphaerula
Archaea; Euryarchaeota; Methanomicrobia; Methanomicrobiales; Methanoregulaceae; Methanosphaerula
Archaea; Euryarchaeota; Methanomicrobia; Methanomicrobiales; Methanoregulaceae; Methanosphaerula
Archaea; Euryarchaeota; Methanomicrobia; Methanomicrobiales; Methanoregulaceae; Methanosphaerula
Archaea; Euryarchaeota; Methanomicrobia; Methanomicrobiales; Methanoregulaceae; Methanosphaerula
Archaea; Euryarchaeota; Methanomicrobia; Methanomicrobiales; Methanoregulaceae; Methanosphaerula
Archaea; Euryarchaeota; Methanomicrobia; Methanomicrobiales; Methanoregulaceae; Methanosphaerula
Archaea; Euryarchaeota; Methanomicrobia; Methanomicrobiales; Methanoregulaceae; Methanosphaerula
Archaea; Euryarchaeota; Methanomicrobia; Methanomicrobiales; Methanoregulaceae; Methanosphaerula
Archaea; Euryarchaeota; Methanomicrobia; Methanomicrobiales; Methanoregulaceae; Methanosphaerula
Archaea; Euryarchaeota; Methanomicrobia; Methanomicrobiales; Methanoregulaceae; Methanosphaerula
Archaea; Euryarchaeota; Methanomicrobia; Methanomicrobiales; Methanoregulaceae; Methanosphaerula
Archaea; Euryarchaeota; Methanomicrobia; Methanomicrobiales; Methanoregulaceae; Methanosphaerula
Archaea; Euryarchaeota; Methanomicrobia; Methanomicrobiales; Methanoregulaceae; Methanosphaerula
Archaea; Euryarchaeota; Methanomicrobia; Methanomicrobiales; Methanoregulaceae; Methanosphaerula
Archaea; Euryarchaeota; Methanomicrobia; Methanomicrobiales; Methanoregulaceae; Methanosphaerula
Archaea; Euryarchaeota; Methanomicrobia; Methanomicrobiales; Methanoregulaceae; Methanosphaerula
Archaea; Euryarchaeota; Methanomicrobia; Methanomicrobiales; Methanoregulaceae; Methanosphaerula
Archaea; Euryarchaeota; Methanomicrobia; Methanomicrobiales; Methanoregulaceae; Methanosphaerula
Archaea; Euryarchaeota; Methanomicrobia; Methanomicrobiales; Methanoregulaceae; Methanosphaerula
Archaea; Euryarchaeota; Methanomicrobia; Methanomicrobiales; Methanoregulaceae; Methanosphaerula
Archaea; Euryarchaeota; Methanomicrobia; Methanomicrobiales; Methanoregulaceae; Methanosphaerula
Archaea; Euryarchaeota; Methanomicrobia; Methanomicrobiales; Methanoregulaceae; Methanosphaerula
Archaea; Euryarchaeota; Methanomicrobia; Methanomicrobiales; Methanospirillaceae; Methanospirillum
Archaea; Euryarchaeota; Methanomicrobia; Methanomicrobiales; Methanospirillaceae; Methanospirillum
Archaea; Euryarchaeota; Methanomicrobia; Methanomicrobiales; Methanospirillaceae; Methanospirillum
Archaea; Euryarchaeota; Methanomicrobia; Methanomicrobiales; Rice_Cluster_II; Rice_Cluster_II_ge
Archaea; Euryarchaeota; Methanomicrobia; Methanomicrobiales; Rice_Cluster_II; Rice_Cluster_II_ge
Archaea; Euryarchaeota; Methanomicrobia; Methanomicrobiales; Rice_Cluster_II; Rice_Cluster_II_ge
Archaea; Euryarchaeota; Methanomicrobia; Methanomicrobiales; Rice_Cluster_II; Rice_Cluster_II_ge
Archaea; Euryarchaeota; Methanomicrobia; Methanomicrobiales; Rice_Cluster_II; Rice_Cluster_II_ge
Archaea; Euryarchaeota; Methanomicrobia; Methanomicrobiales; Rice_Cluster_II; Rice_Cluster_II_ge
Archaea; Euryarchaeota; Methanomicrobia; Methanomicrobiales; Rice_Cluster_II; Rice_Cluster_II_ge
Archaea; Euryarchaeota; Methanomicrobia; Methanomicrobiales; Rice_Cluster_II; Rice_Cluster_II_ge
Archaea; Euryarchaeota; Methanomicrobia; Methanomicrobiales; Rice_Cluster_II; Rice_Cluster_II_ge
Archaea; Euryarchaeota; Methanomicrobia; Methanomicrobiales; Rice_Cluster_II; Rice_Cluster_II_ge
Archaea; Euryarchaeota; Methanomicrobia; Methanomicrobiales; Rice_Cluster_II; Rice_Cluster_II_ge
Archaea; Euryarchaeota; Methanomicrobia; Methanomicrobiales; Rice_Cluster_II; Rice_Cluster_II_ge
Archaea; Euryarchaeota; Methanomicrobia; Methanomicrobiales; Rice_Cluster_II; Rice_Cluster_II_ge
Archaea; Euryarchaeota; Methanomicrobia; Methanomicrobiales; Rice_Cluster_II; Rice_Cluster_II_ge
Archaea; Euryarchaeota; Methanomicrobia; Methanomicrobiales; Rice_Cluster_II; Rice_Cluster_II_ge
Archaea; Euryarchaeota; Methanomicrobia; Methanomicrobiales; Rice_Cluster_II; Rice_Cluster_II_ge
Archaea; Euryarchaeota; Methanomicrobia; Methanomicrobiales; Rice_Cluster_II; Rice_Cluster_II_ge
Archaea; Euryarchaeota; Methanomicrobia; Methanomicrobiales; Rice_Cluster_II; Rice_Cluster_II_ge
Archaea; Euryarchaeota; Methanomicrobia; Methanomicrobiales; Rice_Cluster_II; Rice_Cluster_II_ge
Archaea; Euryarchaeota; Methanomicrobia; Methanomicrobiales; Rice_Cluster_II; Rice_Cluster_II_ge
Archaea; Euryarchaeota; Methanomicrobia; Methanomicrobiales; Rice_Cluster_II; Rice_Cluster_II_ge
Archaea; Euryarchaeota; Methanomicrobia; Methanomicrobiales; Rice_Cluster_II; Rice_Cluster_II_ge
Archaea; Euryarchaeota; Methanomicrobia; Methanomicrobiales; Rice_Cluster_II; Rice_Cluster_II_ge
Archaea; Euryarchaeota; Methanomicrobia; Methanomicrobiales; Rice_Cluster_II; Rice_Cluster_II_ge
Archaea; Euryarchaeota; Methanomicrobia; Methanosarcinales; Methanosarcinaceae; Methanosarcina
Archaea; Euryarchaeota; Methanomicrobia; Methanosarcinales; Methanosarcinaceae; Methanosarcina
Archaea; Euryarchaeota; Methanomicrobia; Methanosarcinales; Methanosarcinaceae; Methanosarcina
Archaea; Euryarchaeota; Methanomicrobia; Methanosarcinales; Methanosarcinaceae; Methanosarcina
Archaea; Euryarchaeota; Methanomicrobia; Methanosarcinales; Methanosarcinaceae; Methanosarcina
# methanogenesis (472 records):
Archaea; Euryarchaeota; Methanobacteria; Methanobacteriales; Methanobacteriaceae; Methanobacterium
Archaea; Euryarchaeota; Methanobacteria; Methanobacteriales; Methanobacteriaceae; Methanobacterium
Archaea; Euryarchaeota; Methanobacteria; Methanobacteriales; Methanobacteriaceae; Methanobacterium
Archaea; Euryarchaeota; Methanobacteria; Methanobacteriales; Methanobacteriaceae; Methanobacterium
Archaea; Euryarchaeota; Methanobacteria; Methanobacteriales; Methanobacteriaceae; Methanobacterium
Archaea; Euryarchaeota; Methanobacteria; Methanobacteriales; Methanobacteriaceae; Methanobacterium
Archaea; Euryarchaeota; Methanobacteria; Methanobacteriales; Methanobacteriaceae; Methanobacterium
Archaea; Euryarchaeota; Methanobacteria; Methanobacteriales; Methanobacteriaceae; Methanobacterium
Archaea; Euryarchaeota; Methanobacteria; Methanobacteriales; Methanobacteriaceae; Methanobacterium
Archaea; Euryarchaeota; Methanobacteria; Methanobacteriales; Methanobacteriaceae; Methanobacterium
Archaea; Euryarchaeota; Methanomicrobia; Methanocellales; Methanocellaceae; Methanocella
Archaea; Euryarchaeota; Methanomicrobia; Methanomicrobiales; Methanomicrobiales_unclassified; Methanomicrobiales_unclassified
Archaea; Euryarchaeota; Methanomicrobia; Methanomicrobiales; Methanomicrobiales_unclassified; Methanomicrobiales_unclassified
Archaea; Euryarchaeota; Methanomicrobia; Methanomicrobiales; Methanomicrobiales_unclassified; Methanomicrobiales_unclassified
Archaea; Euryarchaeota; Methanomicrobia; Methanomicrobiales; Methanomicrobiales_unclassified; Methanomicrobiales_unclassified
Archaea; Euryarchaeota; Methanomicrobia; Methanomicrobiales; Methanomicrobiales_unclassified; Methanomicrobiales_unclassified
Archaea; Euryarchaeota; Methanomicrobia; Methanomicrobiales; Methanomicrobiales_unclassified; Methanomicrobiales_unclassified
Archaea; Euryarchaeota; Methanomicrobia; Methanomicrobiales; Methanoregulaceae; Methanolinea
Archaea; Euryarchaeota; Methanomicrobia; Methanomicrobiales; Methanoregulaceae; Methanolinea
Archaea; Euryarchaeota; Methanomicrobia; Methanomicrobiales; Methanoregulaceae; Methanoregula
Archaea; Euryarchaeota; Methanomicrobia; Methanomicrobiales; Methanoregulaceae; Methanoregula
Archaea; Euryarchaeota; Methanomicrobia; Methanomicrobiales; Methanoregulaceae; Methanoregula
Archaea; Euryarchaeota; Methanomicrobia; Methanomicrobiales; Methanoregulaceae; Methanoregula
Archaea; Euryarchaeota; Methanomicrobia; Methanomicrobiales; Methanoregulaceae; Methanoregula
Archaea; Euryarchaeota; Methanomicrobia; Methanomicrobiales; Methanoregulaceae; Methanoregula
Archaea; Euryarchaeota; Methanomicrobia; Methanomicrobiales; Methanoregulaceae; Methanoregula
Archaea; Euryarchaeota; Methanomicrobia; Methanomicrobiales; Methanoregulaceae; Methanoregula
Archaea; Euryarchaeota; Methanomicrobia; Methanomicrobiales; Methanoregulaceae; Methanoregula
Archaea; Euryarchaeota; Methanomicrobia; Methanomicrobiales; Methanoregulaceae; Methanoregula
Archaea; Euryarchaeota; Methanomicrobia; Methanomicrobiales; Methanoregulaceae; Methanoregula
Archaea; Euryarchaeota; Methanomicrobia; Methanomicrobiales; Methanoregulaceae; Methanoregula
Archaea; Euryarchaeota; Methanomicrobia; Methanomicrobiales; Methanoregulaceae; Methanoregula
Archaea; Euryarchaeota; Methanomicrobia; Methanomicrobiales; Methanoregulaceae; Methanoregula
Archaea; Euryarchaeota; Methanomicrobia; Methanomicrobiales; Methanoregulaceae; Methanoregula
Archaea; Euryarchaeota; Methanomicrobia; Methanomicrobiales; Methanoregulaceae; Methanoregula
Archaea; Euryarchaeota; Methanomicrobia; Methanomicrobiales; Methanoregulaceae; Methanoregula
Archaea; Euryarchaeota; Methanomicrobia; Methanomicrobiales; Methanoregulaceae; Methanoregula
Archaea; Euryarchaeota; Methanomicrobia; Methanomicrobiales; Methanoregulaceae; Methanoregula
Archaea; Euryarchaeota; Methanomicrobia; Methanomicrobiales; Methanoregulaceae; Methanoregula
Archaea; Euryarchaeota; Methanomicrobia; Methanomicrobiales; Methanoregulaceae; Methanoregula
Archaea; Euryarchaeota; Methanomicrobia; Methanomicrobiales; Methanoregulaceae; Methanoregula
Archaea; Euryarchaeota; Methanomicrobia; Methanomicrobiales; Methanoregulaceae; Methanoregula
Archaea; Euryarchaeota; Methanomicrobia; Methanomicrobiales; Methanoregulaceae; Methanoregula
Archaea; Euryarchaeota; Methanomicrobia; Methanomicrobiales; Methanoregulaceae; Methanoregula
Archaea; Euryarchaeota; Methanomicrobia; Methanomicrobiales; Methanoregulaceae; Methanoregula
Archaea; Euryarchaeota; Methanomicrobia; Methanomicrobiales; Methanoregulaceae; Methanoregula
Archaea; Euryarchaeota; Methanomicrobia; Methanomicrobiales; Methanoregulaceae; Methanoregula
Archaea; Euryarchaeota; Methanomicrobia; Methanomicrobiales; Methanoregulaceae; Methanoregula
Archaea; Euryarchaeota; Methanomicrobia; Methanomicrobiales; Methanoregulaceae; Methanoregula
Archaea; Euryarchaeota; Methanomicrobia; Methanomicrobiales; Methanoregulaceae; Methanoregula
Archaea; Euryarchaeota; Methanomicrobia; Methanomicrobiales; Methanoregulaceae; Methanoregula
Archaea; Euryarchaeota; Methanomicrobia; Methanomicrobiales; Methanoregulaceae; Methanoregula
Archaea; Euryarchaeota; Methanomicrobia; Methanomicrobiales; Methanoregulaceae; Methanoregula
Archaea; Euryarchaeota; Methanomicrobia; Methanomicrobiales; Methanoregulaceae; Methanoregula
Archaea; Euryarchaeota; Methanomicrobia; Methanomicrobiales; Methanoregulaceae; Methanoregula
Archaea; Euryarchaeota; Methanomicrobia; Methanomicrobiales; Methanoregulaceae; Methanoregula
Archaea; Euryarchaeota; Methanomicrobia; Methanomicrobiales; Methanoregulaceae; Methanoregula
Archaea; Euryarchaeota; Methanomicrobia; Methanomicrobiales; Methanoregulaceae; Methanoregula
Archaea; Euryarchaeota; Methanomicrobia; Methanomicrobiales; Methanoregulaceae; Methanoregula
Archaea; Euryarchaeota; Methanomicrobia; Methanomicrobiales; Methanoregulaceae; Methanoregula
Archaea; Euryarchaeota; Methanomicrobia; Methanomicrobiales; Methanoregulaceae; Methanoregula
Archaea; Euryarchaeota; Methanomicrobia; Methanomicrobiales; Methanoregulaceae; Methanoregula
Archaea; Euryarchaeota; Methanomicrobia; Methanomicrobiales; Methanoregulaceae; Methanoregula
Archaea; Euryarchaeota; Methanomicrobia; Methanomicrobiales; Methanoregulaceae; Methanoregula
Archaea; Euryarchaeota; Methanomicrobia; Methanomicrobiales; Methanoregulaceae; Methanoregula
Archaea; Euryarchaeota; Methanomicrobia; Methanomicrobiales; Methanoregulaceae; Methanoregula
Archaea; Euryarchaeota; Methanomicrobia; Methanomicrobiales; Methanoregulaceae; Methanoregula
Archaea; Euryarchaeota; Methanomicrobia; Methanomicrobiales; Methanoregulaceae; Methanoregula
Archaea; Euryarchaeota; Methanomicrobia; Methanomicrobiales; Methanoregulaceae; Methanoregula
Archaea; Euryarchaeota; Methanomicrobia; Methanomicrobiales; Methanoregulaceae; Methanoregula
Archaea; Euryarchaeota; Methanomicrobia; Methanomicrobiales; Methanoregulaceae; Methanoregula
Archaea; Euryarchaeota; Methanomicrobia; Methanomicrobiales; Methanoregulaceae; Methanoregula
Archaea; Euryarchaeota; Methanomicrobia; Methanomicrobiales; Methanoregulaceae; Methanoregula
Archaea; Euryarchaeota; Methanomicrobia; Methanomicrobiales; Methanoregulaceae; Methanoregula
Archaea; Euryarchaeota; Methanomicrobia; Methanomicrobiales; Methanoregulaceae; Methanoregula
Archaea; Euryarchaeota; Methanomicrobia; Methanomicrobiales; Methanoregulaceae; Methanoregula
Archaea; Euryarchaeota; Methanomicrobia; Methanomicrobiales; Methanoregulaceae; Methanoregula
Archaea; Euryarchaeota; Methanomicrobia; Methanomicrobiales; Methanoregulaceae; Methanoregula
Archaea; Euryarchaeota; Methanomicrobia; Methanomicrobiales; Methanoregulaceae; Methanoregula
Archaea; Euryarchaeota; Methanomicrobia; Methanomicrobiales; Methanoregulaceae; Methanoregula
Archaea; Euryarchaeota; Methanomicrobia; Methanomicrobiales; Methanoregulaceae; Methanoregula
Archaea; Euryarchaeota; Methanomicrobia; Methanomicrobiales; Methanoregulaceae; Methanoregula
Archaea; Euryarchaeota; Methanomicrobia; Methanomicrobiales; Methanoregulaceae; Methanoregula
Archaea; Euryarchaeota; Methanomicrobia; Methanomicrobiales; Methanoregulaceae; Methanoregula
Archaea; Euryarchaeota; Methanomicrobia; Methanomicrobiales; Methanoregulaceae; Methanoregula
Archaea; Euryarchaeota; Methanomicrobia; Methanomicrobiales; Methanoregulaceae; Methanoregula
Archaea; Euryarchaeota; Methanomicrobia; Methanomicrobiales; Methanoregulaceae; Methanoregula
Archaea; Euryarchaeota; Methanomicrobia; Methanomicrobiales; Methanoregulaceae; Methanoregula
Archaea; Euryarchaeota; Methanomicrobia; Methanomicrobiales; Methanoregulaceae; Methanoregula
Archaea; Euryarchaeota; Methanomicrobia; Methanomicrobiales; Methanoregulaceae; Methanoregula
Archaea; Euryarchaeota; Methanomicrobia; Methanomicrobiales; Methanoregulaceae; Methanoregula
Archaea; Euryarchaeota; Methanomicrobia; Methanomicrobiales; Methanoregulaceae; Methanoregula
Archaea; Euryarchaeota; Methanomicrobia; Methanomicrobiales; Methanoregulaceae; Methanoregula
Archaea; Euryarchaeota; Methanomicrobia; Methanomicrobiales; Methanoregulaceae; Methanoregula
Archaea; Euryarchaeota; Methanomicrobia; Methanomicrobiales; Methanoregulaceae; Methanoregula
Archaea; Euryarchaeota; Methanomicrobia; Methanomicrobiales; Methanoregulaceae; Methanoregula
Archaea; Euryarchaeota; Methanomicrobia; Methanomicrobiales; Methanoregulaceae; Methanoregula
Archaea; Euryarchaeota; Methanomicrobia; Methanomicrobiales; Methanoregulaceae; Methanoregula
Archaea; Euryarchaeota; Methanomicrobia; Methanomicrobiales; Methanoregulaceae; Methanoregula
Archaea; Euryarchaeota; Methanomicrobia; Methanomicrobiales; Methanoregulaceae; Methanoregula
Archaea; Euryarchaeota; Methanomicrobia; Methanomicrobiales; Methanoregulaceae; Methanoregula
Archaea; Euryarchaeota; Methanomicrobia; Methanomicrobiales; Methanoregulaceae; Methanoregula
Archaea; Euryarchaeota; Methanomicrobia; Methanomicrobiales; Methanoregulaceae; Methanoregula
Archaea; Euryarchaeota; Methanomicrobia; Methanomicrobiales; Methanoregulaceae; Methanoregula
Archaea; Euryarchaeota; Methanomicrobia; Methanomicrobiales; Methanoregulaceae; Methanoregula
Archaea; Euryarchaeota; Methanomicrobia; Methanomicrobiales; Methanoregulaceae; Methanoregula
Archaea; Euryarchaeota; Methanomicrobia; Methanomicrobiales; Methanoregulaceae; Methanoregula
Archaea; Euryarchaeota; Methanomicrobia; Methanomicrobiales; Methanoregulaceae; Methanoregula
Archaea; Euryarchaeota; Methanomicrobia; Methanomicrobiales; Methanoregulaceae; Methanoregula
Archaea; Euryarchaeota; Methanomicrobia; Methanomicrobiales; Methanoregulaceae; Methanoregula
Archaea; Euryarchaeota; Methanomicrobia; Methanomicrobiales; Methanoregulaceae; Methanoregula
Archaea; Euryarchaeota; Methanomicrobia; Methanomicrobiales; Methanoregulaceae; Methanoregula
Archaea; Euryarchaeota; Methanomicrobia; Methanomicrobiales; Methanoregulaceae; Methanoregula
Archaea; Euryarchaeota; Methanomicrobia; Methanomicrobiales; Methanoregulaceae; Methanoregula
Archaea; Euryarchaeota; Methanomicrobia; Methanomicrobiales; Methanoregulaceae; Methanoregula
Archaea; Euryarchaeota; Methanomicrobia; Methanomicrobiales; Methanoregulaceae; Methanoregula
Archaea; Euryarchaeota; Methanomicrobia; Methanomicrobiales; Methanoregulaceae; Methanoregula
Archaea; Euryarchaeota; Methanomicrobia; Methanomicrobiales; Methanoregulaceae; Methanoregula
Archaea; Euryarchaeota; Methanomicrobia; Methanomicrobiales; Methanoregulaceae; Methanoregula
Archaea; Euryarchaeota; Methanomicrobia; Methanomicrobiales; Methanoregulaceae; Methanoregula
Archaea; Euryarchaeota; Methanomicrobia; Methanomicrobiales; Methanoregulaceae; Methanoregula
Archaea; Euryarchaeota; Methanomicrobia; Methanomicrobiales; Methanoregulaceae; Methanoregula
Archaea; Euryarchaeota; Methanomicrobia; Methanomicrobiales; Methanoregulaceae; Methanoregula
Archaea; Euryarchaeota; Methanomicrobia; Methanomicrobiales; Methanoregulaceae; Methanoregula
Archaea; Euryarchaeota; Methanomicrobia; Methanomicrobiales; Methanoregulaceae; Methanoregula
Archaea; Euryarchaeota; Methanomicrobia; Methanomicrobiales; Methanoregulaceae; Methanoregula
Archaea; Euryarchaeota; Methanomicrobia; Methanomicrobiales; Methanoregulaceae; Methanoregula
Archaea; Euryarchaeota; Methanomicrobia; Methanomicrobiales; Methanoregulaceae; Methanoregula
Archaea; Euryarchaeota; Methanomicrobia; Methanomicrobiales; Methanoregulaceae; Methanoregula
Archaea; Euryarchaeota; Methanomicrobia; Methanomicrobiales; Methanoregulaceae; Methanoregula
Archaea; Euryarchaeota; Methanomicrobia; Methanomicrobiales; Methanoregulaceae; Methanoregula
Archaea; Euryarchaeota; Methanomicrobia; Methanomicrobiales; Methanoregulaceae; Methanoregula
Archaea; Euryarchaeota; Methanomicrobia; Methanomicrobiales; Methanoregulaceae; Methanoregula
Archaea; Euryarchaeota; Methanomicrobia; Methanomicrobiales; Methanoregulaceae; Methanoregula
Archaea; Euryarchaeota; Methanomicrobia; Methanomicrobiales; Methanoregulaceae; Methanoregula
Archaea; Euryarchaeota; Methanomicrobia; Methanomicrobiales; Methanoregulaceae; Methanoregula
Archaea; Euryarchaeota; Methanomicrobia; Methanomicrobiales; Methanoregulaceae; Methanoregula
Archaea; Euryarchaeota; Methanomicrobia; Methanomicrobiales; Methanoregulaceae; Methanoregula
Archaea; Euryarchaeota; Methanomicrobia; Methanomicrobiales; Methanoregulaceae; Methanoregula
Archaea; Euryarchaeota; Methanomicrobia; Methanomicrobiales; Methanoregulaceae; Methanoregula
Archaea; Euryarchaeota; Methanomicrobia; Methanomicrobiales; Methanoregulaceae; Methanoregula
Archaea; Euryarchaeota; Methanomicrobia; Methanomicrobiales; Methanoregulaceae; Methanoregula
Archaea; Euryarchaeota; Methanomicrobia; Methanomicrobiales; Methanoregulaceae; Methanoregula
Archaea; Euryarchaeota; Methanomicrobia; Methanomicrobiales; Methanoregulaceae; Methanoregula
Archaea; Euryarchaeota; Methanomicrobia; Methanomicrobiales; Methanoregulaceae; Methanoregula
Archaea; Euryarchaeota; Methanomicrobia; Methanomicrobiales; Methanoregulaceae; Methanoregula
Archaea; Euryarchaeota; Methanomicrobia; Methanomicrobiales; Methanoregulaceae; Methanoregula
Archaea; Euryarchaeota; Methanomicrobia; Methanomicrobiales; Methanoregulaceae; Methanoregula
Archaea; Euryarchaeota; Methanomicrobia; Methanomicrobiales; Methanoregulaceae; Methanoregula
Archaea; Euryarchaeota; Methanomicrobia; Methanomicrobiales; Methanoregulaceae; Methanoregula
Archaea; Euryarchaeota; Methanomicrobia; Methanomicrobiales; Methanoregulaceae; Methanoregula
Archaea; Euryarchaeota; Methanomicrobia; Methanomicrobiales; Methanoregulaceae; Methanoregula
Archaea; Euryarchaeota; Methanomicrobia; Methanomicrobiales; Methanoregulaceae; Methanoregula
Archaea; Euryarchaeota; Methanomicrobia; Methanomicrobiales; Methanoregulaceae; Methanoregula
Archaea; Euryarchaeota; Methanomicrobia; Methanomicrobiales; Methanoregulaceae; Methanoregula
Archaea; Euryarchaeota; Methanomicrobia; Methanomicrobiales; Methanoregulaceae; Methanoregula
Archaea; Euryarchaeota; Methanomicrobia; Methanomicrobiales; Methanoregulaceae; Methanoregula
Archaea; Euryarchaeota; Methanomicrobia; Methanomicrobiales; Methanoregulaceae; Methanoregula
Archaea; Euryarchaeota; Methanomicrobia; Methanomicrobiales; Methanoregulaceae; Methanoregula
Archaea; Euryarchaeota; Methanomicrobia; Methanomicrobiales; Methanoregulaceae; Methanoregula
Archaea; Euryarchaeota; Methanomicrobia; Methanomicrobiales; Methanoregulaceae; Methanoregula
Archaea; Euryarchaeota; Methanomicrobia; Methanomicrobiales; Methanoregulaceae; Methanoregula
Archaea; Euryarchaeota; Methanomicrobia; Methanomicrobiales; Methanoregulaceae; Methanoregula
Archaea; Euryarchaeota; Methanomicrobia; Methanomicrobiales; Methanoregulaceae; Methanoregula
Archaea; Euryarchaeota; Methanomicrobia; Methanomicrobiales; Methanoregulaceae; Methanoregula
Archaea; Euryarchaeota; Methanomicrobia; Methanomicrobiales; Methanoregulaceae; Methanoregula
Archaea; Euryarchaeota; Methanomicrobia; Methanomicrobiales; Methanoregulaceae; Methanoregula
Archaea; Euryarchaeota; Methanomicrobia; Methanomicrobiales; Methanoregulaceae; Methanoregula
Archaea; Euryarchaeota; Methanomicrobia; Methanomicrobiales; Methanoregulaceae; Methanoregula
Archaea; Euryarchaeota; Methanomicrobia; Methanomicrobiales; Methanoregulaceae; Methanoregula
Archaea; Euryarchaeota; Methanomicrobia; Methanomicrobiales; Methanoregulaceae; Methanoregula
Archaea; Euryarchaeota; Methanomicrobia; Methanomicrobiales; Methanoregulaceae; Methanoregula
Archaea; Euryarchaeota; Methanomicrobia; Methanomicrobiales; Methanoregulaceae; Methanoregula
Archaea; Euryarchaeota; Methanomicrobia; Methanomicrobiales; Methanoregulaceae; Methanoregula
Archaea; Euryarchaeota; Methanomicrobia; Methanomicrobiales; Methanoregulaceae; Methanoregula
Archaea; Euryarchaeota; Methanomicrobia; Methanomicrobiales; Methanoregulaceae; Methanoregula
Archaea; Euryarchaeota; Methanomicrobia; Methanomicrobiales; Methanoregulaceae; Methanoregula
Archaea; Euryarchaeota; Methanomicrobia; Methanomicrobiales; Methanoregulaceae; Methanoregula
Archaea; Euryarchaeota; Methanomicrobia; Methanomicrobiales; Methanoregulaceae; Methanoregula
Archaea; Euryarchaeota; Methanomicrobia; Methanomicrobiales; Methanoregulaceae; Methanoregula
Archaea; Euryarchaeota; Methanomicrobia; Methanomicrobiales; Methanoregulaceae; Methanoregula
Archaea; Euryarchaeota; Methanomicrobia; Methanomicrobiales; Methanoregulaceae; Methanoregula
Archaea; Euryarchaeota; Methanomicrobia; Methanomicrobiales; Methanoregulaceae; Methanoregula
Archaea; Euryarchaeota; Methanomicrobia; Methanomicrobiales; Methanoregulaceae; Methanoregula
Archaea; Euryarchaeota; Methanomicrobia; Methanomicrobiales; Methanoregulaceae; Methanoregula
Archaea; Euryarchaeota; Methanomicrobia; Methanomicrobiales; Methanoregulaceae; Methanoregula
Archaea; Euryarchaeota; Methanomicrobia; Methanomicrobiales; Methanoregulaceae; Methanoregula
Archaea; Euryarchaeota; Methanomicrobia; Methanomicrobiales; Methanoregulaceae; Methanoregula
Archaea; Euryarchaeota; Methanomicrobia; Methanomicrobiales; Methanoregulaceae; Methanoregula
Archaea; Euryarchaeota; Methanomicrobia; Methanomicrobiales; Methanoregulaceae; Methanoregula
Archaea; Euryarchaeota; Methanomicrobia; Methanomicrobiales; Methanoregulaceae; Methanoregula
Archaea; Euryarchaeota; Methanomicrobia; Methanomicrobiales; Methanoregulaceae; Methanoregula
Archaea; Euryarchaeota; Methanomicrobia; Methanomicrobiales; Methanoregulaceae; Methanoregula
Archaea; Euryarchaeota; Methanomicrobia; Methanomicrobiales; Methanoregulaceae; Methanoregulaceae_unclassified
Archaea; Euryarchaeota; Methanomicrobia; Methanomicrobiales; Methanoregulaceae; Methanosphaerula
Archaea; Euryarchaeota; Methanomicrobia; Methanomicrobiales; Methanoregulaceae; Methanosphaerula
Archaea; Euryarchaeota; Methanomicrobia; Methanomicrobiales; Methanoregulaceae; Methanosphaerula
Archaea; Euryarchaeota; Methanomicrobia; Methanomicrobiales; Methanoregulaceae; Methanosphaerula
Archaea; Euryarchaeota; Methanomicrobia; Methanomicrobiales; Methanoregulaceae; Methanosphaerula
Archaea; Euryarchaeota; Methanomicrobia; Methanomicrobiales; Methanoregulaceae; Methanosphaerula
Archaea; Euryarchaeota; Methanomicrobia; Methanomicrobiales; Methanoregulaceae; Methanosphaerula
Archaea; Euryarchaeota; Methanomicrobia; Methanomicrobiales; Methanoregulaceae; Methanosphaerula
Archaea; Euryarchaeota; Methanomicrobia; Methanomicrobiales; Methanoregulaceae; Methanosphaerula
Archaea; Euryarchaeota; Methanomicrobia; Methanomicrobiales; Methanoregulaceae; Methanosphaerula
Archaea; Euryarchaeota; Methanomicrobia; Methanomicrobiales; Methanoregulaceae; Methanosphaerula
Archaea; Euryarchaeota; Methanomicrobia; Methanomicrobiales; Methanoregulaceae; Methanosphaerula
Archaea; Euryarchaeota; Methanomicrobia; Methanomicrobiales; Methanoregulaceae; Methanosphaerula
Archaea; Euryarchaeota; Methanomicrobia; Methanomicrobiales; Methanoregulaceae; Methanosphaerula
Archaea; Euryarchaeota; Methanomicrobia; Methanomicrobiales; Methanoregulaceae; Methanosphaerula
Archaea; Euryarchaeota; Methanomicrobia; Methanomicrobiales; Methanoregulaceae; Methanosphaerula
Archaea; Euryarchaeota; Methanomicrobia; Methanomicrobiales; Methanoregulaceae; Methanosphaerula
Archaea; Euryarchaeota; Methanomicrobia; Methanomicrobiales; Methanoregulaceae; Methanosphaerula
Archaea; Euryarchaeota; Methanomicrobia; Methanomicrobiales; Methanoregulaceae; Methanosphaerula
Archaea; Euryarchaeota; Methanomicrobia; Methanomicrobiales; Methanoregulaceae; Methanosphaerula
Archaea; Euryarchaeota; Methanomicrobia; Methanomicrobiales; Methanoregulaceae; Methanosphaerula
Archaea; Euryarchaeota; Methanomicrobia; Methanomicrobiales; Methanoregulaceae; Methanosphaerula
Archaea; Euryarchaeota; Methanomicrobia; Methanomicrobiales; Methanoregulaceae; Methanosphaerula
Archaea; Euryarchaeota; Methanomicrobia; Methanomicrobiales; Methanoregulaceae; Methanosphaerula
Archaea; Euryarchaeota; Methanomicrobia; Methanomicrobiales; Methanoregulaceae; Methanosphaerula
Archaea; Euryarchaeota; Methanomicrobia; Methanomicrobiales; Methanoregulaceae; Methanosphaerula
Archaea; Euryarchaeota; Methanomicrobia; Methanomicrobiales; Methanoregulaceae; Methanosphaerula
Archaea; Euryarchaeota; Methanomicrobia; Methanomicrobiales; Methanoregulaceae; Methanosphaerula
Archaea; Euryarchaeota; Methanomicrobia; Methanomicrobiales; Methanoregulaceae; Methanosphaerula
Archaea; Euryarchaeota; Methanomicrobia; Methanomicrobiales; Methanoregulaceae; Methanosphaerula
Archaea; Euryarchaeota; Methanomicrobia; Methanomicrobiales; Methanoregulaceae; Methanosphaerula
Archaea; Euryarchaeota; Methanomicrobia; Methanomicrobiales; Methanoregulaceae; Methanosphaerula
Archaea; Euryarchaeota; Methanomicrobia; Methanomicrobiales; Methanoregulaceae; Methanosphaerula
Archaea; Euryarchaeota; Methanomicrobia; Methanomicrobiales; Methanoregulaceae; Methanosphaerula
Archaea; Euryarchaeota; Methanomicrobia; Methanomicrobiales; Methanoregulaceae; Methanosphaerula
Archaea; Euryarchaeota; Methanomicrobia; Methanomicrobiales; Methanoregulaceae; Methanosphaerula
Archaea; Euryarchaeota; Methanomicrobia; Methanomicrobiales; Methanoregulaceae; Methanosphaerula
Archaea; Euryarchaeota; Methanomicrobia; Methanomicrobiales; Methanoregulaceae; Methanosphaerula
Archaea; Euryarchaeota; Methanomicrobia; Methanomicrobiales; Methanoregulaceae; Methanosphaerula
Archaea; Euryarchaeota; Methanomicrobia; Methanomicrobiales; Methanoregulaceae; Methanosphaerula
Archaea; Euryarchaeota; Methanomicrobia; Methanomicrobiales; Methanoregulaceae; Methanosphaerula
Archaea; Euryarchaeota; Methanomicrobia; Methanomicrobiales; Methanoregulaceae; Methanosphaerula
Archaea; Euryarchaeota; Methanomicrobia; Methanomicrobiales; Methanoregulaceae; Methanosphaerula
Archaea; Euryarchaeota; Methanomicrobia; Methanomicrobiales; Methanoregulaceae; Methanosphaerula
Archaea; Euryarchaeota; Methanomicrobia; Methanomicrobiales; Methanoregulaceae; Methanosphaerula
Archaea; Euryarchaeota; Methanomicrobia; Methanomicrobiales; Methanoregulaceae; Methanosphaerula
Archaea; Euryarchaeota; Methanomicrobia; Methanomicrobiales; Methanoregulaceae; Methanosphaerula
Archaea; Euryarchaeota; Methanomicrobia; Methanomicrobiales; Methanoregulaceae; Methanosphaerula
Archaea; Euryarchaeota; Methanomicrobia; Methanomicrobiales; Methanoregulaceae; Methanosphaerula
Archaea; Euryarchaeota; Methanomicrobia; Methanomicrobiales; Methanoregulaceae; Methanosphaerula
Archaea; Euryarchaeota; Methanomicrobia; Methanomicrobiales; Methanoregulaceae; Methanosphaerula
Archaea; Euryarchaeota; Methanomicrobia; Methanomicrobiales; Methanoregulaceae; Methanosphaerula
Archaea; Euryarchaeota; Methanomicrobia; Methanomicrobiales; Methanoregulaceae; Methanosphaerula
Archaea; Euryarchaeota; Methanomicrobia; Methanomicrobiales; Methanoregulaceae; Methanosphaerula
Archaea; Euryarchaeota; Methanomicrobia; Methanomicrobiales; Methanoregulaceae; Methanosphaerula
Archaea; Euryarchaeota; Methanomicrobia; Methanomicrobiales; Methanoregulaceae; Methanosphaerula
Archaea; Euryarchaeota; Methanomicrobia; Methanomicrobiales; Methanoregulaceae; Methanosphaerula
Archaea; Euryarchaeota; Methanomicrobia; Methanomicrobiales; Methanoregulaceae; Methanosphaerula
Archaea; Euryarchaeota; Methanomicrobia; Methanomicrobiales; Methanoregulaceae; Methanosphaerula
Archaea; Euryarchaeota; Methanomicrobia; Methanomicrobiales; Methanoregulaceae; Methanosphaerula
Archaea; Euryarchaeota; Methanomicrobia; Methanomicrobiales; Methanoregulaceae; Methanosphaerula
Archaea; Euryarchaeota; Methanomicrobia; Methanomicrobiales; Methanoregulaceae; Methanosphaerula
Archaea; Euryarchaeota; Methanomicrobia; Methanomicrobiales; Methanoregulaceae; Methanosphaerula
Archaea; Euryarchaeota; Methanomicrobia; Methanomicrobiales; Methanoregulaceae; Methanosphaerula
Archaea; Euryarchaeota; Methanomicrobia; Methanomicrobiales; Methanoregulaceae; Methanosphaerula
Archaea; Euryarchaeota; Methanomicrobia; Methanomicrobiales; Methanoregulaceae; Methanosphaerula
Archaea; Euryarchaeota; Methanomicrobia; Methanomicrobiales; Methanospirillaceae; Methanospirillum
Archaea; Euryarchaeota; Methanomicrobia; Methanomicrobiales; Methanospirillaceae; Methanospirillum
Archaea; Euryarchaeota; Methanomicrobia; Methanomicrobiales; Methanospirillaceae; Methanospirillum
Archaea; Euryarchaeota; Methanomicrobia; Methanomicrobiales; Rice_Cluster_II; Rice_Cluster_II_ge
Archaea; Euryarchaeota; Methanomicrobia; Methanomicrobiales; Rice_Cluster_II; Rice_Cluster_II_ge
Archaea; Euryarchaeota; Methanomicrobia; Methanomicrobiales; Rice_Cluster_II; Rice_Cluster_II_ge
Archaea; Euryarchaeota; Methanomicrobia; Methanomicrobiales; Rice_Cluster_II; Rice_Cluster_II_ge
Archaea; Euryarchaeota; Methanomicrobia; Methanomicrobiales; Rice_Cluster_II; Rice_Cluster_II_ge
Archaea; Euryarchaeota; Methanomicrobia; Methanomicrobiales; Rice_Cluster_II; Rice_Cluster_II_ge
Archaea; Euryarchaeota; Methanomicrobia; Methanomicrobiales; Rice_Cluster_II; Rice_Cluster_II_ge
Archaea; Euryarchaeota; Methanomicrobia; Methanomicrobiales; Rice_Cluster_II; Rice_Cluster_II_ge
Archaea; Euryarchaeota; Methanomicrobia; Methanomicrobiales; Rice_Cluster_II; Rice_Cluster_II_ge
Archaea; Euryarchaeota; Methanomicrobia; Methanomicrobiales; Rice_Cluster_II; Rice_Cluster_II_ge
Archaea; Euryarchaeota; Methanomicrobia; Methanomicrobiales; Rice_Cluster_II; Rice_Cluster_II_ge
Archaea; Euryarchaeota; Methanomicrobia; Methanomicrobiales; Rice_Cluster_II; Rice_Cluster_II_ge
Archaea; Euryarchaeota; Methanomicrobia; Methanomicrobiales; Rice_Cluster_II; Rice_Cluster_II_ge
Archaea; Euryarchaeota; Methanomicrobia; Methanomicrobiales; Rice_Cluster_II; Rice_Cluster_II_ge
Archaea; Euryarchaeota; Methanomicrobia; Methanomicrobiales; Rice_Cluster_II; Rice_Cluster_II_ge
Archaea; Euryarchaeota; Methanomicrobia; Methanomicrobiales; Rice_Cluster_II; Rice_Cluster_II_ge
Archaea; Euryarchaeota; Methanomicrobia; Methanomicrobiales; Rice_Cluster_II; Rice_Cluster_II_ge
Archaea; Euryarchaeota; Methanomicrobia; Methanomicrobiales; Rice_Cluster_II; Rice_Cluster_II_ge
Archaea; Euryarchaeota; Methanomicrobia; Methanomicrobiales; Rice_Cluster_II; Rice_Cluster_II_ge
Archaea; Euryarchaeota; Methanomicrobia; Methanomicrobiales; Rice_Cluster_II; Rice_Cluster_II_ge
Archaea; Euryarchaeota; Methanomicrobia; Methanomicrobiales; Rice_Cluster_II; Rice_Cluster_II_ge
Archaea; Euryarchaeota; Methanomicrobia; Methanomicrobiales; Rice_Cluster_II; Rice_Cluster_II_ge
Archaea; Euryarchaeota; Methanomicrobia; Methanomicrobiales; Rice_Cluster_II; Rice_Cluster_II_ge
Archaea; Euryarchaeota; Methanomicrobia; Methanomicrobiales; Rice_Cluster_II; Rice_Cluster_II_ge
Archaea; Euryarchaeota; Methanomicrobia; Methanosarcinales; GOM_Arc_I; Candidatus_Methanoperedens
Archaea; Euryarchaeota; Methanomicrobia; Methanosarcinales; GOM_Arc_I; Candidatus_Methanoperedens
Archaea; Euryarchaeota; Methanomicrobia; Methanosarcinales; GOM_Arc_I; Candidatus_Methanoperedens
Archaea; Euryarchaeota; Methanomicrobia; Methanosarcinales; GOM_Arc_I; Candidatus_Methanoperedens
Archaea; Euryarchaeota; Methanomicrobia; Methanosarcinales; GOM_Arc_I; Candidatus_Methanoperedens
Archaea; Euryarchaeota; Methanomicrobia; Methanosarcinales; GOM_Arc_I; Candidatus_Methanoperedens
Archaea; Euryarchaeota; Methanomicrobia; Methanosarcinales; GOM_Arc_I; Candidatus_Methanoperedens
Archaea; Euryarchaeota; Methanomicrobia; Methanosarcinales; GOM_Arc_I; Candidatus_Methanoperedens
Archaea; Euryarchaeota; Methanomicrobia; Methanosarcinales; GOM_Arc_I; Candidatus_Methanoperedens
Archaea; Euryarchaeota; Methanomicrobia; Methanosarcinales; GOM_Arc_I; Candidatus_Methanoperedens
Archaea; Euryarchaeota; Methanomicrobia; Methanosarcinales; GOM_Arc_I; Candidatus_Methanoperedens
Archaea; Euryarchaeota; Methanomicrobia; Methanosarcinales; GOM_Arc_I; Candidatus_Methanoperedens
Archaea; Euryarchaeota; Methanomicrobia; Methanosarcinales; GOM_Arc_I; Candidatus_Methanoperedens
Archaea; Euryarchaeota; Methanomicrobia; Methanosarcinales; GOM_Arc_I; Candidatus_Methanoperedens
Archaea; Euryarchaeota; Methanomicrobia; Methanosarcinales; GOM_Arc_I; Candidatus_Methanoperedens
Archaea; Euryarchaeota; Methanomicrobia; Methanosarcinales; GOM_Arc_I; Candidatus_Methanoperedens
Archaea; Euryarchaeota; Methanomicrobia; Methanosarcinales; GOM_Arc_I; Candidatus_Methanoperedens
Archaea; Euryarchaeota; Methanomicrobia; Methanosarcinales; GOM_Arc_I; Candidatus_Methanoperedens
Archaea; Euryarchaeota; Methanomicrobia; Methanosarcinales; GOM_Arc_I; Candidatus_Methanoperedens
Archaea; Euryarchaeota; Methanomicrobia; Methanosarcinales; GOM_Arc_I; Candidatus_Methanoperedens
Archaea; Euryarchaeota; Methanomicrobia; Methanosarcinales; GOM_Arc_I; Candidatus_Methanoperedens
Archaea; Euryarchaeota; Methanomicrobia; Methanosarcinales; GOM_Arc_I; Candidatus_Methanoperedens
Archaea; Euryarchaeota; Methanomicrobia; Methanosarcinales; GOM_Arc_I; Candidatus_Methanoperedens
Archaea; Euryarchaeota; Methanomicrobia; Methanosarcinales; GOM_Arc_I; Candidatus_Methanoperedens
Archaea; Euryarchaeota; Methanomicrobia; Methanosarcinales; GOM_Arc_I; Candidatus_Methanoperedens
Archaea; Euryarchaeota; Methanomicrobia; Methanosarcinales; GOM_Arc_I; Candidatus_Methanoperedens
Archaea; Euryarchaeota; Methanomicrobia; Methanosarcinales; GOM_Arc_I; Candidatus_Methanoperedens
Archaea; Euryarchaeota; Methanomicrobia; Methanosarcinales; GOM_Arc_I; Candidatus_Methanoperedens
Archaea; Euryarchaeota; Methanomicrobia; Methanosarcinales; GOM_Arc_I; Candidatus_Methanoperedens
Archaea; Euryarchaeota; Methanomicrobia; Methanosarcinales; GOM_Arc_I; Candidatus_Methanoperedens
Archaea; Euryarchaeota; Methanomicrobia; Methanosarcinales; GOM_Arc_I; Candidatus_Methanoperedens
Archaea; Euryarchaeota; Methanomicrobia; Methanosarcinales; GOM_Arc_I; Candidatus_Methanoperedens
Archaea; Euryarchaeota; Methanomicrobia; Methanosarcinales; GOM_Arc_I; Candidatus_Methanoperedens
Archaea; Euryarchaeota; Methanomicrobia; Methanosarcinales; GOM_Arc_I; Candidatus_Methanoperedens
Archaea; Euryarchaeota; Methanomicrobia; Methanosarcinales; GOM_Arc_I; Candidatus_Methanoperedens
Archaea; Euryarchaeota; Methanomicrobia; Methanosarcinales; GOM_Arc_I; Candidatus_Methanoperedens
Archaea; Euryarchaeota; Methanomicrobia; Methanosarcinales; GOM_Arc_I; Candidatus_Methanoperedens
Archaea; Euryarchaeota; Methanomicrobia; Methanosarcinales; GOM_Arc_I; Candidatus_Methanoperedens
Archaea; Euryarchaeota; Methanomicrobia; Methanosarcinales; GOM_Arc_I; Candidatus_Methanoperedens
Archaea; Euryarchaeota; Methanomicrobia; Methanosarcinales; GOM_Arc_I; Candidatus_Methanoperedens
Archaea; Euryarchaeota; Methanomicrobia; Methanosarcinales; GOM_Arc_I; Candidatus_Methanoperedens
Archaea; Euryarchaeota; Methanomicrobia; Methanosarcinales; GOM_Arc_I; Candidatus_Methanoperedens
Archaea; Euryarchaeota; Methanomicrobia; Methanosarcinales; GOM_Arc_I; Candidatus_Methanoperedens
Archaea; Euryarchaeota; Methanomicrobia; Methanosarcinales; GOM_Arc_I; Candidatus_Methanoperedens
Archaea; Euryarchaeota; Methanomicrobia; Methanosarcinales; GOM_Arc_I; Candidatus_Methanoperedens
Archaea; Euryarchaeota; Methanomicrobia; Methanosarcinales; GOM_Arc_I; Candidatus_Methanoperedens
Archaea; Euryarchaeota; Methanomicrobia; Methanosarcinales; GOM_Arc_I; Candidatus_Methanoperedens
Archaea; Euryarchaeota; Methanomicrobia; Methanosarcinales; GOM_Arc_I; Candidatus_Methanoperedens
Archaea; Euryarchaeota; Methanomicrobia; Methanosarcinales; GOM_Arc_I; Candidatus_Methanoperedens
Archaea; Euryarchaeota; Methanomicrobia; Methanosarcinales; GOM_Arc_I; Candidatus_Methanoperedens
Archaea; Euryarchaeota; Methanomicrobia; Methanosarcinales; GOM_Arc_I; Candidatus_Methanoperedens
Archaea; Euryarchaeota; Methanomicrobia; Methanosarcinales; GOM_Arc_I; Candidatus_Methanoperedens
Archaea; Euryarchaeota; Methanomicrobia; Methanosarcinales; GOM_Arc_I; Candidatus_Methanoperedens
Archaea; Euryarchaeota; Methanomicrobia; Methanosarcinales; GOM_Arc_I; Candidatus_Methanoperedens
Archaea; Euryarchaeota; Methanomicrobia; Methanosarcinales; GOM_Arc_I; Candidatus_Methanoperedens
Archaea; Euryarchaeota; Methanomicrobia; Methanosarcinales; GOM_Arc_I; Candidatus_Methanoperedens
Archaea; Euryarchaeota; Methanomicrobia; Methanosarcinales; GOM_Arc_I; Candidatus_Methanoperedens
Archaea; Euryarchaeota; Methanomicrobia; Methanosarcinales; GOM_Arc_I; Candidatus_Methanoperedens
Archaea; Euryarchaeota; Methanomicrobia; Methanosarcinales; GOM_Arc_I; Candidatus_Methanoperedens
Archaea; Euryarchaeota; Methanomicrobia; Methanosarcinales; GOM_Arc_I; Candidatus_Methanoperedens
Archaea; Euryarchaeota; Methanomicrobia; Methanosarcinales; GOM_Arc_I; Candidatus_Methanoperedens
Archaea; Euryarchaeota; Methanomicrobia; Methanosarcinales; GOM_Arc_I; Candidatus_Methanoperedens
Archaea; Euryarchaeota; Methanomicrobia; Methanosarcinales; GOM_Arc_I; Candidatus_Methanoperedens
Archaea; Euryarchaeota; Methanomicrobia; Methanosarcinales; GOM_Arc_I; Candidatus_Methanoperedens
Archaea; Euryarchaeota; Methanomicrobia; Methanosarcinales; GOM_Arc_I; Candidatus_Methanoperedens
Archaea; Euryarchaeota; Methanomicrobia; Methanosarcinales; GOM_Arc_I; Candidatus_Methanoperedens
Archaea; Euryarchaeota; Methanomicrobia; Methanosarcinales; GOM_Arc_I; Candidatus_Methanoperedens
Archaea; Euryarchaeota; Methanomicrobia; Methanosarcinales; GOM_Arc_I; Candidatus_Methanoperedens
Archaea; Euryarchaeota; Methanomicrobia; Methanosarcinales; GOM_Arc_I; Candidatus_Methanoperedens
Archaea; Euryarchaeota; Methanomicrobia; Methanosarcinales; GOM_Arc_I; Candidatus_Methanoperedens
Archaea; Euryarchaeota; Methanomicrobia; Methanosarcinales; GOM_Arc_I; Candidatus_Methanoperedens
Archaea; Euryarchaeota; Methanomicrobia; Methanosarcinales; GOM_Arc_I; Candidatus_Methanoperedens
Archaea; Euryarchaeota; Methanomicrobia; Methanosarcinales; GOM_Arc_I; Candidatus_Methanoperedens
Archaea; Euryarchaeota; Methanomicrobia; Methanosarcinales; GOM_Arc_I; Candidatus_Methanoperedens
Archaea; Euryarchaeota; Methanomicrobia; Methanosarcinales; GOM_Arc_I; Candidatus_Methanoperedens
Archaea; Euryarchaeota; Methanomicrobia; Methanosarcinales; GOM_Arc_I; Candidatus_Methanoperedens
Archaea; Euryarchaeota; Methanomicrobia; Methanosarcinales; GOM_Arc_I; Candidatus_Methanoperedens
Archaea; Euryarchaeota; Methanomicrobia; Methanosarcinales; GOM_Arc_I; Candidatus_Methanoperedens
Archaea; Euryarchaeota; Methanomicrobia; Methanosarcinales; GOM_Arc_I; Candidatus_Methanoperedens
Archaea; Euryarchaeota; Methanomicrobia; Methanosarcinales; GOM_Arc_I; Candidatus_Methanoperedens
Archaea; Euryarchaeota; Methanomicrobia; Methanosarcinales; GOM_Arc_I; Candidatus_Methanoperedens
Archaea; Euryarchaeota; Methanomicrobia; Methanosarcinales; GOM_Arc_I; Candidatus_Methanoperedens
Archaea; Euryarchaeota; Methanomicrobia; Methanosarcinales; GOM_Arc_I; Candidatus_Methanoperedens
Archaea; Euryarchaeota; Methanomicrobia; Methanosarcinales; GOM_Arc_I; Candidatus_Methanoperedens
Archaea; Euryarchaeota; Methanomicrobia; Methanosarcinales; GOM_Arc_I; Candidatus_Methanoperedens
Archaea; Euryarchaeota; Methanomicrobia; Methanosarcinales; GOM_Arc_I; Candidatus_Methanoperedens
Archaea; Euryarchaeota; Methanomicrobia; Methanosarcinales; GOM_Arc_I; Candidatus_Methanoperedens
Archaea; Euryarchaeota; Methanomicrobia; Methanosarcinales; GOM_Arc_I; Candidatus_Methanoperedens
Archaea; Euryarchaeota; Methanomicrobia; Methanosarcinales; GOM_Arc_I; Candidatus_Methanoperedens
Archaea; Euryarchaeota; Methanomicrobia; Methanosarcinales; GOM_Arc_I; Candidatus_Methanoperedens
Archaea; Euryarchaeota; Methanomicrobia; Methanosarcinales; GOM_Arc_I; Candidatus_Methanoperedens
Archaea; Euryarchaeota; Methanomicrobia; Methanosarcinales; GOM_Arc_I; Candidatus_Methanoperedens
Archaea; Euryarchaeota; Methanomicrobia; Methanosarcinales; GOM_Arc_I; Candidatus_Methanoperedens
Archaea; Euryarchaeota; Methanomicrobia; Methanosarcinales; GOM_Arc_I; Candidatus_Methanoperedens
Archaea; Euryarchaeota; Methanomicrobia; Methanosarcinales; GOM_Arc_I; Candidatus_Methanoperedens
Archaea; Euryarchaeota; Methanomicrobia; Methanosarcinales; GOM_Arc_I; Candidatus_Methanoperedens
Archaea; Euryarchaeota; Methanomicrobia; Methanosarcinales; GOM_Arc_I; Candidatus_Methanoperedens
Archaea; Euryarchaeota; Methanomicrobia; Methanosarcinales; GOM_Arc_I; Candidatus_Methanoperedens
Archaea; Euryarchaeota; Methanomicrobia; Methanosarcinales; GOM_Arc_I; Candidatus_Methanoperedens
Archaea; Euryarchaeota; Methanomicrobia; Methanosarcinales; GOM_Arc_I; Candidatus_Methanoperedens
Archaea; Euryarchaeota; Methanomicrobia; Methanosarcinales; GOM_Arc_I; Candidatus_Methanoperedens
Archaea; Euryarchaeota; Methanomicrobia; Methanosarcinales; GOM_Arc_I; Candidatus_Methanoperedens
Archaea; Euryarchaeota; Methanomicrobia; Methanosarcinales; GOM_Arc_I; Candidatus_Methanoperedens
Archaea; Euryarchaeota; Methanomicrobia; Methanosarcinales; GOM_Arc_I; Candidatus_Methanoperedens
Archaea; Euryarchaeota; Methanomicrobia; Methanosarcinales; GOM_Arc_I; Candidatus_Methanoperedens
Archaea; Euryarchaeota; Methanomicrobia; Methanosarcinales; GOM_Arc_I; Candidatus_Methanoperedens
Archaea; Euryarchaeota; Methanomicrobia; Methanosarcinales; GOM_Arc_I; Candidatus_Methanoperedens
Archaea; Euryarchaeota; Methanomicrobia; Methanosarcinales; GOM_Arc_I; Candidatus_Methanoperedens
Archaea; Euryarchaeota; Methanomicrobia; Methanosarcinales; GOM_Arc_I; Candidatus_Methanoperedens
Archaea; Euryarchaeota; Methanomicrobia; Methanosarcinales; GOM_Arc_I; Candidatus_Methanoperedens
Archaea; Euryarchaeota; Methanomicrobia; Methanosarcinales; GOM_Arc_I; Candidatus_Methanoperedens
Archaea; Euryarchaeota; Methanomicrobia; Methanosarcinales; GOM_Arc_I; Candidatus_Methanoperedens
Archaea; Euryarchaeota; Methanomicrobia; Methanosarcinales; GOM_Arc_I; Candidatus_Methanoperedens
Archaea; Euryarchaeota; Methanomicrobia; Methanosarcinales; GOM_Arc_I; Candidatus_Methanoperedens
Archaea; Euryarchaeota; Methanomicrobia; Methanosarcinales; GOM_Arc_I; Candidatus_Methanoperedens
Archaea; Euryarchaeota; Methanomicrobia; Methanosarcinales; GOM_Arc_I; Candidatus_Methanoperedens
Archaea; Euryarchaeota; Methanomicrobia; Methanosarcinales; GOM_Arc_I; Candidatus_Methanoperedens
Archaea; Euryarchaeota; Methanomicrobia; Methanosarcinales; GOM_Arc_I; Candidatus_Methanoperedens
Archaea; Euryarchaeota; Methanomicrobia; Methanosarcinales; GOM_Arc_I; Candidatus_Methanoperedens
Archaea; Euryarchaeota; Methanomicrobia; Methanosarcinales; GOM_Arc_I; Candidatus_Methanoperedens
Archaea; Euryarchaeota; Methanomicrobia; Methanosarcinales; GOM_Arc_I; Candidatus_Methanoperedens
Archaea; Euryarchaeota; Methanomicrobia; Methanosarcinales; GOM_Arc_I; Candidatus_Methanoperedens
Archaea; Euryarchaeota; Methanomicrobia; Methanosarcinales; GOM_Arc_I; Candidatus_Methanoperedens
Archaea; Euryarchaeota; Methanomicrobia; Methanosarcinales; GOM_Arc_I; Candidatus_Methanoperedens
Archaea; Euryarchaeota; Methanomicrobia; Methanosarcinales; GOM_Arc_I; Candidatus_Methanoperedens
Archaea; Euryarchaeota; Methanomicrobia; Methanosarcinales; GOM_Arc_I; Candidatus_Methanoperedens
Archaea; Euryarchaeota; Methanomicrobia; Methanosarcinales; GOM_Arc_I; Candidatus_Methanoperedens
Archaea; Euryarchaeota; Methanomicrobia; Methanosarcinales; GOM_Arc_I; Candidatus_Methanoperedens
Archaea; Euryarchaeota; Methanomicrobia; Methanosarcinales; GOM_Arc_I; Candidatus_Methanoperedens
Archaea; Euryarchaeota; Methanomicrobia; Methanosarcinales; GOM_Arc_I; Candidatus_Methanoperedens
Archaea; Euryarchaeota; Methanomicrobia; Methanosarcinales; GOM_Arc_I; Candidatus_Methanoperedens
Archaea; Euryarchaeota; Methanomicrobia; Methanosarcinales; Methanosaetaceae; Methanosaeta
Archaea; Euryarchaeota; Methanomicrobia; Methanosarcinales; Methanosaetaceae; Methanosaeta
Archaea; Euryarchaeota; Methanomicrobia; Methanosarcinales; Methanosaetaceae; Methanosaeta
Archaea; Euryarchaeota; Methanomicrobia; Methanosarcinales; Methanosaetaceae; Methanosaeta
Archaea; Euryarchaeota; Methanomicrobia; Methanosarcinales; Methanosaetaceae; Methanosaeta
Archaea; Euryarchaeota; Methanomicrobia; Methanosarcinales; Methanosaetaceae; Methanosaeta
Archaea; Euryarchaeota; Methanomicrobia; Methanosarcinales; Methanosaetaceae; Methanosaeta
Archaea; Euryarchaeota; Methanomicrobia; Methanosarcinales; Methanosaetaceae; Methanosaeta
Archaea; Euryarchaeota; Methanomicrobia; Methanosarcinales; Methanosaetaceae; Methanosaeta
Archaea; Euryarchaeota; Methanomicrobia; Methanosarcinales; Methanosaetaceae; Methanosaeta
Archaea; Euryarchaeota; Methanomicrobia; Methanosarcinales; Methanosaetaceae; Methanosaeta
Archaea; Euryarchaeota; Methanomicrobia; Methanosarcinales; Methanosaetaceae; Methanosaeta
Archaea; Euryarchaeota; Methanomicrobia; Methanosarcinales; Methanosaetaceae; Methanosaeta
Archaea; Euryarchaeota; Methanomicrobia; Methanosarcinales; Methanosaetaceae; Methanosaeta
Archaea; Euryarchaeota; Methanomicrobia; Methanosarcinales; Methanosaetaceae; Methanosaeta
Archaea; Euryarchaeota; Methanomicrobia; Methanosarcinales; Methanosaetaceae; Methanosaeta
Archaea; Euryarchaeota; Methanomicrobia; Methanosarcinales; Methanosaetaceae; Methanosaeta
Archaea; Euryarchaeota; Methanomicrobia; Methanosarcinales; Methanosaetaceae; Methanosaeta
Archaea; Euryarchaeota; Methanomicrobia; Methanosarcinales; Methanosaetaceae; Methanosaeta
Archaea; Euryarchaeota; Methanomicrobia; Methanosarcinales; Methanosaetaceae; Methanosaeta
Archaea; Euryarchaeota; Methanomicrobia; Methanosarcinales; Methanosaetaceae; Methanosaeta
Archaea; Euryarchaeota; Methanomicrobia; Methanosarcinales; Methanosaetaceae; Methanosaeta
Archaea; Euryarchaeota; Methanomicrobia; Methanosarcinales; Methanosaetaceae; Methanosaeta
Archaea; Euryarchaeota; Methanomicrobia; Methanosarcinales; Methanosaetaceae; Methanosaeta
Archaea; Euryarchaeota; Methanomicrobia; Methanosarcinales; Methanosaetaceae; Methanosaeta
Archaea; Euryarchaeota; Methanomicrobia; Methanosarcinales; Methanosaetaceae; Methanosaeta
Archaea; Euryarchaeota; Methanomicrobia; Methanosarcinales; Methanosaetaceae; Methanosaeta
Archaea; Euryarchaeota; Methanomicrobia; Methanosarcinales; Methanosaetaceae; Methanosaeta
Archaea; Euryarchaeota; Methanomicrobia; Methanosarcinales; Methanosaetaceae; Methanosaeta
Archaea; Euryarchaeota; Methanomicrobia; Methanosarcinales; Methanosaetaceae; Methanosaeta
Archaea; Euryarchaeota; Methanomicrobia; Methanosarcinales; Methanosaetaceae; Methanosaeta
Archaea; Euryarchaeota; Methanomicrobia; Methanosarcinales; Methanosaetaceae; Methanosaeta
Archaea; Euryarchaeota; Methanomicrobia; Methanosarcinales; Methanosaetaceae; Methanosaeta
Archaea; Euryarchaeota; Methanomicrobia; Methanosarcinales; Methanosaetaceae; Methanosaeta
Archaea; Euryarchaeota; Methanomicrobia; Methanosarcinales; Methanosaetaceae; Methanosaeta
Archaea; Euryarchaeota; Methanomicrobia; Methanosarcinales; Methanosaetaceae; Methanosaeta
Archaea; Euryarchaeota; Methanomicrobia; Methanosarcinales; Methanosaetaceae; Methanosaeta
Archaea; Euryarchaeota; Methanomicrobia; Methanosarcinales; Methanosaetaceae; Methanosaeta
Archaea; Euryarchaeota; Methanomicrobia; Methanosarcinales; Methanosaetaceae; Methanosaeta
Archaea; Euryarchaeota; Methanomicrobia; Methanosarcinales; Methanosaetaceae; Methanosaeta
Archaea; Euryarchaeota; Methanomicrobia; Methanosarcinales; Methanosaetaceae; Methanosaeta
Archaea; Euryarchaeota; Methanomicrobia; Methanosarcinales; Methanosaetaceae; Methanosaeta
Archaea; Euryarchaeota; Methanomicrobia; Methanosarcinales; Methanosaetaceae; Methanosaeta
Archaea; Euryarchaeota; Methanomicrobia; Methanosarcinales; Methanosaetaceae; Methanosaeta
Archaea; Euryarchaeota; Methanomicrobia; Methanosarcinales; Methanosaetaceae; Methanosaeta
Archaea; Euryarchaeota; Methanomicrobia; Methanosarcinales; Methanosaetaceae; Methanosaeta
Archaea; Euryarchaeota; Methanomicrobia; Methanosarcinales; Methanosaetaceae; Methanosaeta
Archaea; Euryarchaeota; Methanomicrobia; Methanosarcinales; Methanosaetaceae; Methanosaeta
Archaea; Euryarchaeota; Methanomicrobia; Methanosarcinales; Methanosarcinaceae; Methanosarcina
Archaea; Euryarchaeota; Methanomicrobia; Methanosarcinales; Methanosarcinaceae; Methanosarcina
Archaea; Euryarchaeota; Methanomicrobia; Methanosarcinales; Methanosarcinaceae; Methanosarcina
Archaea; Euryarchaeota; Methanomicrobia; Methanosarcinales; Methanosarcinaceae; Methanosarcina
Archaea; Euryarchaeota; Methanomicrobia; Methanosarcinales; Methanosarcinaceae; Methanosarcina
Archaea; Euryarchaeota; Methanomicrobia; Methanosarcinales; Methanosarcinales_unclassified; Methanosarcinales_unclassified
# dark_hydrogen_oxidation (18 records):
Archaea; Euryarchaeota; Methanobacteria; Methanobacteriales; Methanobacteriaceae; Methanobacterium
Archaea; Euryarchaeota; Methanobacteria; Methanobacteriales; Methanobacteriaceae; Methanobacterium
Archaea; Euryarchaeota; Methanobacteria; Methanobacteriales; Methanobacteriaceae; Methanobacterium
Archaea; Euryarchaeota; Methanobacteria; Methanobacteriales; Methanobacteriaceae; Methanobacterium
Archaea; Euryarchaeota; Methanobacteria; Methanobacteriales; Methanobacteriaceae; Methanobacterium
Archaea; Euryarchaeota; Methanobacteria; Methanobacteriales; Methanobacteriaceae; Methanobacterium
Archaea; Euryarchaeota; Methanobacteria; Methanobacteriales; Methanobacteriaceae; Methanobacterium
Archaea; Euryarchaeota; Methanobacteria; Methanobacteriales; Methanobacteriaceae; Methanobacterium
Archaea; Euryarchaeota; Methanobacteria; Methanobacteriales; Methanobacteriaceae; Methanobacterium
Archaea; Euryarchaeota; Methanobacteria; Methanobacteriales; Methanobacteriaceae; Methanobacterium
Archaea; Euryarchaeota; Methanomicrobia; Methanomicrobiales; Methanospirillaceae; Methanospirillum
Archaea; Euryarchaeota; Methanomicrobia; Methanomicrobiales; Methanospirillaceae; Methanospirillum
Archaea; Euryarchaeota; Methanomicrobia; Methanomicrobiales; Methanospirillaceae; Methanospirillum
Archaea; Euryarchaeota; Methanomicrobia; Methanosarcinales; Methanosarcinaceae; Methanosarcina
Archaea; Euryarchaeota; Methanomicrobia; Methanosarcinales; Methanosarcinaceae; Methanosarcina
Archaea; Euryarchaeota; Methanomicrobia; Methanosarcinales; Methanosarcinaceae; Methanosarcina
Archaea; Euryarchaeota; Methanomicrobia; Methanosarcinales; Methanosarcinaceae; Methanosarcina
Archaea; Euryarchaeota; Methanomicrobia; Methanosarcinales; Methanosarcinaceae; Methanosarcina
# nitrogen_fixation (3 records):
Archaea; Euryarchaeota; Methanomicrobia; Methanomicrobiales; Methanospirillaceae; Methanospirillum
Archaea; Euryarchaeota; Methanomicrobia; Methanomicrobiales; Methanospirillaceae; Methanospirillum
Archaea; Euryarchaeota; Methanomicrobia; Methanomicrobiales; Methanospirillaceae; Methanospirillum
# chemoheterotrophy (375 records):
Archaea; Euryarchaeota; Methanomicrobia; Methanomicrobiales; Methanospirillaceae; Methanospirillum
Archaea; Euryarchaeota; Methanomicrobia; Methanomicrobiales; Methanospirillaceae; Methanospirillum
Archaea; Euryarchaeota; Methanomicrobia; Methanomicrobiales; Methanospirillaceae; Methanospirillum
Archaea; Euryarchaeota; Methanomicrobia; Methanosarcinales; Methanosaetaceae; Methanosaeta
Archaea; Euryarchaeota; Methanomicrobia; Methanosarcinales; Methanosaetaceae; Methanosaeta
Archaea; Euryarchaeota; Methanomicrobia; Methanosarcinales; Methanosaetaceae; Methanosaeta
Archaea; Euryarchaeota; Methanomicrobia; Methanosarcinales; Methanosaetaceae; Methanosaeta
Archaea; Euryarchaeota; Methanomicrobia; Methanosarcinales; Methanosaetaceae; Methanosaeta
Archaea; Euryarchaeota; Methanomicrobia; Methanosarcinales; Methanosaetaceae; Methanosaeta
Archaea; Euryarchaeota; Methanomicrobia; Methanosarcinales; Methanosaetaceae; Methanosaeta
Archaea; Euryarchaeota; Methanomicrobia; Methanosarcinales; Methanosaetaceae; Methanosaeta
Archaea; Euryarchaeota; Methanomicrobia; Methanosarcinales; Methanosaetaceae; Methanosaeta
Archaea; Euryarchaeota; Methanomicrobia; Methanosarcinales; Methanosaetaceae; Methanosaeta
Archaea; Euryarchaeota; Methanomicrobia; Methanosarcinales; Methanosaetaceae; Methanosaeta
Archaea; Euryarchaeota; Methanomicrobia; Methanosarcinales; Methanosaetaceae; Methanosaeta
Archaea; Euryarchaeota; Methanomicrobia; Methanosarcinales; Methanosaetaceae; Methanosaeta
Archaea; Euryarchaeota; Methanomicrobia; Methanosarcinales; Methanosaetaceae; Methanosaeta
Archaea; Euryarchaeota; Methanomicrobia; Methanosarcinales; Methanosaetaceae; Methanosaeta
Archaea; Euryarchaeota; Methanomicrobia; Methanosarcinales; Methanosaetaceae; Methanosaeta
Archaea; Euryarchaeota; Methanomicrobia; Methanosarcinales; Methanosaetaceae; Methanosaeta
Archaea; Euryarchaeota; Methanomicrobia; Methanosarcinales; Methanosaetaceae; Methanosaeta
Archaea; Euryarchaeota; Methanomicrobia; Methanosarcinales; Methanosaetaceae; Methanosaeta
Archaea; Euryarchaeota; Methanomicrobia; Methanosarcinales; Methanosaetaceae; Methanosaeta
Archaea; Euryarchaeota; Methanomicrobia; Methanosarcinales; Methanosaetaceae; Methanosaeta
Archaea; Euryarchaeota; Methanomicrobia; Methanosarcinales; Methanosaetaceae; Methanosaeta
Archaea; Euryarchaeota; Methanomicrobia; Methanosarcinales; Methanosaetaceae; Methanosaeta
Archaea; Euryarchaeota; Methanomicrobia; Methanosarcinales; Methanosaetaceae; Methanosaeta
Archaea; Euryarchaeota; Methanomicrobia; Methanosarcinales; Methanosaetaceae; Methanosaeta
Archaea; Euryarchaeota; Methanomicrobia; Methanosarcinales; Methanosaetaceae; Methanosaeta
Archaea; Euryarchaeota; Methanomicrobia; Methanosarcinales; Methanosaetaceae; Methanosaeta
Archaea; Euryarchaeota; Methanomicrobia; Methanosarcinales; Methanosaetaceae; Methanosaeta
Archaea; Euryarchaeota; Methanomicrobia; Methanosarcinales; Methanosaetaceae; Methanosaeta
Archaea; Euryarchaeota; Methanomicrobia; Methanosarcinales; Methanosaetaceae; Methanosaeta
Archaea; Euryarchaeota; Methanomicrobia; Methanosarcinales; Methanosaetaceae; Methanosaeta
Archaea; Euryarchaeota; Methanomicrobia; Methanosarcinales; Methanosaetaceae; Methanosaeta
Archaea; Euryarchaeota; Methanomicrobia; Methanosarcinales; Methanosaetaceae; Methanosaeta
Archaea; Euryarchaeota; Methanomicrobia; Methanosarcinales; Methanosaetaceae; Methanosaeta
Archaea; Euryarchaeota; Methanomicrobia; Methanosarcinales; Methanosaetaceae; Methanosaeta
Archaea; Euryarchaeota; Methanomicrobia; Methanosarcinales; Methanosaetaceae; Methanosaeta
Archaea; Euryarchaeota; Methanomicrobia; Methanosarcinales; Methanosaetaceae; Methanosaeta
Archaea; Euryarchaeota; Methanomicrobia; Methanosarcinales; Methanosaetaceae; Methanosaeta
Archaea; Euryarchaeota; Methanomicrobia; Methanosarcinales; Methanosaetaceae; Methanosaeta
Archaea; Euryarchaeota; Methanomicrobia; Methanosarcinales; Methanosaetaceae; Methanosaeta
Archaea; Euryarchaeota; Methanomicrobia; Methanosarcinales; Methanosaetaceae; Methanosaeta
Archaea; Euryarchaeota; Methanomicrobia; Methanosarcinales; Methanosaetaceae; Methanosaeta
Archaea; Euryarchaeota; Methanomicrobia; Methanosarcinales; Methanosaetaceae; Methanosaeta
Archaea; Euryarchaeota; Methanomicrobia; Methanosarcinales; Methanosaetaceae; Methanosaeta
Archaea; Euryarchaeota; Methanomicrobia; Methanosarcinales; Methanosaetaceae; Methanosaeta
Archaea; Euryarchaeota; Methanomicrobia; Methanosarcinales; Methanosaetaceae; Methanosaeta
Archaea; Euryarchaeota; Methanomicrobia; Methanosarcinales; Methanosaetaceae; Methanosaeta
Archaea; Euryarchaeota; Methanomicrobia; Methanosarcinales; Methanosaetaceae; Methanosaeta
Archaea; Euryarchaeota; Methanomicrobia; Methanosarcinales; Methanosarcinaceae; Methanosarcina
Archaea; Euryarchaeota; Methanomicrobia; Methanosarcinales; Methanosarcinaceae; Methanosarcina
Archaea; Euryarchaeota; Methanomicrobia; Methanosarcinales; Methanosarcinaceae; Methanosarcina
Archaea; Euryarchaeota; Methanomicrobia; Methanosarcinales; Methanosarcinaceae; Methanosarcina
Archaea; Euryarchaeota; Methanomicrobia; Methanosarcinales; Methanosarcinaceae; Methanosarcina
Archaea; Euryarchaeota; Thermoplasmata; Thermoplasmatales; AMOS1A-4113-D04; AMOS1A-4113-D04_ge
Archaea; Euryarchaeota; Thermoplasmata; Thermoplasmatales; AMOS1A-4113-D04; AMOS1A-4113-D04_ge
Archaea; Euryarchaeota; Thermoplasmata; Thermoplasmatales; AMOS1A-4113-D04; AMOS1A-4113-D04_ge
Archaea; Euryarchaeota; Thermoplasmata; Thermoplasmatales; AMOS1A-4113-D04; AMOS1A-4113-D04_ge
Archaea; Euryarchaeota; Thermoplasmata; Thermoplasmatales; AMOS1A-4113-D04; AMOS1A-4113-D04_ge
Archaea; Euryarchaeota; Thermoplasmata; Thermoplasmatales; AMOS1A-4113-D04; AMOS1A-4113-D04_ge
Archaea; Euryarchaeota; Thermoplasmata; Thermoplasmatales; AMOS1A-4113-D04; AMOS1A-4113-D04_ge
Archaea; Euryarchaeota; Thermoplasmata; Thermoplasmatales; AMOS1A-4113-D04; AMOS1A-4113-D04_ge
Archaea; Euryarchaeota; Thermoplasmata; Thermoplasmatales; AMOS1A-4113-D04; AMOS1A-4113-D04_ge
Archaea; Euryarchaeota; Thermoplasmata; Thermoplasmatales; AMOS1A-4113-D04; AMOS1A-4113-D04_ge
Archaea; Euryarchaeota; Thermoplasmata; Thermoplasmatales; AMOS1A-4113-D04; AMOS1A-4113-D04_ge
Archaea; Euryarchaeota; Thermoplasmata; Thermoplasmatales; AMOS1A-4113-D04; AMOS1A-4113-D04_ge
Archaea; Euryarchaeota; Thermoplasmata; Thermoplasmatales; AMOS1A-4113-D04; AMOS1A-4113-D04_ge
Archaea; Euryarchaeota; Thermoplasmata; Thermoplasmatales; AMOS1A-4113-D04; AMOS1A-4113-D04_ge
Archaea; Euryarchaeota; Thermoplasmata; Thermoplasmatales; AMOS1A-4113-D04; AMOS1A-4113-D04_ge
Archaea; Euryarchaeota; Thermoplasmata; Thermoplasmatales; AMOS1A-4113-D04; AMOS1A-4113-D04_ge
Archaea; Euryarchaeota; Thermoplasmata; Thermoplasmatales; AMOS1A-4113-D04; AMOS1A-4113-D04_ge
Archaea; Euryarchaeota; Thermoplasmata; Thermoplasmatales; AMOS1A-4113-D04; AMOS1A-4113-D04_ge
Archaea; Euryarchaeota; Thermoplasmata; Thermoplasmatales; AMOS1A-4113-D04; AMOS1A-4113-D04_ge
Archaea; Euryarchaeota; Thermoplasmata; Thermoplasmatales; AMOS1A-4113-D04; AMOS1A-4113-D04_ge
Archaea; Euryarchaeota; Thermoplasmata; Thermoplasmatales; AMOS1A-4113-D04; AMOS1A-4113-D04_ge
Archaea; Euryarchaeota; Thermoplasmata; Thermoplasmatales; AMOS1A-4113-D04; AMOS1A-4113-D04_ge
Archaea; Euryarchaeota; Thermoplasmata; Thermoplasmatales; AMOS1A-4113-D04; AMOS1A-4113-D04_ge
Archaea; Euryarchaeota; Thermoplasmata; Thermoplasmatales; AMOS1A-4113-D04; AMOS1A-4113-D04_ge
Archaea; Euryarchaeota; Thermoplasmata; Thermoplasmatales; AMOS1A-4113-D04; AMOS1A-4113-D04_ge
Archaea; Euryarchaeota; Thermoplasmata; Thermoplasmatales; AMOS1A-4113-D04; AMOS1A-4113-D04_ge
Archaea; Euryarchaeota; Thermoplasmata; Thermoplasmatales; AMOS1A-4113-D04; AMOS1A-4113-D04_ge
Archaea; Euryarchaeota; Thermoplasmata; Thermoplasmatales; AMOS1A-4113-D04; AMOS1A-4113-D04_ge
Archaea; Euryarchaeota; Thermoplasmata; Thermoplasmatales; AMOS1A-4113-D04; AMOS1A-4113-D04_ge
Archaea; Euryarchaeota; Thermoplasmata; Thermoplasmatales; AMOS1A-4113-D04; AMOS1A-4113-D04_ge
Archaea; Euryarchaeota; Thermoplasmata; Thermoplasmatales; AMOS1A-4113-D04; AMOS1A-4113-D04_ge
Archaea; Euryarchaeota; Thermoplasmata; Thermoplasmatales; AMOS1A-4113-D04; AMOS1A-4113-D04_ge
Archaea; Euryarchaeota; Thermoplasmata; Thermoplasmatales; AMOS1A-4113-D04; AMOS1A-4113-D04_ge
Archaea; Euryarchaeota; Thermoplasmata; Thermoplasmatales; AMOS1A-4113-D04; AMOS1A-4113-D04_ge
Archaea; Euryarchaeota; Thermoplasmata; Thermoplasmatales; AMOS1A-4113-D04; AMOS1A-4113-D04_ge
Archaea; Euryarchaeota; Thermoplasmata; Thermoplasmatales; AMOS1A-4113-D04; AMOS1A-4113-D04_ge
Archaea; Euryarchaeota; Thermoplasmata; Thermoplasmatales; AMOS1A-4113-D04; AMOS1A-4113-D04_ge
Archaea; Euryarchaeota; Thermoplasmata; Thermoplasmatales; AMOS1A-4113-D04; AMOS1A-4113-D04_ge
Archaea; Euryarchaeota; Thermoplasmata; Thermoplasmatales; AMOS1A-4113-D04; AMOS1A-4113-D04_ge
Archaea; Euryarchaeota; Thermoplasmata; Thermoplasmatales; CCA47; CCA47_ge
Archaea; Euryarchaeota; Thermoplasmata; Thermoplasmatales; CCA47; CCA47_ge
Archaea; Euryarchaeota; Thermoplasmata; Thermoplasmatales; Marine_Benthic_Group_D_and_DHVEG-1; Marine_Benthic_Group_D_and_DHVEG-1_ge
Archaea; Euryarchaeota; Thermoplasmata; Thermoplasmatales; Marine_Benthic_Group_D_and_DHVEG-1; Marine_Benthic_Group_D_and_DHVEG-1_ge
Archaea; Euryarchaeota; Thermoplasmata; Thermoplasmatales; Marine_Benthic_Group_D_and_DHVEG-1; Marine_Benthic_Group_D_and_DHVEG-1_ge
Archaea; Euryarchaeota; Thermoplasmata; Thermoplasmatales; Marine_Benthic_Group_D_and_DHVEG-1; Marine_Benthic_Group_D_and_DHVEG-1_ge
Archaea; Euryarchaeota; Thermoplasmata; Thermoplasmatales; Marine_Benthic_Group_D_and_DHVEG-1; Marine_Benthic_Group_D_and_DHVEG-1_ge
Archaea; Euryarchaeota; Thermoplasmata; Thermoplasmatales; Marine_Benthic_Group_D_and_DHVEG-1; Marine_Benthic_Group_D_and_DHVEG-1_ge
Archaea; Euryarchaeota; Thermoplasmata; Thermoplasmatales; Marine_Benthic_Group_D_and_DHVEG-1; Marine_Benthic_Group_D_and_DHVEG-1_ge
Archaea; Euryarchaeota; Thermoplasmata; Thermoplasmatales; Marine_Benthic_Group_D_and_DHVEG-1; Marine_Benthic_Group_D_and_DHVEG-1_ge
Archaea; Euryarchaeota; Thermoplasmata; Thermoplasmatales; Marine_Benthic_Group_D_and_DHVEG-1; Marine_Benthic_Group_D_and_DHVEG-1_ge
Archaea; Euryarchaeota; Thermoplasmata; Thermoplasmatales; Marine_Benthic_Group_D_and_DHVEG-1; Marine_Benthic_Group_D_and_DHVEG-1_ge
Archaea; Euryarchaeota; Thermoplasmata; Thermoplasmatales; Marine_Benthic_Group_D_and_DHVEG-1; Marine_Benthic_Group_D_and_DHVEG-1_ge
Archaea; Euryarchaeota; Thermoplasmata; Thermoplasmatales; Marine_Benthic_Group_D_and_DHVEG-1; Marine_Benthic_Group_D_and_DHVEG-1_ge
Archaea; Euryarchaeota; Thermoplasmata; Thermoplasmatales; Marine_Benthic_Group_D_and_DHVEG-1; Marine_Benthic_Group_D_and_DHVEG-1_ge
Archaea; Euryarchaeota; Thermoplasmata; Thermoplasmatales; Marine_Benthic_Group_D_and_DHVEG-1; Marine_Benthic_Group_D_and_DHVEG-1_ge
Archaea; Euryarchaeota; Thermoplasmata; Thermoplasmatales; Marine_Benthic_Group_D_and_DHVEG-1; Marine_Benthic_Group_D_and_DHVEG-1_ge
Archaea; Euryarchaeota; Thermoplasmata; Thermoplasmatales; Marine_Benthic_Group_D_and_DHVEG-1; Marine_Benthic_Group_D_and_DHVEG-1_ge
Archaea; Euryarchaeota; Thermoplasmata; Thermoplasmatales; Marine_Benthic_Group_D_and_DHVEG-1; Marine_Benthic_Group_D_and_DHVEG-1_ge
Archaea; Euryarchaeota; Thermoplasmata; Thermoplasmatales; Marine_Benthic_Group_D_and_DHVEG-1; Marine_Benthic_Group_D_and_DHVEG-1_ge
Archaea; Euryarchaeota; Thermoplasmata; Thermoplasmatales; Marine_Benthic_Group_D_and_DHVEG-1; Marine_Benthic_Group_D_and_DHVEG-1_ge
Archaea; Euryarchaeota; Thermoplasmata; Thermoplasmatales; Marine_Benthic_Group_D_and_DHVEG-1; Marine_Benthic_Group_D_and_DHVEG-1_ge
Archaea; Euryarchaeota; Thermoplasmata; Thermoplasmatales; Marine_Benthic_Group_D_and_DHVEG-1; Marine_Benthic_Group_D_and_DHVEG-1_ge
Archaea; Euryarchaeota; Thermoplasmata; Thermoplasmatales; Marine_Benthic_Group_D_and_DHVEG-1; Marine_Benthic_Group_D_and_DHVEG-1_ge
Archaea; Euryarchaeota; Thermoplasmata; Thermoplasmatales; Marine_Benthic_Group_D_and_DHVEG-1; Marine_Benthic_Group_D_and_DHVEG-1_ge
Archaea; Euryarchaeota; Thermoplasmata; Thermoplasmatales; Marine_Benthic_Group_D_and_DHVEG-1; Marine_Benthic_Group_D_and_DHVEG-1_ge
Archaea; Euryarchaeota; Thermoplasmata; Thermoplasmatales; Marine_Benthic_Group_D_and_DHVEG-1; Marine_Benthic_Group_D_and_DHVEG-1_ge
Archaea; Euryarchaeota; Thermoplasmata; Thermoplasmatales; Marine_Benthic_Group_D_and_DHVEG-1; Marine_Benthic_Group_D_and_DHVEG-1_ge
Archaea; Euryarchaeota; Thermoplasmata; Thermoplasmatales; Marine_Benthic_Group_D_and_DHVEG-1; Marine_Benthic_Group_D_and_DHVEG-1_ge
Archaea; Euryarchaeota; Thermoplasmata; Thermoplasmatales; Marine_Benthic_Group_D_and_DHVEG-1; Marine_Benthic_Group_D_and_DHVEG-1_ge
Archaea; Euryarchaeota; Thermoplasmata; Thermoplasmatales; Marine_Benthic_Group_D_and_DHVEG-1; Marine_Benthic_Group_D_and_DHVEG-1_ge
Archaea; Euryarchaeota; Thermoplasmata; Thermoplasmatales; Marine_Benthic_Group_D_and_DHVEG-1; Marine_Benthic_Group_D_and_DHVEG-1_ge
Archaea; Euryarchaeota; Thermoplasmata; Thermoplasmatales; Marine_Benthic_Group_D_and_DHVEG-1; Marine_Benthic_Group_D_and_DHVEG-1_ge
Archaea; Euryarchaeota; Thermoplasmata; Thermoplasmatales; Marine_Benthic_Group_D_and_DHVEG-1; Marine_Benthic_Group_D_and_DHVEG-1_ge
Archaea; Euryarchaeota; Thermoplasmata; Thermoplasmatales; Marine_Benthic_Group_D_and_DHVEG-1; Marine_Benthic_Group_D_and_DHVEG-1_ge
Archaea; Euryarchaeota; Thermoplasmata; Thermoplasmatales; Marine_Benthic_Group_D_and_DHVEG-1; Marine_Benthic_Group_D_and_DHVEG-1_ge
Archaea; Euryarchaeota; Thermoplasmata; Thermoplasmatales; Marine_Benthic_Group_D_and_DHVEG-1; Marine_Benthic_Group_D_and_DHVEG-1_ge
Archaea; Euryarchaeota; Thermoplasmata; Thermoplasmatales; Marine_Benthic_Group_D_and_DHVEG-1; Marine_Benthic_Group_D_and_DHVEG-1_ge
Archaea; Euryarchaeota; Thermoplasmata; Thermoplasmatales; Marine_Benthic_Group_D_and_DHVEG-1; Marine_Benthic_Group_D_and_DHVEG-1_ge
Archaea; Euryarchaeota; Thermoplasmata; Thermoplasmatales; Marine_Benthic_Group_D_and_DHVEG-1; Marine_Benthic_Group_D_and_DHVEG-1_ge
Archaea; Euryarchaeota; Thermoplasmata; Thermoplasmatales; Marine_Benthic_Group_D_and_DHVEG-1; Marine_Benthic_Group_D_and_DHVEG-1_ge
Archaea; Euryarchaeota; Thermoplasmata; Thermoplasmatales; Marine_Benthic_Group_D_and_DHVEG-1; Marine_Benthic_Group_D_and_DHVEG-1_ge
Archaea; Euryarchaeota; Thermoplasmata; Thermoplasmatales; Marine_Benthic_Group_D_and_DHVEG-1; Marine_Benthic_Group_D_and_DHVEG-1_ge
Archaea; Euryarchaeota; Thermoplasmata; Thermoplasmatales; Marine_Benthic_Group_D_and_DHVEG-1; Marine_Benthic_Group_D_and_DHVEG-1_ge
Archaea; Euryarchaeota; Thermoplasmata; Thermoplasmatales; Marine_Benthic_Group_D_and_DHVEG-1; Marine_Benthic_Group_D_and_DHVEG-1_ge
Archaea; Euryarchaeota; Thermoplasmata; Thermoplasmatales; Marine_Benthic_Group_D_and_DHVEG-1; Marine_Benthic_Group_D_and_DHVEG-1_ge
Archaea; Euryarchaeota; Thermoplasmata; Thermoplasmatales; Marine_Benthic_Group_D_and_DHVEG-1; Marine_Benthic_Group_D_and_DHVEG-1_ge
Archaea; Euryarchaeota; Thermoplasmata; Thermoplasmatales; Marine_Benthic_Group_D_and_DHVEG-1; Marine_Benthic_Group_D_and_DHVEG-1_ge
Archaea; Euryarchaeota; Thermoplasmata; Thermoplasmatales; Marine_Benthic_Group_D_and_DHVEG-1; Marine_Benthic_Group_D_and_DHVEG-1_ge
Archaea; Euryarchaeota; Thermoplasmata; Thermoplasmatales; Terrestrial_Miscellaneous_Gp(TMEG); Terrestrial_Miscellaneous_Gp(TMEG)_ge
Archaea; Euryarchaeota; Thermoplasmata; Thermoplasmatales; Terrestrial_Miscellaneous_Gp(TMEG); Terrestrial_Miscellaneous_Gp(TMEG)_ge
Archaea; Euryarchaeota; Thermoplasmata; Thermoplasmatales; Terrestrial_Miscellaneous_Gp(TMEG); Terrestrial_Miscellaneous_Gp(TMEG)_ge
Archaea; Euryarchaeota; Thermoplasmata; Thermoplasmatales; Terrestrial_Miscellaneous_Gp(TMEG); Terrestrial_Miscellaneous_Gp(TMEG)_ge
Archaea; Euryarchaeota; Thermoplasmata; Thermoplasmatales; Terrestrial_Miscellaneous_Gp(TMEG); Terrestrial_Miscellaneous_Gp(TMEG)_ge
Archaea; Euryarchaeota; Thermoplasmata; Thermoplasmatales; Terrestrial_Miscellaneous_Gp(TMEG); Terrestrial_Miscellaneous_Gp(TMEG)_ge
Archaea; Euryarchaeota; Thermoplasmata; Thermoplasmatales; Terrestrial_Miscellaneous_Gp(TMEG); Terrestrial_Miscellaneous_Gp(TMEG)_ge
Archaea; Euryarchaeota; Thermoplasmata; Thermoplasmatales; Terrestrial_Miscellaneous_Gp(TMEG); Terrestrial_Miscellaneous_Gp(TMEG)_ge
Archaea; Euryarchaeota; Thermoplasmata; Thermoplasmatales; Terrestrial_Miscellaneous_Gp(TMEG); Terrestrial_Miscellaneous_Gp(TMEG)_ge
Archaea; Euryarchaeota; Thermoplasmata; Thermoplasmatales; Terrestrial_Miscellaneous_Gp(TMEG); Terrestrial_Miscellaneous_Gp(TMEG)_ge
Archaea; Euryarchaeota; Thermoplasmata; Thermoplasmatales; Terrestrial_Miscellaneous_Gp(TMEG); Terrestrial_Miscellaneous_Gp(TMEG)_ge
Archaea; Euryarchaeota; Thermoplasmata; Thermoplasmatales; Terrestrial_Miscellaneous_Gp(TMEG); Terrestrial_Miscellaneous_Gp(TMEG)_ge
Archaea; Euryarchaeota; Thermoplasmata; Thermoplasmatales; Terrestrial_Miscellaneous_Gp(TMEG); Terrestrial_Miscellaneous_Gp(TMEG)_ge
Archaea; Euryarchaeota; Thermoplasmata; Thermoplasmatales; Terrestrial_Miscellaneous_Gp(TMEG); Terrestrial_Miscellaneous_Gp(TMEG)_ge
Archaea; Euryarchaeota; Thermoplasmata; Thermoplasmatales; Terrestrial_Miscellaneous_Gp(TMEG); Terrestrial_Miscellaneous_Gp(TMEG)_ge
Archaea; Euryarchaeota; Thermoplasmata; Thermoplasmatales; Terrestrial_Miscellaneous_Gp(TMEG); Terrestrial_Miscellaneous_Gp(TMEG)_ge
Archaea; Euryarchaeota; Thermoplasmata; Thermoplasmatales; Terrestrial_Miscellaneous_Gp(TMEG); Terrestrial_Miscellaneous_Gp(TMEG)_ge
Archaea; Euryarchaeota; Thermoplasmata; Thermoplasmatales; Terrestrial_Miscellaneous_Gp(TMEG); Terrestrial_Miscellaneous_Gp(TMEG)_ge
Archaea; Euryarchaeota; Thermoplasmata; Thermoplasmatales; Terrestrial_Miscellaneous_Gp(TMEG); Terrestrial_Miscellaneous_Gp(TMEG)_ge
Archaea; Euryarchaeota; Thermoplasmata; Thermoplasmatales; Terrestrial_Miscellaneous_Gp(TMEG); Terrestrial_Miscellaneous_Gp(TMEG)_ge
Archaea; Euryarchaeota; Thermoplasmata; Thermoplasmatales; Terrestrial_Miscellaneous_Gp(TMEG); Terrestrial_Miscellaneous_Gp(TMEG)_ge
Archaea; Euryarchaeota; Thermoplasmata; Thermoplasmatales; Terrestrial_Miscellaneous_Gp(TMEG); Terrestrial_Miscellaneous_Gp(TMEG)_ge
Archaea; Euryarchaeota; Thermoplasmata; Thermoplasmatales; Terrestrial_Miscellaneous_Gp(TMEG); Terrestrial_Miscellaneous_Gp(TMEG)_ge
Archaea; Euryarchaeota; Thermoplasmata; Thermoplasmatales; Terrestrial_Miscellaneous_Gp(TMEG); Terrestrial_Miscellaneous_Gp(TMEG)_ge
Archaea; Euryarchaeota; Thermoplasmata; Thermoplasmatales; Terrestrial_Miscellaneous_Gp(TMEG); Terrestrial_Miscellaneous_Gp(TMEG)_ge
Archaea; Euryarchaeota; Thermoplasmata; Thermoplasmatales; Terrestrial_Miscellaneous_Gp(TMEG); Terrestrial_Miscellaneous_Gp(TMEG)_ge
Archaea; Euryarchaeota; Thermoplasmata; Thermoplasmatales; Terrestrial_Miscellaneous_Gp(TMEG); Terrestrial_Miscellaneous_Gp(TMEG)_ge
Archaea; Euryarchaeota; Thermoplasmata; Thermoplasmatales; Terrestrial_Miscellaneous_Gp(TMEG); Terrestrial_Miscellaneous_Gp(TMEG)_ge
Archaea; Euryarchaeota; Thermoplasmata; Thermoplasmatales; Terrestrial_Miscellaneous_Gp(TMEG); Terrestrial_Miscellaneous_Gp(TMEG)_ge
Archaea; Euryarchaeota; Thermoplasmata; Thermoplasmatales; Terrestrial_Miscellaneous_Gp(TMEG); Terrestrial_Miscellaneous_Gp(TMEG)_ge
Archaea; Euryarchaeota; Thermoplasmata; Thermoplasmatales; Terrestrial_Miscellaneous_Gp(TMEG); Terrestrial_Miscellaneous_Gp(TMEG)_ge
Archaea; Euryarchaeota; Thermoplasmata; Thermoplasmatales; Terrestrial_Miscellaneous_Gp(TMEG); Terrestrial_Miscellaneous_Gp(TMEG)_ge
Archaea; Euryarchaeota; Thermoplasmata; Thermoplasmatales; Terrestrial_Miscellaneous_Gp(TMEG); Terrestrial_Miscellaneous_Gp(TMEG)_ge
Archaea; Euryarchaeota; Thermoplasmata; Thermoplasmatales; Terrestrial_Miscellaneous_Gp(TMEG); Terrestrial_Miscellaneous_Gp(TMEG)_ge
Archaea; Euryarchaeota; Thermoplasmata; Thermoplasmatales; Terrestrial_Miscellaneous_Gp(TMEG); Terrestrial_Miscellaneous_Gp(TMEG)_ge
Archaea; Euryarchaeota; Thermoplasmata; Thermoplasmatales; Terrestrial_Miscellaneous_Gp(TMEG); Terrestrial_Miscellaneous_Gp(TMEG)_ge
Archaea; Euryarchaeota; Thermoplasmata; Thermoplasmatales; Terrestrial_Miscellaneous_Gp(TMEG); Terrestrial_Miscellaneous_Gp(TMEG)_ge
Archaea; Euryarchaeota; Thermoplasmata; Thermoplasmatales; Terrestrial_Miscellaneous_Gp(TMEG); Terrestrial_Miscellaneous_Gp(TMEG)_ge
Archaea; Euryarchaeota; Thermoplasmata; Thermoplasmatales; Terrestrial_Miscellaneous_Gp(TMEG); Terrestrial_Miscellaneous_Gp(TMEG)_ge
Archaea; Euryarchaeota; Thermoplasmata; Thermoplasmatales; Terrestrial_Miscellaneous_Gp(TMEG); Terrestrial_Miscellaneous_Gp(TMEG)_ge
Archaea; Euryarchaeota; Thermoplasmata; Thermoplasmatales; Terrestrial_Miscellaneous_Gp(TMEG); Terrestrial_Miscellaneous_Gp(TMEG)_ge
Archaea; Euryarchaeota; Thermoplasmata; Thermoplasmatales; Terrestrial_Miscellaneous_Gp(TMEG); Terrestrial_Miscellaneous_Gp(TMEG)_ge
Archaea; Euryarchaeota; Thermoplasmata; Thermoplasmatales; Terrestrial_Miscellaneous_Gp(TMEG); Terrestrial_Miscellaneous_Gp(TMEG)_ge
Archaea; Euryarchaeota; Thermoplasmata; Thermoplasmatales; Terrestrial_Miscellaneous_Gp(TMEG); Terrestrial_Miscellaneous_Gp(TMEG)_ge
Archaea; Euryarchaeota; Thermoplasmata; Thermoplasmatales; Terrestrial_Miscellaneous_Gp(TMEG); Terrestrial_Miscellaneous_Gp(TMEG)_ge
Archaea; Euryarchaeota; Thermoplasmata; Thermoplasmatales; Terrestrial_Miscellaneous_Gp(TMEG); Terrestrial_Miscellaneous_Gp(TMEG)_ge
Archaea; Euryarchaeota; Thermoplasmata; Thermoplasmatales; Terrestrial_Miscellaneous_Gp(TMEG); Terrestrial_Miscellaneous_Gp(TMEG)_ge
Archaea; Euryarchaeota; Thermoplasmata; Thermoplasmatales; Terrestrial_Miscellaneous_Gp(TMEG); Terrestrial_Miscellaneous_Gp(TMEG)_ge
Archaea; Euryarchaeota; Thermoplasmata; Thermoplasmatales; Terrestrial_Miscellaneous_Gp(TMEG); Terrestrial_Miscellaneous_Gp(TMEG)_ge
Archaea; Euryarchaeota; Thermoplasmata; Thermoplasmatales; Terrestrial_Miscellaneous_Gp(TMEG); Terrestrial_Miscellaneous_Gp(TMEG)_ge
Archaea; Euryarchaeota; Thermoplasmata; Thermoplasmatales; Terrestrial_Miscellaneous_Gp(TMEG); Terrestrial_Miscellaneous_Gp(TMEG)_ge
Archaea; Euryarchaeota; Thermoplasmata; Thermoplasmatales; Terrestrial_Miscellaneous_Gp(TMEG); Terrestrial_Miscellaneous_Gp(TMEG)_ge
Archaea; Euryarchaeota; Thermoplasmata; Thermoplasmatales; Terrestrial_Miscellaneous_Gp(TMEG); Terrestrial_Miscellaneous_Gp(TMEG)_ge
Archaea; Euryarchaeota; Thermoplasmata; Thermoplasmatales; Terrestrial_Miscellaneous_Gp(TMEG); Terrestrial_Miscellaneous_Gp(TMEG)_ge
Archaea; Euryarchaeota; Thermoplasmata; Thermoplasmatales; Terrestrial_Miscellaneous_Gp(TMEG); Terrestrial_Miscellaneous_Gp(TMEG)_ge
Archaea; Euryarchaeota; Thermoplasmata; Thermoplasmatales; Terrestrial_Miscellaneous_Gp(TMEG); Terrestrial_Miscellaneous_Gp(TMEG)_ge
Archaea; Euryarchaeota; Thermoplasmata; Thermoplasmatales; Terrestrial_Miscellaneous_Gp(TMEG); Terrestrial_Miscellaneous_Gp(TMEG)_ge
Archaea; Euryarchaeota; Thermoplasmata; Thermoplasmatales; Terrestrial_Miscellaneous_Gp(TMEG); Terrestrial_Miscellaneous_Gp(TMEG)_ge
Archaea; Euryarchaeota; Thermoplasmata; Thermoplasmatales; Terrestrial_Miscellaneous_Gp(TMEG); Terrestrial_Miscellaneous_Gp(TMEG)_ge
Archaea; Euryarchaeota; Thermoplasmata; Thermoplasmatales; Terrestrial_Miscellaneous_Gp(TMEG); Terrestrial_Miscellaneous_Gp(TMEG)_ge
Archaea; Euryarchaeota; Thermoplasmata; Thermoplasmatales; Terrestrial_Miscellaneous_Gp(TMEG); Terrestrial_Miscellaneous_Gp(TMEG)_ge
Archaea; Euryarchaeota; Thermoplasmata; Thermoplasmatales; Terrestrial_Miscellaneous_Gp(TMEG); Terrestrial_Miscellaneous_Gp(TMEG)_ge
Archaea; Euryarchaeota; Thermoplasmata; Thermoplasmatales; Terrestrial_Miscellaneous_Gp(TMEG); Terrestrial_Miscellaneous_Gp(TMEG)_ge
Archaea; Euryarchaeota; Thermoplasmata; Thermoplasmatales; Terrestrial_Miscellaneous_Gp(TMEG); Terrestrial_Miscellaneous_Gp(TMEG)_ge
Archaea; Euryarchaeota; Thermoplasmata; Thermoplasmatales; Terrestrial_Miscellaneous_Gp(TMEG); Terrestrial_Miscellaneous_Gp(TMEG)_ge
Archaea; Euryarchaeota; Thermoplasmata; Thermoplasmatales; Terrestrial_Miscellaneous_Gp(TMEG); Terrestrial_Miscellaneous_Gp(TMEG)_ge
Archaea; Euryarchaeota; Thermoplasmata; Thermoplasmatales; Terrestrial_Miscellaneous_Gp(TMEG); Terrestrial_Miscellaneous_Gp(TMEG)_ge
Archaea; Euryarchaeota; Thermoplasmata; Thermoplasmatales; Terrestrial_Miscellaneous_Gp(TMEG); Terrestrial_Miscellaneous_Gp(TMEG)_ge
Archaea; Euryarchaeota; Thermoplasmata; Thermoplasmatales; Terrestrial_Miscellaneous_Gp(TMEG); Terrestrial_Miscellaneous_Gp(TMEG)_ge
Archaea; Euryarchaeota; Thermoplasmata; Thermoplasmatales; Terrestrial_Miscellaneous_Gp(TMEG); Terrestrial_Miscellaneous_Gp(TMEG)_ge
Archaea; Euryarchaeota; Thermoplasmata; Thermoplasmatales; Terrestrial_Miscellaneous_Gp(TMEG); Terrestrial_Miscellaneous_Gp(TMEG)_ge
Archaea; Euryarchaeota; Thermoplasmata; Thermoplasmatales; Terrestrial_Miscellaneous_Gp(TMEG); Terrestrial_Miscellaneous_Gp(TMEG)_ge
Archaea; Euryarchaeota; Thermoplasmata; Thermoplasmatales; Terrestrial_Miscellaneous_Gp(TMEG); Terrestrial_Miscellaneous_Gp(TMEG)_ge
Archaea; Euryarchaeota; Thermoplasmata; Thermoplasmatales; Terrestrial_Miscellaneous_Gp(TMEG); Terrestrial_Miscellaneous_Gp(TMEG)_ge
Archaea; Euryarchaeota; Thermoplasmata; Thermoplasmatales; Terrestrial_Miscellaneous_Gp(TMEG); Terrestrial_Miscellaneous_Gp(TMEG)_ge
Archaea; Euryarchaeota; Thermoplasmata; Thermoplasmatales; Terrestrial_Miscellaneous_Gp(TMEG); Terrestrial_Miscellaneous_Gp(TMEG)_ge
Archaea; Euryarchaeota; Thermoplasmata; Thermoplasmatales; Terrestrial_Miscellaneous_Gp(TMEG); Terrestrial_Miscellaneous_Gp(TMEG)_ge
Archaea; Euryarchaeota; Thermoplasmata; Thermoplasmatales; Terrestrial_Miscellaneous_Gp(TMEG); Terrestrial_Miscellaneous_Gp(TMEG)_ge
Archaea; Euryarchaeota; Thermoplasmata; Thermoplasmatales; Terrestrial_Miscellaneous_Gp(TMEG); Terrestrial_Miscellaneous_Gp(TMEG)_ge
Archaea; Euryarchaeota; Thermoplasmata; Thermoplasmatales; Terrestrial_Miscellaneous_Gp(TMEG); Terrestrial_Miscellaneous_Gp(TMEG)_ge
Archaea; Euryarchaeota; Thermoplasmata; Thermoplasmatales; Terrestrial_Miscellaneous_Gp(TMEG); Terrestrial_Miscellaneous_Gp(TMEG)_ge
Archaea; Euryarchaeota; Thermoplasmata; Thermoplasmatales; Terrestrial_Miscellaneous_Gp(TMEG); Terrestrial_Miscellaneous_Gp(TMEG)_ge
Archaea; Euryarchaeota; Thermoplasmata; Thermoplasmatales; Terrestrial_Miscellaneous_Gp(TMEG); Terrestrial_Miscellaneous_Gp(TMEG)_ge
Archaea; Euryarchaeota; Thermoplasmata; Thermoplasmatales; Terrestrial_Miscellaneous_Gp(TMEG); Terrestrial_Miscellaneous_Gp(TMEG)_ge
Archaea; Euryarchaeota; Thermoplasmata; Thermoplasmatales; Thermoplasmatales_unclassified; Thermoplasmatales_unclassified
Archaea; Euryarchaeota; Thermoplasmata; Thermoplasmatales; Thermoplasmatales_unclassified; Thermoplasmatales_unclassified
Archaea; Euryarchaeota; Thermoplasmata; Thermoplasmatales; Thermoplasmatales_unclassified; Thermoplasmatales_unclassified
Archaea; Euryarchaeota; Thermoplasmata; Thermoplasmatales; Thermoplasmatales_unclassified; Thermoplasmatales_unclassified
Archaea; Euryarchaeota; Thermoplasmata; Thermoplasmatales; Thermoplasmatales_unclassified; Thermoplasmatales_unclassified
Archaea; Euryarchaeota; Thermoplasmata; Thermoplasmatales; Thermoplasmatales_unclassified; Thermoplasmatales_unclassified
Archaea; Euryarchaeota; Thermoplasmata; Thermoplasmatales; Thermoplasmatales_unclassified; Thermoplasmatales_unclassified
Archaea; Euryarchaeota; Thermoplasmata; Thermoplasmatales; Thermoplasmatales_unclassified; Thermoplasmatales_unclassified
Archaea; Euryarchaeota; Thermoplasmata; Thermoplasmatales; Thermoplasmatales_unclassified; Thermoplasmatales_unclassified
Archaea; Euryarchaeota; Thermoplasmata; Thermoplasmatales; Thermoplasmatales_unclassified; Thermoplasmatales_unclassified
Archaea; Euryarchaeota; Thermoplasmata; Thermoplasmatales; Thermoplasmatales_unclassified; Thermoplasmatales_unclassified
Archaea; Euryarchaeota; Thermoplasmata; Thermoplasmatales; Thermoplasmatales_unclassified; Thermoplasmatales_unclassified
Archaea; Euryarchaeota; Thermoplasmata; Thermoplasmatales; Thermoplasmatales_unclassified; Thermoplasmatales_unclassified
Archaea; Euryarchaeota; Thermoplasmata; Thermoplasmatales; Thermoplasmatales_unclassified; Thermoplasmatales_unclassified
Archaea; Euryarchaeota; Thermoplasmata; Thermoplasmatales; Thermoplasmatales_unclassified; Thermoplasmatales_unclassified
Archaea; Euryarchaeota; Thermoplasmata; Thermoplasmatales; Thermoplasmatales_unclassified; Thermoplasmatales_unclassified
Archaea; Euryarchaeota; Thermoplasmata; Thermoplasmatales; Thermoplasmatales_unclassified; Thermoplasmatales_unclassified
Archaea; Euryarchaeota; Thermoplasmata; Thermoplasmatales; Thermoplasmatales_unclassified; Thermoplasmatales_unclassified
Archaea; Euryarchaeota; Thermoplasmata; Thermoplasmatales; Thermoplasmatales_unclassified; Thermoplasmatales_unclassified
Archaea; Euryarchaeota; Thermoplasmata; Thermoplasmatales; Thermoplasmatales_unclassified; Thermoplasmatales_unclassified
Archaea; Euryarchaeota; Thermoplasmata; Thermoplasmatales; Thermoplasmatales_unclassified; Thermoplasmatales_unclassified
Archaea; Euryarchaeota; Thermoplasmata; Thermoplasmatales; Thermoplasmatales_unclassified; Thermoplasmatales_unclassified
Archaea; Euryarchaeota; Thermoplasmata; Thermoplasmatales; Thermoplasmatales_unclassified; Thermoplasmatales_unclassified
Archaea; Euryarchaeota; Thermoplasmata; Thermoplasmatales; Thermoplasmatales_unclassified; Thermoplasmatales_unclassified
Archaea; Euryarchaeota; Thermoplasmata; Thermoplasmatales; Thermoplasmatales_unclassified; Thermoplasmatales_unclassified
Archaea; Euryarchaeota; Thermoplasmata; Thermoplasmatales; Thermoplasmatales_unclassified; Thermoplasmatales_unclassified
Archaea; Euryarchaeota; Thermoplasmata; Thermoplasmatales; Thermoplasmatales_unclassified; Thermoplasmatales_unclassified
Archaea; Euryarchaeota; Thermoplasmata; Thermoplasmatales; Thermoplasmatales_unclassified; Thermoplasmatales_unclassified
Archaea; Euryarchaeota; Thermoplasmata; Thermoplasmatales; Thermoplasmatales_unclassified; Thermoplasmatales_unclassified
Archaea; Euryarchaeota; Thermoplasmata; Thermoplasmatales; Thermoplasmatales_unclassified; Thermoplasmatales_unclassified
Archaea; Euryarchaeota; Thermoplasmata; Thermoplasmatales; Thermoplasmatales_unclassified; Thermoplasmatales_unclassified
Archaea; Euryarchaeota; Thermoplasmata; Thermoplasmatales; Thermoplasmatales_unclassified; Thermoplasmatales_unclassified
Archaea; Euryarchaeota; Thermoplasmata; Thermoplasmatales; Thermoplasmatales_unclassified; Thermoplasmatales_unclassified
Archaea; Euryarchaeota; Thermoplasmata; Thermoplasmatales; Thermoplasmatales_unclassified; Thermoplasmatales_unclassified
Archaea; Euryarchaeota; Thermoplasmata; Thermoplasmatales; Thermoplasmatales_unclassified; Thermoplasmatales_unclassified
Archaea; Euryarchaeota; Thermoplasmata; Thermoplasmatales; Thermoplasmatales_unclassified; Thermoplasmatales_unclassified
Archaea; Euryarchaeota; Thermoplasmata; Thermoplasmatales; Thermoplasmatales_unclassified; Thermoplasmatales_unclassified
Archaea; Euryarchaeota; Thermoplasmata; Thermoplasmatales; Thermoplasmatales_unclassified; Thermoplasmatales_unclassified
Archaea; Euryarchaeota; Thermoplasmata; Thermoplasmatales; Thermoplasmatales_unclassified; Thermoplasmatales_unclassified
Archaea; Euryarchaeota; Thermoplasmata; Thermoplasmatales; Thermoplasmatales_unclassified; Thermoplasmatales_unclassified
Archaea; Euryarchaeota; Thermoplasmata; Thermoplasmatales; Thermoplasmatales_unclassified; Thermoplasmatales_unclassified
Archaea; Euryarchaeota; Thermoplasmata; Thermoplasmatales; Thermoplasmatales_unclassified; Thermoplasmatales_unclassified
Archaea; Euryarchaeota; Thermoplasmata; Thermoplasmatales; Thermoplasmatales_unclassified; Thermoplasmatales_unclassified
Archaea; Euryarchaeota; Thermoplasmata; Thermoplasmatales; Thermoplasmatales_unclassified; Thermoplasmatales_unclassified
Archaea; Euryarchaeota; Thermoplasmata; Thermoplasmatales; Thermoplasmatales_unclassified; Thermoplasmatales_unclassified
Archaea; Euryarchaeota; Thermoplasmata; Thermoplasmatales; Thermoplasmatales_unclassified; Thermoplasmatales_unclassified
Archaea; Euryarchaeota; Thermoplasmata; Thermoplasmatales; Thermoplasmatales_unclassified; Thermoplasmatales_unclassified
Archaea; Euryarchaeota; Thermoplasmata; Thermoplasmatales; Thermoplasmatales_unclassified; Thermoplasmatales_unclassified
Archaea; Euryarchaeota; Thermoplasmata; Thermoplasmatales; Thermoplasmatales_unclassified; Thermoplasmatales_unclassified
Archaea; Euryarchaeota; Thermoplasmata; Thermoplasmatales; Thermoplasmatales_unclassified; Thermoplasmatales_unclassified
Archaea; Euryarchaeota; Thermoplasmata; Thermoplasmatales; Thermoplasmatales_unclassified; Thermoplasmatales_unclassified
Archaea; Euryarchaeota; Thermoplasmata; Thermoplasmatales; Thermoplasmatales_unclassified; Thermoplasmatales_unclassified
Archaea; Euryarchaeota; Thermoplasmata; Thermoplasmatales; Thermoplasmatales_unclassified; Thermoplasmatales_unclassified
Archaea; Euryarchaeota; Thermoplasmata; Thermoplasmatales; Thermoplasmatales_unclassified; Thermoplasmatales_unclassified
Archaea; Euryarchaeota; Thermoplasmata; Thermoplasmatales; Thermoplasmatales_unclassified; Thermoplasmatales_unclassified
Archaea; Euryarchaeota; Thermoplasmata; Thermoplasmatales; Thermoplasmatales_unclassified; Thermoplasmatales_unclassified
Archaea; Euryarchaeota; Thermoplasmata; Thermoplasmatales; Thermoplasmatales_unclassified; Thermoplasmatales_unclassified
Archaea; Euryarchaeota; Thermoplasmata; Thermoplasmatales; Thermoplasmatales_unclassified; Thermoplasmatales_unclassified
Archaea; Euryarchaeota; Thermoplasmata; Thermoplasmatales; Thermoplasmatales_unclassified; Thermoplasmatales_unclassified
Archaea; Euryarchaeota; Thermoplasmata; Thermoplasmatales; Thermoplasmatales_unclassified; Thermoplasmatales_unclassified
Archaea; Euryarchaeota; Thermoplasmata; Thermoplasmatales; Thermoplasmatales_unclassified; Thermoplasmatales_unclassified
Archaea; Euryarchaeota; Thermoplasmata; Thermoplasmatales; Thermoplasmatales_unclassified; Thermoplasmatales_unclassified
Archaea; Euryarchaeota; Thermoplasmata; Thermoplasmatales; Thermoplasmatales_unclassified; Thermoplasmatales_unclassified
Archaea; Euryarchaeota; Thermoplasmata; Thermoplasmatales; Thermoplasmatales_unclassified; Thermoplasmatales_unclassified
Archaea; Euryarchaeota; Thermoplasmata; Thermoplasmatales; Thermoplasmatales_unclassified; Thermoplasmatales_unclassified
Archaea; Euryarchaeota; Thermoplasmata; Thermoplasmatales; Thermoplasmatales_unclassified; Thermoplasmatales_unclassified
Archaea; Euryarchaeota; Thermoplasmata; Thermoplasmatales; Thermoplasmatales_unclassified; Thermoplasmatales_unclassified
Archaea; Euryarchaeota; Thermoplasmata; Thermoplasmatales; Thermoplasmatales_unclassified; Thermoplasmatales_unclassified
Archaea; Euryarchaeota; Thermoplasmata; Thermoplasmatales; Thermoplasmatales_unclassified; Thermoplasmatales_unclassified
Archaea; Euryarchaeota; Thermoplasmata; Thermoplasmatales; Thermoplasmatales_unclassified; Thermoplasmatales_unclassified
Archaea; Euryarchaeota; Thermoplasmata; Thermoplasmatales; Thermoplasmatales_unclassified; Thermoplasmatales_unclassified
Archaea; Euryarchaeota; Thermoplasmata; Thermoplasmatales; Thermoplasmatales_unclassified; Thermoplasmatales_unclassified
Archaea; Euryarchaeota; Thermoplasmata; Thermoplasmatales; Thermoplasmatales_unclassified; Thermoplasmatales_unclassified
Archaea; Euryarchaeota; Thermoplasmata; Thermoplasmatales; Thermoplasmatales_unclassified; Thermoplasmatales_unclassified
Archaea; Euryarchaeota; Thermoplasmata; Thermoplasmatales; Thermoplasmatales_unclassified; Thermoplasmatales_unclassified
Archaea; Euryarchaeota; Thermoplasmata; Thermoplasmatales; Thermoplasmatales_unclassified; Thermoplasmatales_unclassified
Archaea; Euryarchaeota; Thermoplasmata; Thermoplasmatales; Thermoplasmatales_unclassified; Thermoplasmatales_unclassified
Archaea; Euryarchaeota; Thermoplasmata; Thermoplasmatales; Thermoplasmatales_unclassified; Thermoplasmatales_unclassified
Archaea; Euryarchaeota; Thermoplasmata; Thermoplasmatales; Thermoplasmatales_unclassified; Thermoplasmatales_unclassified
Archaea; Euryarchaeota; Thermoplasmata; Thermoplasmatales; Thermoplasmatales_unclassified; Thermoplasmatales_unclassified
Archaea; Euryarchaeota; Thermoplasmata; Thermoplasmatales; Thermoplasmatales_unclassified; Thermoplasmatales_unclassified
Archaea; Euryarchaeota; Thermoplasmata; Thermoplasmatales; Thermoplasmatales_unclassified; Thermoplasmatales_unclassified
Archaea; Euryarchaeota; Thermoplasmata; Thermoplasmatales; Thermoplasmatales_unclassified; Thermoplasmatales_unclassified
Archaea; Euryarchaeota; Thermoplasmata; Thermoplasmatales; Thermoplasmatales_unclassified; Thermoplasmatales_unclassified
Archaea; Euryarchaeota; Thermoplasmata; Thermoplasmatales; Thermoplasmatales_unclassified; Thermoplasmatales_unclassified
Archaea; Euryarchaeota; Thermoplasmata; Thermoplasmatales; Thermoplasmatales_unclassified; Thermoplasmatales_unclassified
Archaea; Euryarchaeota; Thermoplasmata; Thermoplasmatales; Thermoplasmatales_unclassified; Thermoplasmatales_unclassified
Archaea; Euryarchaeota; Thermoplasmata; Thermoplasmatales; Thermoplasmatales_unclassified; Thermoplasmatales_unclassified
Archaea; Euryarchaeota; Thermoplasmata; Thermoplasmatales; Thermoplasmatales_unclassified; Thermoplasmatales_unclassified
Archaea; Euryarchaeota; Thermoplasmata; Thermoplasmatales; Thermoplasmatales_unclassified; Thermoplasmatales_unclassified
Archaea; Euryarchaeota; Thermoplasmata; Thermoplasmatales; Thermoplasmatales_unclassified; Thermoplasmatales_unclassified
Archaea; Euryarchaeota; Thermoplasmata; Thermoplasmatales; Thermoplasmatales_unclassified; Thermoplasmatales_unclassified
Archaea; Euryarchaeota; Thermoplasmata; Thermoplasmatales; Thermoplasmatales_unclassified; Thermoplasmatales_unclassified
Archaea; Euryarchaeota; Thermoplasmata; Thermoplasmatales; Thermoplasmatales_unclassified; Thermoplasmatales_unclassified
Archaea; Euryarchaeota; Thermoplasmata; Thermoplasmatales; Thermoplasmatales_unclassified; Thermoplasmatales_unclassified
Archaea; Euryarchaeota; Thermoplasmata; Thermoplasmatales; Thermoplasmatales_unclassified; Thermoplasmatales_unclassified
Archaea; Euryarchaeota; Thermoplasmata; Thermoplasmatales; Thermoplasmatales_unclassified; Thermoplasmatales_unclassified
Archaea; Euryarchaeota; Thermoplasmata; Thermoplasmatales; Thermoplasmatales_unclassified; Thermoplasmatales_unclassified
Archaea; Euryarchaeota; Thermoplasmata; Thermoplasmatales; Thermoplasmatales_unclassified; Thermoplasmatales_unclassified
Archaea; Euryarchaeota; Thermoplasmata; Thermoplasmatales; Thermoplasmatales_unclassified; Thermoplasmatales_unclassified
Archaea; Euryarchaeota; Thermoplasmata; Thermoplasmatales; Thermoplasmatales_unclassified; Thermoplasmatales_unclassified
Archaea; Euryarchaeota; Thermoplasmata; Thermoplasmatales; Thermoplasmatales_unclassified; Thermoplasmatales_unclassified
Archaea; Euryarchaeota; Thermoplasmata; Thermoplasmatales; Thermoplasmatales_unclassified; Thermoplasmatales_unclassified
Archaea; Euryarchaeota; Thermoplasmata; Thermoplasmatales; Thermoplasmatales_unclassified; Thermoplasmatales_unclassified
Archaea; Euryarchaeota; Thermoplasmata; Thermoplasmatales; Thermoplasmatales_unclassified; Thermoplasmatales_unclassified
Archaea; Euryarchaeota; Thermoplasmata; Thermoplasmatales; Thermoplasmatales_unclassified; Thermoplasmatales_unclassified
Archaea; Euryarchaeota; Thermoplasmata; Thermoplasmatales; Thermoplasmatales_unclassified; Thermoplasmatales_unclassified
Archaea; Euryarchaeota; Thermoplasmata; Thermoplasmatales; Thermoplasmatales_unclassified; Thermoplasmatales_unclassified
Archaea; Euryarchaeota; Thermoplasmata; Thermoplasmatales; Thermoplasmatales_unclassified; Thermoplasmatales_unclassified
Archaea; Euryarchaeota; Thermoplasmata; Thermoplasmatales; Thermoplasmatales_unclassified; Thermoplasmatales_unclassified
Archaea; Euryarchaeota; Thermoplasmata; Thermoplasmatales; Thermoplasmatales_unclassified; Thermoplasmatales_unclassified
Archaea; Euryarchaeota; Thermoplasmata; Thermoplasmatales; Thermoplasmatales_unclassified; Thermoplasmatales_unclassified
Archaea; Euryarchaeota; Thermoplasmata; Thermoplasmatales; Thermoplasmatales_unclassified; Thermoplasmatales_unclassified
Archaea; Euryarchaeota; Thermoplasmata; Thermoplasmatales; Thermoplasmatales_unclassified; Thermoplasmatales_unclassified
Archaea; Euryarchaeota; Thermoplasmata; Thermoplasmatales; Thermoplasmatales_unclassified; Thermoplasmatales_unclassified
Archaea; Euryarchaeota; Thermoplasmata; Thermoplasmatales; Thermoplasmatales_unclassified; Thermoplasmatales_unclassified
Archaea; Euryarchaeota; Thermoplasmata; Thermoplasmatales; Thermoplasmatales_unclassified; Thermoplasmatales_unclassified
Archaea; Euryarchaeota; Thermoplasmata; Thermoplasmatales; Thermoplasmatales_unclassified; Thermoplasmatales_unclassified
Archaea; Euryarchaeota; Thermoplasmata; Thermoplasmatales; Thermoplasmatales_unclassified; Thermoplasmatales_unclassified
Archaea; Euryarchaeota; Thermoplasmata; Thermoplasmatales; Thermoplasmatales_unclassified; Thermoplasmatales_unclassified
Archaea; Euryarchaeota; Thermoplasmata; Thermoplasmatales; Thermoplasmatales_unclassified; Thermoplasmatales_unclassified
Archaea; Euryarchaeota; Thermoplasmata; Thermoplasmatales; Thermoplasmatales_unclassified; Thermoplasmatales_unclassified
Archaea; Euryarchaeota; Thermoplasmata; Thermoplasmatales; Thermoplasmatales_unclassified; Thermoplasmatales_unclassified
Archaea; Euryarchaeota; Thermoplasmata; Thermoplasmatales; Thermoplasmatales_unclassified; Thermoplasmatales_unclassified
Archaea; Euryarchaeota; Thermoplasmata; Thermoplasmatales; Thermoplasmatales_unclassified; Thermoplasmatales_unclassified
Archaea; Euryarchaeota; Thermoplasmata; Thermoplasmatales; Thermoplasmatales_unclassified; Thermoplasmatales_unclassified
Archaea; Euryarchaeota; Thermoplasmata; Thermoplasmatales; Thermoplasmatales_unclassified; Thermoplasmatales_unclassified
Archaea; Euryarchaeota; Thermoplasmata; Thermoplasmatales; Thermoplasmatales_unclassified; Thermoplasmatales_unclassified
Archaea; Euryarchaeota; Thermoplasmata; Thermoplasmatales; Thermoplasmatales_unclassified; Thermoplasmatales_unclassified
Archaea; Euryarchaeota; Thermoplasmata; Thermoplasmatales; Thermoplasmatales_unclassified; Thermoplasmatales_unclassified
Archaea; Euryarchaeota; Thermoplasmata; Thermoplasmatales; Thermoplasmatales_unclassified; Thermoplasmatales_unclassified
Archaea; Euryarchaeota; Thermoplasmata; Thermoplasmatales; Thermoplasmatales_unclassified; Thermoplasmatales_unclassified
Archaea; Euryarchaeota; Thermoplasmata; Thermoplasmatales; Thermoplasmatales_unclassified; Thermoplasmatales_unclassified
Archaea; Euryarchaeota; Thermoplasmata; Thermoplasmatales; Thermoplasmatales_unclassified; Thermoplasmatales_unclassified
Archaea; Euryarchaeota; Thermoplasmata; Thermoplasmatales; Thermoplasmatales_unclassified; Thermoplasmatales_unclassified
Archaea; Euryarchaeota; Thermoplasmata; Thermoplasmatales; Thermoplasmatales_unclassified; Thermoplasmatales_unclassified
Archaea; Euryarchaeota; Thermoplasmata; Thermoplasmatales; Thermoplasmatales_unclassified; Thermoplasmatales_unclassified
Archaea; Euryarchaeota; Thermoplasmata; Thermoplasmatales; Thermoplasmatales_unclassified; Thermoplasmatales_unclassified
Archaea; Euryarchaeota; Thermoplasmata; Thermoplasmatales; Thermoplasmatales_unclassified; Thermoplasmatales_unclassified
Archaea; Euryarchaeota; Thermoplasmata; Thermoplasmatales; Thermoplasmatales_unclassified; Thermoplasmatales_unclassified
Archaea; Euryarchaeota; Thermoplasmata; Thermoplasmatales; Thermoplasmatales_unclassified; Thermoplasmatales_unclassified
Archaea; Euryarchaeota; Thermoplasmata; Thermoplasmatales; Thermoplasmatales_unclassified; Thermoplasmatales_unclassified
Archaea; Euryarchaeota; Thermoplasmata; Thermoplasmatales; Thermoplasmatales_unclassified; Thermoplasmatales_unclassified
Archaea; Euryarchaeota; Thermoplasmata; Thermoplasmatales; Thermoplasmatales_unclassified; Thermoplasmatales_unclassified
Archaea; Euryarchaeota; Thermoplasmata; Thermoplasmatales; Thermoplasmatales_unclassified; Thermoplasmatales_unclassified
Archaea; Euryarchaeota; Thermoplasmata; Thermoplasmatales; Thermoplasmatales_unclassified; Thermoplasmatales_unclassified
Archaea; Euryarchaeota; Thermoplasmata; Thermoplasmatales; Thermoplasmatales_unclassified; Thermoplasmatales_unclassified
